# Supplementary material for: A genome-wide screen in macrophages identifies new regulators of IFNγ-inducible MHCII that contribute to T cell activation
Source: bioRxiv preprint, doi:10.1101/2020.08.12.248252, version 1 (2020-08-12)
Supplement: Supplemental Table 1 [file 248252_file02.xlsx]

## Sheet: Gene Sumary
Gene ID	neg|rank	num	neg|score	neg|p-value	neg|goodsgrna	neg|lfc
Ifngr2	1	4	1.5345e-10	2.5165e-07	4	-5.678
Ifngr1	2	4	4.3635e-09	2.5165e-07	4	-4.0967
Stat1	3	4	3.4996e-08	7.5496e-07	4	-3.2297
Jak1	4	4	1.8015e-07	1.2583e-06	4	-3.3075
Fcgr1	5	4	1.1311e-06	1.7616e-06	4	-3.7185
Med16	6	4	2.1709e-06	3.7748e-06	4	-3.2013
Fzd4	7	4	3.7936e-06	4.2781e-06	2	-6.4316
H2-Ab1	8	4	7.9502e-06	1.4344e-05	3	-6.544
Tfap4	9	4	1.1557e-05	2.1894e-05	4	-2.6617
Rfxank	10	4	1.6401e-05	2.7933e-05	3	-3.2714
Mtx2	11	4	1.9055e-05	2.9947e-05	3	-4.8497
Ppm1b	12	4	3.0195e-05	4.2026e-05	3	-4.2221
Ciita	13	4	3.7034e-05	5.5112e-05	3	-3.4719
Tcof1	14	4	5.5691e-05	7.9774e-05	3	-3.8076
Vim	15	4	6.8726e-05	9.7389e-05	3	-3.1366
Rfx5	16	4	8.7465e-05	0.00012457	3	-2.4999
Repin1	17	4	9.2041e-05	0.0001291	2	-6.0869
Ssfa2	18	4	0.00016825	0.00037521	3	-2.993
Heatr1	19	4	0.00020367	0.0005564	2	-5.7512
Rc3h1	20	4	0.00020449	0.0005564	3	-4.2544
Wwc2	21	4	0.00029505	0.00069733	2	-4.1173
Gsk3b	22	4	0.00032188	0.00073407	3	-3.3103
Gstcd	23	4	0.00033092	0.00075118	1	-7.4224
Rfxap	24	4	0.00035406	0.00078541	3	-2.7072
Ap3m1	25	4	0.00036152	0.00080302	3	-4.3237
Zfp128	26	4	0.00038182	0.00082466	1	-7.3809
Tax1bp1	27	4	0.00041174	0.00084756	3	-3.1326
Lamtor4	28	4	0.00049168	0.0011956	2	-5.4819
Pak1	29	4	0.00053452	0.0012409	1	-7.2986
Arl8a	30	4	0.00053479	0.0012414	3	-3.098
Psmg2	31	4	0.00053492	0.0012414	2	-4.2682
Gm14496	32	4	0.00058541	0.0013214	1	-7.2633
Dr1	33	4	0.00060762	0.0013582	3	-3.9616
Trub1	34	4	0.00062834	0.0013994	2	-5.5161
Lamtor2	35	4	0.0006363	0.001409	1	-6.7565
H2-Aa	36	4	0.00064669	0.0014241	3	-3.6032
Cml2	37	4	0.00065821	0.0014427	3	-2.349
Pcsk4	38	4	0.00066747	0.0014583	2	-4.3245
Nudcd1	39	4	0.0006872	0.0014845	2	-5.0239
Gnb1l	40	4	0.00070052	0.0015036	3	-4.3126
Alg13	41	4	0.0007047	0.0015092	3	-3.7101
Bcl11a	42	4	0.00073808	0.001557	1	-7.1891
Nop9	43	4	0.00076333	0.0016113	3	-3.1181
Taf5l	44	4	0.00078897	0.0016521	1	-7.1473
Rfwd2	45	4	0.00079494	0.0016622	3	-2.5011
Hexim1	46	4	0.00080355	0.0016682	3	-2.7098
Rpp40	47	4	0.00083986	0.0017221	1	-7.1162
Smarca5	48	4	0.00086018	0.0017492	3	-4.0118
Sdhaf1	49	4	0.00088599	0.0018061	2	-3.2605
Epc2	50	4	0.00094162	0.0019777	1	-6.6024
Apof	51	4	0.00099887	0.002168	2	-3.3828
Rnf215	52	4	0.0010164	0.0021685	2	-3.1554
1110032A03Rik	53	4	0.0010434	0.0021836	1	-7.0032
Sirt1	54	4	0.0011184	0.0023497	2	-2.9153
Htr4	55	4	0.0011514	0.0024997	2	-4.8243
Senp5	56	4	0.0012469	0.0026975	2	-5.619
Sacm1l	57	4	0.001264	0.0027105	2	-5.463
Kdm5b	58	4	0.0013486	0.0028756	1	-6.3639
Ift88	59	4	0.0013592	0.0028797	2	-4.9288
Ccdc108	60	4	0.0013995	0.0028968	2	-5.0997
Spop	61	4	0.0014184	0.0029144	2	-5.5639
Prpf4	62	3	0.0015025	0.0023235	2	-5.2451
Bod1	63	4	0.0015285	0.0030115	2	-4.672
Pex10	64	4	0.0015428	0.0030181	2	-4.4624
Zc3h14	65	4	0.0016029	0.0031736	1	-6.1764
Sp110	66	4	0.001618	0.0031806	2	-4.5758
Fgfrl1	67	4	0.0016538	0.0031952	1	-6.8449
Rb1cc1	68	3	0.0017328	0.0026597	2	-4.0893
Tfpi	69	4	0.0017555	0.0032788	1	-6.8137
Maats1	70	4	0.0018063	0.003311	1	-4.9445
Akr1c13	71	4	0.0018572	0.0033422	1	-6.3092
Lars	72	4	0.0018961	0.0033719	2	-4.992
Slc25a20	73	4	0.0019588	0.0035677	1	-6.7833
Lsm12	74	4	0.0020097	0.0035883	1	-6.7819
Rhpn1	75	4	0.0020336	0.0036094	2	-5.4391
Srsf6	76	4	0.0020875	0.0037587	2	-5.2216
Angpt2	77	4	0.0021114	0.0037695	1	-5.8878
Stub1	78	4	0.0021476	0.0037843	2	-4.5723
Fnbp4	79	4	0.0021603	0.0037967	2	-4.4655
Nae1	80	4	0.0021622	0.0037972	1	-6.7734
Xpot	81	4	0.002173	0.003815	2	-4.9809
2610524H06Rik	82	3	0.0021942	0.0034489	1	-6.693
Rps28	83	3	0.0022323	0.0034912	1	-6.6924
Strap	84	4	0.0022415	0.0039864	2	-3.3882
Ccrn4l	85	4	0.0022639	0.003995	1	-6.7602
Gm4944	86	4	0.0023655	0.0042179	1	-4.8901
Dhrs1	87	4	0.0023875	0.0042366	2	-3.9698
Tmem169	88	4	0.0024172	0.0043725	2	-3.3773
Hspa13	89	4	0.0024352	0.0043883	2	-4.566
Nufip1	90	4	0.0025688	0.0046135	1	-6.7126
Zfp770	91	4	0.0025871	0.0046211	2	-3.1913
Epm2aip1	92	4	0.0026491	0.0046624	2	-4.5997
Rnf44	93	4	0.0026704	0.0046785	1	-5.9426
Eif3f	94	3	0.0026732	0.0040982	2	-4.5415
Zfp827	95	4	0.0026804	0.004684	2	-4.0716
Rbpj	96	4	0.0027166	0.0046976	2	-5.3109
Xk	97	4	0.0027721	0.004839	1	-6.0536
Mcm7	98	4	0.0027944	0.0048435	2	-4.6771
Spc24	99	3	0.0028111	0.0043093	2	-5.1256
Cks1b	100	4	0.0028229	0.0048501	1	-6.0451
Loh12cr1	101	4	0.0028233	0.0048501	2	-3.8917
Senp1	102	4	0.0028459	0.0048652	2	-3.737
Rwdd2b	103	4	0.0028737	0.0048702	1	-6.6937
Cyb5r4	104	4	0.0029075	0.0048959	2	-4.4125
Rgl1	105	4	0.002937	0.0049175	2	-4.07
Ctps	106	4	0.0029682	0.0049261	2	-4.828
Mrpl3	107	4	0.0030261	0.0049689	1	-6.6892
Ubxn7	108	4	0.0030628	0.0050086	2	-4.3952
Clns1a	109	4	0.0030769	0.0050116	1	-6.6841
Pex13	110	4	0.0031827	0.0052165	2	-4.491
Ankrd27	111	4	0.0032293	0.0052401	1	-6.6742
Ppp1r35	112	4	0.0032801	0.0052532	1	-6.6723
Kalrn	113	4	0.0033309	0.0052769	1	-6.6624
Mtg1	114	4	0.0033396	0.0052819	2	-4.6263
Gm3701	115	4	0.0033817	0.0053297	2	-4.7531
Tnfaip3	116	4	0.0034522	0.0054822	2	-3.1588
Rps9	117	4	0.0035163	0.0056453	2	-4.4751
Mrpl35	118	4	0.003534	0.0056629	2	-5.2304
Sin3a	119	4	0.0035396	0.0056705	2	-4.3566
Rsbn1	120	4	0.0035701	0.0056961	2	-5.0129
Atxn7l3	121	4	0.0035809	0.0056966	2	-4.2368
Xrcc1	122	4	0.0035848	0.0056966	1	-6.6406
Sec23ip	123	4	0.0037371	0.0059463	2	-4.3233
St3gal5	124	4	0.0037525	0.0059634	2	-2.8317
Akr1e1	125	4	0.0038387	0.0061642	2	-3.893
Rimbp3	126	4	0.0038894	0.006214	1	-5.529
Fam132a	127	4	0.0039402	0.0062674	1	-6.6031
Cirh1a	128	4	0.0039846	0.0062815	2	-4.5455
Brap	129	4	0.0040571	0.0065875	2	-4.8265
Dnajb9	130	4	0.0040802	0.0065991	2	-3.9656
Glcci1	131	4	0.0040925	0.0066046	1	-6.5846
Mrpl12	132	4	0.0041419	0.0066489	2	-5.0936
Psmc1	133	3	0.0041811	0.0064707	2	-4.0773
Fkrp	134	4	0.0042941	0.0070143	2	-3.3393
Ubr4	135	4	0.0042955	0.0070143	1	-6.573
U2af1l4	136	4	0.0043138	0.0070228	2	-3.2489
Hectd1	137	4	0.0043455	0.0070339	2	-4.1257
Gm10104	138	3	0.0043661	0.0067138	1	-6.4266
Gpr137c	139	4	0.004397	0.0072191	2	-4.1699
Mbnl1	140	4	0.0044478	0.0072614	1	-6.5573
Nudt19	141	4	0.0044972	0.0073107	2	-4.3885
Dars	142	4	0.0044985	0.0073208	1	-6.0626
Dhdds	143	4	0.0045659	0.0074718	2	-3.5439
Mrpl52	144	4	0.0046107	0.0074844	2	-4.4693
Socs5	145	4	0.0046507	0.0075156	1	-3.4017
Zfp438	146	4	0.0047015	0.0075543	1	-6.5336
Rreb1	147	4	0.0047419	0.0075614	2	-4.2997
Atp6ap1	148	4	0.004775	0.0077129	2	-4.0424
2020-09-01	149	4	0.0048029	0.007737	1	-4.9752
Pgbd5	150	4	0.0048537	0.0077738	1	-6.5302
Dpy30	151	4	0.0049085	0.0079444	2	-3.9932
Tmem208	152	4	0.0049551	0.0079821	2	-4.9484
Eif2b5	153	4	0.0050059	0.0079998	1	-6.5253
Cul4b	154	4	0.0050438	0.0080201	2	-3.6725
Fancd2	155	4	0.0050694	0.0081548	2	-4.3676
Art2b	156	4	0.0050736	0.0081553	2	-4.0738
Vnn3	157	4	0.0050822	0.0081553	2	-3.7829
Hipk3	158	4	0.0051073	0.0081734	1	-6.5173
Pecr	159	4	0.005158	0.0082081	1	-6.5161
Lcat	160	4	0.0052804	0.0083989	2	-3.15
Mtif3	161	4	0.0053022	0.0084208	2	-4.3392
Slc12a9	162	4	0.0053102	0.0084316	1	-6.5022
Fancc	163	4	0.0053633	0.0086218	2	-3.8092
Ahctf1	164	3	0.0053642	0.0080788	2	-3.5809
Cdk7	165	4	0.0054116	0.0086591	1	-6.4775
Dph5	166	4	0.0054557	0.0087044	2	-4.5796
Btd	167	4	0.0054623	0.0087044	1	-6.4661
E430025E21Rik	168	4	0.0055637	0.0087487	1	-6.4474
Orc2	169	4	0.0055845	0.0087623	2	-4.5515
Fcrl6	170	4	0.0056144	0.0087748	1	-6.444
Zc3h12c	171	4	0.0056383	0.0087889	2	-2.5406
Slc29a2	172	4	0.0056651	0.0087975	1	-5.0135
Mogs	173	4	0.0056787	0.008798	2	-4.7926
Inmt	174	4	0.0057918	0.0089953	2	-2.9147
Psmb3	175	3	0.005794	0.0089128	2	-4.4438
Cdc20	176	4	0.0058055	0.0089958	2	-4.5483
Kpna2	177	4	0.0058679	0.0090456	1	-5.9307
Dpp4	178	4	0.0059186	0.0090793	2	-4.1676
Anapc4	179	4	0.0059313	0.0090793	2	-3.9488
Dctpp1	180	4	0.0059693	0.0091136	1	-6.4172
Psmd3	181	4	0.0059704	0.0091138	2	-4.6315
Zswim7	182	3	0.0060058	0.0092897	2	-2.1414
Agfg1	183	4	0.00602	0.0091548	1	-5.9275
Prdm10	184	4	0.0060707	0.0091866	1	-6.4158
Kdm1a	185	4	0.0061213	0.0092268	1	-6.4133
S100a6	186	4	0.006172	0.0092882	1	-6.408
Xab2	187	4	0.0062227	0.0093597	1	-6.4064
Pdcd10	188	4	0.0062734	0.009404	1	-6.4059
Batf2	189	4	0.0063163	0.0094045	2	-3.8869
Tbc1d14	190	4	0.0063733	0.0095494	2	-3.4617
Scyl1	191	4	0.0063747	0.0095499	1	-6.4003
Inpp5a	192	4	0.0064162	0.0095892	2	-2.4712
1700123I01Rik	193	4	0.0064254	0.0095897	1	-6.3929
Tiprl	194	4	0.0064448	0.0096063	2	-4.3635
Zfand5	195	4	0.0064592	0.0096174	2	-4.2367
Irf2bpl	196	4	0.006512	0.0097563	2	-4.0742
Sclt1	197	4	0.0065264	0.0097568	2	-2.857
Mis18a	198	3	0.0065348	0.00994	1	-6.2443
S1pr1	199	4	0.0065505	0.0099106	2	-3.3579
Ttc3	200	4	0.0065774	0.0099289	1	-5.8868
Ikbkb	201	4	0.0066281	0.0099868	1	-6.3789
Cox8a	202	4	0.0066496	0.010007	2	-4.3193
Atp6v1c1	203	4	0.0066715	0.010029	2	-3.9267
Zkscan1	204	4	0.0066787	0.01003	1	-6.3779
Erg	205	4	0.0067397	0.010067	2	-4.4101
Ulk2	206	4	0.0067691	0.010074	2	-3.947
Gm4745	207	4	0.00678	0.01008	1	-6.3776
Ddx3x	208	4	0.0067887	0.01008	2	-4.0641
Cadm4	209	4	0.0068181	0.010118	2	-3.7733
Fryl	210	4	0.0068307	0.010118	1	-5.8686
Zfyve1	211	4	0.0068723	0.01017	2	-4.1629
Hist1h2ba	212	4	0.0068772	0.010171	2	-3.9548
Dpp9	213	4	0.0068969	0.01018	2	-2.0894
Ddx19a	214	3	0.006953	0.010844	1	-6.211
Znf512b	215	4	0.0069827	0.010399	1	-5.3604
Hist1h4c	216	4	0.0070333	0.010437	1	-6.3567
Cacna1a	217	4	0.0070359	0.010437	2	-4.1532
Cic	218	4	0.0070509	0.010437	2	-2.2884
Phlda2	219	4	0.007084	0.01047	1	-6.3526
Gm10767	220	4	0.007131	0.010471	2	-4.6714
Ube2n	221	4	0.0071787	0.010591	2	-4.2949
Fhod1	222	4	0.0071852	0.010591	1	-5.4402
Rnf146	223	4	0.0072064	0.010614	2	-2.3123
Akirin2	224	4	0.0072865	0.01076	1	-6.3405
Wdpcp	225	4	0.0073372	0.010792	1	-6.3391
Trub2	226	4	0.0073636	0.01083	2	-4.0948
Zbtb1	227	4	0.0074384	0.010992	1	-6.3333
Egln2	228	4	0.0075069	0.011182	2	-3.1311
Arl1	229	4	0.0075397	0.011191	1	-5.8438
Zfp146	230	4	0.0075843	0.011232	2	-3.2898
Ap1s3	231	4	0.0076205	0.011382	2	-3.5088
Tex2	232	4	0.0076409	0.011402	1	-6.3216
Fam69a	233	4	0.0077928	0.011609	1	-5.4992
Vma21	234	4	0.0078434	0.011652	1	-6.3018
Csnk1g1	235	4	0.0079237	0.011836	2	-3.1003
Cwc25	236	4	0.0079395	0.011837	2	-3.3255
Mtch1	237	4	0.0079447	0.011837	1	-6.2945
Palm	238	4	0.0079845	0.011873	2	-5.1128
Sf1	239	4	0.0080459	0.012033	1	-6.2895
Drg2	240	4	0.008072	0.012051	2	-4.0239
L3mbtl3	241	4	0.0080774	0.012052	2	-3.4519
Tmem29	242	4	0.0080965	0.012074	1	-6.2868
Aldh1a3	243	4	0.0081471	0.012112	1	-3.8292
Arid4a	244	4	0.0081977	0.012157	1	-6.279
Rpl36	245	3	0.0082112	0.013067	2	-3.7603
Arid1b	246	4	0.0082989	0.012256	1	-4.5444
Prim1	247	3	0.0083291	0.013294	2	-4.3962
Cecr5	248	4	0.0083495	0.01227	1	-6.2751
Tsc22d4	249	4	0.0084001	0.012307	1	-6.2742
Flcn	250	4	0.0084507	0.012349	1	-6.26
Tank	251	4	0.0084868	0.012384	2	-4.3832
Far2	252	4	0.0085519	0.012569	1	-4.3165
Acbd6	253	4	0.0085742	0.012598	2	-3.1131
Cep112	254	4	0.0086126	0.012743	2	-3.3991
Atm	255	4	0.0086896	0.012954	2	-3.7722
Tars	256	3	0.0088126	0.014169	2	-2.7668
Taf3	257	4	0.008814	0.013192	2	-4.1071
Mettl8	258	4	0.0089532	0.013511	2	-3.8174
Lrr1	259	4	0.0089532	0.013511	2	-3.6774
Chka	260	4	0.0090071	0.013543	1	-6.2238
Get4	261	4	0.0090794	0.013685	2	-4.0807
Acy1	262	4	0.0090906	0.013699	2	-3.4969
Fnip2	263	4	0.0091526	0.013853	2	-3.2235
Tsc1	264	4	0.0093057	0.014081	2	-4.5154
Rasa3	265	4	0.0093105	0.014082	1	-4.7367
Aco2	266	4	0.0093741	0.014239	2	-3.5947
Txnl1	267	4	0.0094342	0.014442	2	-3.6073
Slc39a7	268	3	0.0094596	0.015255	1	-6.0764
Cox20	269	4	0.0095002	0.014616	2	-4.0302
Ogdh	270	4	0.0095127	0.01463	1	-6.1976
Zbtb7a	271	4	0.0095203	0.01463	2	-4.327
Palm2	272	4	0.0095808	0.014666	2	-2.7944
AB124611	273	4	0.0096138	0.014689	1	-6.1969
Hist1h2ac	274	4	0.0096444	0.014725	2	-4.5056
Slc47a2	275	4	0.0096644	0.014747	1	-6.1886
Pelo	276	4	0.0096849	0.014748	2	-4.177
Hist1h2bf	277	3	0.0096872	0.01565	1	-6.0582
Iqgap1	278	4	0.0097655	0.01495	1	-6.1855
Pop5	279	3	0.009861	0.015994	2	-3.6174
Litaf	280	4	0.0098889	0.01531	2	-2.3046
Kri1	281	4	0.0099065	0.015311	2	-4.0483
Cep19	282	4	0.010069	0.015555	1	-5.6878
Leprotl1	283	4	0.010071	0.015555	2	-3.0992
Cyp2a12	284	4	0.010077	0.015555	2	-2.7327
Haus3	285	3	0.010105	0.016474	1	-5.5382
Pou2f1	286	4	0.01019	0.015891	2	-3.7096
Ept1	287	4	0.010271	0.016114	1	-6.1647
Ash2l	288	3	0.010294	0.016777	1	-6.0159
Klhl15	289	4	0.010321	0.016175	1	-6.1599
Ndc80	290	4	0.010327	0.016175	2	-4.1336
Ctdp1	291	4	0.01036	0.016197	2	-4.5504
Nars2	292	4	0.010473	0.01648	1	-6.1539
Mrps23	293	4	0.010495	0.016509	2	-4.1419
Tmem135	294	4	0.010523	0.01651	1	-5.5801
Slc25a11	295	4	0.010555	0.016539	2	-1.9996
Olfr1173	296	4	0.010574	0.016556	1	-6.1459
Oscar	297	4	0.0106	0.016573	2	-3.4723
Uba3	298	3	0.010623	0.017341	2	-2.4797
Trafd1	299	4	0.010624	0.016578	1	-5.1854
A530032D15Rik	300	4	0.010625	0.016578	2	-4.3193
Ipo7	301	2	0.010626	0.011431	1	-5.7505
Dgcr8	302	4	0.010675	0.016627	1	-6.1396
Jmjd4	303	4	0.010725	0.016677	1	-6.1395
Gkap1	304	4	0.010776	0.016702	1	-3.8133
Med13	305	4	0.010826	0.016747	1	-6.1359
Abca5	306	4	0.010865	0.016764	2	-3.6321
Copb2	307	4	0.010877	0.016764	1	-6.1353
Brms1	308	4	0.010927	0.016832	1	-6.133
Ubiad1	309	4	0.010978	0.01692	1	-6.1321
Scaf4	310	4	0.011028	0.016983	1	-5.0097
Atp5j	311	4	0.011056	0.016996	2	-2.6717
Mut	312	4	0.011062	0.016996	2	-2.5541
Zfp759	313	4	0.011155	0.017321	2	-2.5887
Lims2	314	4	0.011179	0.017335	2	-1.9015
Sri	315	4	0.01118	0.017335	1	-6.1188
Mterf2	316	4	0.011198	0.017351	2	-3.2363
Ascc3	317	4	0.011245	0.017407	2	-4.1856
Cfap126	318	4	0.011281	0.017455	1	-6.1132
Plin3	319	4	0.011285	0.017455	2	-2.8608
Tuba1b	320	4	0.011429	0.017555	2	-3.9217
Tnfrsf25	321	4	0.011435	0.017666	2	-2.3331
Ankrd9	322	4	0.011483	0.017691	1	-6.1095
Supv3l1	323	4	0.011615	0.018052	2	-4.2171
Trib1	324	4	0.011685	0.018227	1	-6.1042
Xpo4	325	4	0.011735	0.018284	1	-6.1032
Sf3b4	326	4	0.011747	0.018284	2	-4.0479
Fam150b	327	4	0.011786	0.018308	1	-6.1025
Lyrm2	328	4	0.011789	0.018308	2	-2.5754
Mfsd7c	329	4	0.011836	0.018308	1	-6.1006
Mical2	330	4	0.011942	0.018611	2	-2.3832
Psme4	331	4	0.011987	0.018678	1	-5.6106
Deb1	332	4	0.012038	0.018705	1	-6.0961
Eci2	333	4	0.012088	0.018705	1	-6.0936
Cdo1	334	4	0.012102	0.018719	2	-4.3819
Sde2	335	3	0.012113	0.018333	1	-5.9241
Iqck	336	4	0.01216	0.018873	2	-2.6106
Ctdsp1	337	4	0.01229	0.019209	1	-6.0892
Trpm1	338	4	0.012316	0.019209	2	-2.2977
Adamts10	339	4	0.012341	0.019209	1	-6.0874
Osbpl9	340	4	0.012426	0.019356	2	-2.0726
Ppip5k1	341	4	0.012492	0.019441	1	-5.5931
Atr	342	4	0.012542	0.019468	1	-5.3252
Gbp7	343	4	0.012655	0.019586	2	-3.1685
Kdm8	344	4	0.012827	0.020046	2	-2.8677
Ncbp1	345	4	0.012845	0.020057	1	-6.0646
B3gnt2	346	4	0.012863	0.020073	2	-3.5328
Mios	347	4	0.013009	0.020299	2	-3.7809
Slc10a6	348	4	0.013033	0.020327	2	-3.7402
Phf20l1	349	4	0.013047	0.020345	1	-4.7659
Acly	350	4	0.01324	0.020752	2	-4.0423
Slc4a7	351	4	0.013358	0.02113	2	-3.7978
Skil	352	4	0.0134	0.021131	1	-5.4823
Gm14479	353	4	0.0135	0.021258	1	-6.0234
Dnajc17	354	4	0.013503	0.021258	2	-3.1422
Atg9a	355	4	0.013551	0.021258	1	-6.0215
Cdca7	356	4	0.013571	0.021269	2	-3.0593
Hist1h2ab	357	4	0.013755	0.021764	2	-3.3312
Ints7	358	4	0.013768	0.021765	2	-3.8276
Fam179b	359	4	0.013802	0.021788	2	-3.3091
Mrpl34	360	4	0.013803	0.021788	1	-6.0085
Tab2	361	4	0.013854	0.021952	2	-3.332
Tnn	362	4	0.013905	0.022164	2	-2.0436
Idh3b	363	4	0.014002	0.022345	2	-3.1666
Slmo2	364	3	0.014006	0.019838	1	-5.834
Pwwp2a	365	4	0.014029	0.02237	2	-4.2061
Paxbp1	366	4	0.014055	0.022387	1	-6.0024
Ube2i	367	4	0.014105	0.022435	1	-6.0016
Mast1	368	4	0.014105	0.022435	2	-2.219
Lysmd3	369	4	0.014155	0.022483	1	-5.9978
Rpusd4	370	4	0.014185	0.022519	2	-3.9176
Mto1	371	4	0.014206	0.022535	1	-5.2549
Pan2	372	4	0.014209	0.022535	2	-3.2812
Birc6	373	4	0.014278	0.022689	2	-3.6826
Zzef1	374	4	0.014307	0.022718	1	-5.9907
AK010878	375	4	0.014357	0.022732	1	-5.5049
Bhlhe41	376	4	0.014474	0.022938	2	-2.2221
Agxt	377	4	0.014508	0.022949	1	-3.8896
Helz	378	4	0.014544	0.022978	2	-3.3283
Zfp773	379	4	0.014558	0.022993	1	-4.4812
Dclre1b	380	4	0.014609	0.023037	1	-5.9832
Usp18	381	4	0.014614	0.023038	2	-3.1695
Sap25	382	4	0.014659	0.023083	1	-5.9829
Cenpo	383	4	0.014716	0.023132	2	-3.8695
Fam117b	384	4	0.014726	0.023133	2	-3.3431
Copb1	385	4	0.01476	0.023165	1	-5.9815
Ccdc53	386	4	0.01481	0.023194	1	-5.9813
Dhx36	387	4	0.01486	0.023234	1	-5.9777
Ank	388	4	0.014903	0.023298	2	-2.7393
Mtl5	389	4	0.014911	0.023299	1	-5.9758
Hecw2	390	4	0.014917	0.023299	2	-3.3858
Ccdc18	391	4	0.015067	0.023584	2	-1.9612
Gm20604	392	4	0.015081	0.023584	2	-4.6583
Bmp2k	393	4	0.01511	0.023603	2	-2.5424
Strbp	394	4	0.015112	0.023603	1	-5.9711
Ric8b	395	4	0.015163	0.023666	1	-4.2128
9430038I01Rik	396	4	0.015202	0.023716	2	-2.5692
Cd177	397	4	0.015213	0.023717	1	-5.9685
Mms22l	398	4	0.015217	0.023717	2	-3.6299
Fam96b	399	4	0.015314	0.023942	1	-5.4718
Coq2	400	4	0.015317	0.023942	2	-3.7935
Cebpg	401	4	0.015414	0.024162	1	-5.9571
Brd9	402	4	0.015439	0.024199	2	-2.9573
Spdya	403	4	0.015464	0.024249	1	-5.4695
Vcam1	404	4	0.015515	0.024298	1	-5.9538
Dhps	405	4	0.01554	0.024308	2	-4.7551
Esf1	406	4	0.015565	0.024335	1	-5.9527
Ccdc85c	407	4	0.015635	0.024367	2	-4.3202
Irf8	408	4	0.015666	0.024396	2	-4.7469
Timeless	409	4	0.015678	0.024397	2	-4.0302
Gm4477	410	4	0.015766	0.024587	1	-4.3324
Bccip	411	4	0.015817	0.024606	1	-5.9452
Max	412	4	0.015842	0.024606	2	-4.4372
Comp	413	4	0.015917	0.02471	1	-5.3202
Srebf2	414	4	0.015962	0.024778	2	-2.9152
Clp1	415	4	0.015968	0.024778	1	-5.4579
9030624G23Rik	416	3	0.016104	0.021046	1	-5.7444
Atl3	417	4	0.016169	0.025198	1	-5.9236
Rnps1	418	4	0.016197	0.025227	2	-3.4738
Pnma1	419	4	0.016219	0.025265	1	-5.4646
AW146154	420	4	0.016278	0.025312	2	-2.9825
Zfp81	421	4	0.016308	0.025352	2	-4.1669
Igbp1	422	4	0.01632	0.025353	1	-5.9156
Ppap2c	423	4	0.016389	0.0254	2	-2.5329
Zfp598	424	4	0.016395	0.0254	1	-5.9151
Ikbkap	425	4	0.016395	0.0254	1	-5.9151
B4galnt1	426	4	0.016471	0.025437	1	-4.5553
Spsb4	427	4	0.016571	0.02567	1	-5.9101
Zfp341	428	4	0.016605	0.02567	2	-2.7697
Clcc1	429	4	0.016672	0.025862	1	-5.9052
Gstp2	430	4	0.016722	0.02588	1	-5.9021
Mettl6	431	4	0.016772	0.025944	1	-5.8997
1110059G10Rik	432	4	0.016823	0.026012	1	-4.9169
Taf6	433	4	0.016897	0.026133	2	-4.3758
Psma1	434	4	0.016897	0.026133	2	-3.8392
Thumpd1	435	4	0.017024	0.026319	1	-5.8929
Phf2	436	4	0.01707	0.02637	2	-3.1208
Qars	437	4	0.017074	0.02637	1	-5.8924
Aasdh	438	4	0.017124	0.026406	1	-4.0405
Phka1	439	4	0.017153	0.026439	2	-3.1937
Rttn	440	4	0.017244	0.026742	2	-3.0802
2210404O09Rik	441	4	0.017259	0.026742	2	-2.6877
Mat2a	442	4	0.017325	0.02692	1	-5.8809
Ggh	443	4	0.017375	0.026974	1	-4.3395
Aagab	444	4	0.017426	0.027007	1	-5.8785
Rapgef3	445	4	0.017457	0.027055	2	-2.3117
Pdcd11	446	4	0.017465	0.027055	2	-3.2748
Ccdc101	447	4	0.017476	0.027055	1	-2.6524
Ap3d1	448	4	0.017576	0.027233	1	-4.7724
Asl	449	4	0.017602	0.027253	2	-2.7018
Spdl1	450	4	0.017677	0.027484	1	-5.8719
Ddx11	451	4	0.017702	0.027504	2	-4.1134
Clcn7	452	4	0.017755	0.027657	2	-2.917
Yme1l1	453	4	0.017763	0.027658	2	-4.3145
Akap8l	454	4	0.017771	0.027658	2	-2.8434
Hexb	455	4	0.017832	0.027803	2	-2.6506
Dgat1	456	4	0.017878	0.027855	1	-5.8648
Arf6	457	4	0.017894	0.027869	2	-3.0381
Tekt2	458	4	0.017978	0.028027	1	-3.1651
Npff	459	4	0.018033	0.028081	2	-3.0558
Kcnj9	460	4	0.018196	0.028477	2	-2.6939
Espl1	461	4	0.018212	0.028478	2	-3.4316
Pacsin2	462	4	0.01838	0.028795	1	-5.8436
Zfp947	463	4	0.018383	0.028795	2	-3.0601
Hebp1	464	4	0.01843	0.02884	1	-4.8177
Tmtc3	465	4	0.018438	0.02884	2	-2.4124
Erh	466	4	0.018477	0.028859	2	-3.5303
Klhl20	467	4	0.018481	0.028859	1	-5.8395
Trappc3	468	4	0.018581	0.029021	1	-5.8363
Elp2	469	4	0.018681	0.029113	1	-5.8296
Cnot2	470	4	0.018685	0.02912	2	-4.5392
Prkcq	471	4	0.018791	0.029482	2	-3.6605
2020-09-07	472	4	0.018832	0.02953	1	-5.8241
Fam45a	473	4	0.018854	0.029531	2	-2.2552
Adarb1	474	4	0.018882	0.029547	1	-5.8204
Elmo2	475	4	0.018917	0.029593	2	-2.6705
Derl2	476	4	0.018932	0.029593	1	-5.8192
Eif3i	477	2	0.019003	0.017528	1	-5.3251
7420461P10Rik	478	4	0.019005	0.029612	2	-3.3156
Hmgcs2	479	4	0.019028	0.029647	2	-2.3362
Tmem189	480	4	0.019083	0.029717	1	-5.8148
Champ1	481	4	0.019084	0.029717	2	-2.7458
C5ar1	482	4	0.019108	0.02973	2	-2.628
Zfp771	483	4	0.019233	0.029946	1	-3.789
Ceacam1	484	4	0.019259	0.029991	2	-2.3837
Adsl	485	4	0.019363	0.030086	2	-4.2465
Cyp27a1	486	4	0.019371	0.030087	2	-2.5224
Slc31a1	487	4	0.019384	0.030105	1	-5.293
Inpp4a	488	4	0.019534	0.030339	1	-3.4978
Taf1c	489	4	0.019539	0.030339	2	-4.217
P4ha1	490	4	0.019547	0.030339	2	-1.7823
Usp12	491	4	0.019563	0.03034	2	-2.9687
Zmym4	492	4	0.019611	0.030377	2	-2.1611
Srsf5	493	4	0.019628	0.030393	2	-4.1906
Slc30a1	494	4	0.019685	0.030427	1	-5.7973
Aamdc	495	4	0.019692	0.030427	2	-2.4029
Arpc4	496	3	0.019707	0.023928	1	-5.5931
Galnt7	497	4	0.019735	0.030477	1	-4.5234
Rala	498	4	0.019785	0.030477	1	-5.3089
Aldh1l2	499	4	0.019835	0.030495	1	-3.9148
Tkt	500	4	0.01991	0.030655	2	-3.3884
Tulp4	501	4	0.019936	0.030675	1	-5.0185
Ndufb9	502	4	0.019942	0.030675	2	-2.8712
Evi2b	503	4	0.020036	0.03087	1	-2.8927
Mrpl28	504	4	0.020056	0.03087	2	-4.1693
Tspan5	505	4	0.020086	0.030871	1	-5.7867
Nrm	506	4	0.020105	0.030871	2	-3.1589
Bod1l	507	4	0.020113	0.030871	2	-3.0857
Ssc5d	508	4	0.020136	0.030881	1	-5.0928
Spink5	509	4	0.020162	0.030881	2	-3.739
Man1c1	510	4	0.020187	0.0309	1	-3.4243
Hsf4	511	4	0.020237	0.03096	1	-5.2809
Emc6	512	4	0.020287	0.030996	1	-5.7832
Sdha	513	4	0.020292	0.030996	2	-2.6882
Slc37a4	514	4	0.020337	0.031044	1	-4.7775
Lrrc3	515	4	0.020366	0.031044	2	-3.6586
Wac	516	4	0.020407	0.031065	2	-4.0637
Upf3a	517	4	0.020431	0.031066	2	-2.3143
Gm5346	518	4	0.020437	0.031066	1	-5.7795
Akap1	519	4	0.020487	0.031108	1	-4.2699
Wdr27	520	4	0.020546	0.03129	2	-2.0125
Tbca	521	4	0.020563	0.03129	2	-4.2625
Pomp	522	4	0.020688	0.031585	1	-5.7643
Ncoa4	523	4	0.020736	0.031642	2	-3.0884
Stip1	524	3	0.020781	0.024816	1	-5.5606
Eef1g	525	2	0.02083	0.019379	1	-5.2337
Gm14393	526	4	0.020888	0.032145	1	-5.7586
Plrg1	527	4	0.020938	0.032181	1	-5.7584
Ccdc63	528	4	0.020942	0.032182	2	-3.0953
Slc11a1	529	4	0.020989	0.032225	1	-4.7579
Cyth2	530	4	0.021189	0.032328	1	-5.7491
Lars2	531	4	0.021289	0.032328	1	-5.7468
Tdp1	532	4	0.021339	0.032328	1	-5.1526
Mrpl20	533	4	0.021414	0.032328	1	-5.7444
Pcyt2	534	3	0.021628	0.025442	1	-5.5351
Lxn	535	4	0.021665	0.032659	1	-5.248
Eogt	536	4	0.021665	0.032659	1	-5.7374
Rad21	537	4	0.02179	0.032779	1	-5.7368
Kin	538	4	0.02184	0.03278	1	-5.0647
Eif6	539	4	0.022291	0.033338	1	-5.7264
Tgif1	540	4	0.022391	0.033339	1	-3.8223
Opa3	541	4	0.022441	0.033339	1	-3.1437
Csnk2b	542	4	0.022541	0.033444	1	-5.7144
Rnf111	543	4	0.022591	0.033444	1	-3.8293
Vmn1r58	544	4	0.022641	0.033444	1	-5.7128
Sf3a3	545	3	0.022681	0.026354	1	-5.5049
Spata2	546	4	0.022691	0.033444	1	-5.7118
Mapkapk2	547	4	0.022741	0.033444	1	-4.8767
Pdia4	548	4	0.022992	0.033798	1	-5.7041
Klhl26	549	4	0.023042	0.033799	1	-5.7027
Gpr34	550	4	0.023142	0.033919	1	-4.3626
Wash1	551	4	0.023242	0.03392	1	-5.6928
Mrpl23	552	4	0.023392	0.034031	1	-5.6913
Igsf11	553	4	0.023442	0.034031	1	-5.6906
Mccc2	554	4	0.023542	0.034031	1	-5.6866
Asap1	555	4	0.023592	0.034031	1	-5.6864
Zfp593	556	4	0.023642	0.034031	1	-2.6389
Des	557	4	0.023742	0.034031	1	-5.6827
Lrriq3	558	3	0.023772	0.027173	1	-5.4642
Tspan15	559	4	0.023842	0.034131	1	-5.6799
Thg1l	560	4	0.024017	0.034369	1	-5.6754
Mepce	561	4	0.024017	0.034369	1	-5.6754
Lgals9	562	4	0.024092	0.034369	1	-4.0763
Ube2f	563	4	0.024142	0.034369	1	-5.6727
Rbl2	564	4	0.024342	0.034605	1	-3.1262
Srp68	565	4	0.024442	0.034713	1	-5.6574
Pnpla2	566	4	0.024542	0.034713	1	-5.6547
Zhx3	567	4	0.024642	0.034713	1	-5.6511
1700023F06Rik	568	3	0.024748	0.027527	1	-4.9939
Nmt2	569	4	0.024792	0.034921	1	-5.1613
Tial1	570	4	0.024842	0.034921	1	-5.0805
Syt11	571	4	0.024991	0.03503	1	-4.6624
2020-03-01	572	8	0.025176	0.040644	1	-6.0757
Agpat9	573	4	0.025191	0.035258	1	-5.6297
Kctd3	574	4	0.025241	0.035258	1	-5.1385
Tmem171	575	4	0.025341	0.035368	1	-5.6215
Cxcl14	576	4	0.025391	0.035368	1	-2.544
Zfp82	577	4	0.025441	0.035368	1	-5.617
Prkar1a	578	4	0.025541	0.035488	1	-5.6127
Grhl1	579	4	0.025591	0.035489	1	-4.8837
Nab2	580	4	0.025691	0.035599	1	-4.7886
Pole4	581	4	0.025741	0.0356	1	-5.6064
Cox7a1	582	4	0.025791	0.0356	1	-5.6031
Rpl22l1	583	4	0.02594	0.03584	1	-5.5971
Mfsd6	584	4	0.02599	0.035841	1	-5.5968
Slc38a2	585	4	0.02624	0.036075	1	-5.5928
Acaca	586	4	0.02629	0.036075	1	-5.592
Col23a1	587	4	0.02634	0.036076	1	-5.5915
Cd74	588	4	0.02639	0.036076	1	-3.0294
Dnajc14	589	4	0.026439	0.036076	1	-5.5879
Actr5	590	4	0.026489	0.036076	1	-3.9439
Pcf11	591	4	0.026589	0.036184	1	-5.5836
Trim21	592	4	0.026639	0.036185	1	-4.6917
Sms	593	4	0.026839	0.036415	1	-5.5764
Psg16	594	4	0.026888	0.036416	1	-4.5027
Slc1a5	595	4	0.026988	0.036518	1	-5.574
Akirin1	596	4	0.027038	0.036518	1	-5.5737
Ttc5	597	4	0.027138	0.036637	1	-5.5701
Sgol1	598	3	0.027187	0.028995	1	-4.004
Tmem168	599	4	0.027188	0.036638	1	-5.5699
Cct2	600	3	0.027262	0.028995	1	-5.3596
Ifitm1	601	4	0.027437	0.036962	1	-4.6201
Uros	602	3	0.0276	0.02908	1	-4.8581
Ctu2	603	4	0.027612	0.037198	1	-5.5606
Dfna5	604	4	0.027686	0.037199	1	-3.3004
Kif18a	605	4	0.027836	0.037304	1	-5.5549
Krr1	606	3	0.027937	0.029248	1	-4.8515
Nr1d1	607	4	0.028035	0.037529	1	-5.5506
Mre11a	608	4	0.02811	0.037529	1	-5.55
Gclc	609	4	0.028185	0.037529	1	-5.549
Ing3	610	4	0.028285	0.037529	1	-5.5469
Sema4a	611	4	0.028334	0.037529	1	-5.5428
Eif4e2	612	4	0.028434	0.037652	1	-5.0518
Hoxa11	613	4	0.028534	0.03775	1	-4.4109
Tsg101	614	4	0.028683	0.037974	1	-5.5357
Wdr33	615	4	0.028783	0.037975	1	-5.5349
Olfr209	616	4	0.028833	0.037975	1	-2.9801
Ppp6c	617	3	0.028874	0.029808	1	-5.3057
Gca	618	4	0.028882	0.037975	1	-3.6126
Dcaf7	619	4	0.028982	0.038076	1	-5.5283
Cdk11b	620	4	0.029181	0.03842	1	-5.5231
Ctso	621	4	0.029231	0.03842	1	-3.5377
Card6	622	4	0.02943	0.038544	1	-5.5196
Mrpl9	623	4	0.02953	0.038654	1	-5.5183
Ccar1	624	4	0.029679	0.038895	1	-5.1051
Tlr6	625	4	0.029779	0.038896	1	-4.7325
Sf3a1	626	3	0.029847	0.030921	1	-5.273
Nt5dc3	627	4	0.029878	0.039024	1	-5.1033
Ngrn	628	4	0.029978	0.039136	1	-4.7153
Gm3604	629	4	0.030028	0.039136	1	-3.9495
Taf1b	630	4	0.030077	0.039136	1	-5.5052
0610030E20Rik	631	4	0.030177	0.039137	1	-5.5045
Fcer1g	632	4	0.030227	0.039137	1	-3.4147
Ccnc	633	4	0.030276	0.039137	1	-5.498
Matr3	634	3	0.030408	0.031471	1	-5.2487
Rdh5	635	4	0.030426	0.039365	1	-2.7713
Cog7	636	4	0.030475	0.039365	1	-5.4932
Usp10	637	4	0.030774	0.039953	1	-3.4164
Zfr	638	4	0.030873	0.039954	1	-3.9555
Ttc37	639	3	0.030894	0.031934	1	-5.2376
Wdr4	640	4	0.031072	0.040068	1	-5.4811
Fbxw4	641	4	0.031122	0.040068	1	-3.1754
Slc22a21	642	4	0.03137	0.040169	1	-5.4727
Rhou	643	3	0.031381	0.032395	1	-2.9205
Rnf126	644	4	0.03142	0.040169	1	-2.5865
F11r	645	4	0.03147	0.04017	1	-3.9115
Zfp710	646	4	0.031619	0.04017	1	-4.7627
Metap2	647	4	0.031718	0.040283	1	-5.4628
Ccdc62	648	4	0.031942	0.040396	1	-5.4593
Xpo5	649	4	0.031942	0.040396	1	-5.4593
Map2k5	650	4	0.032166	0.040505	1	-4.7691
Slc25a38	651	4	0.032215	0.040505	1	-5.4578
Ddx24	652	4	0.032315	0.040506	1	-5.4569
Trim32	653	4	0.032364	0.040506	1	-4.9675
Hnrnpf	654	4	0.032414	0.040506	1	-5.4538
Ddx54	655	3	0.032502	0.033497	1	-5.1983
Atp5h	656	4	0.032563	0.04061	1	-5.4469
Ggn	657	4	0.032613	0.04061	1	-3.8457
Kifc3	658	4	0.032662	0.04061	1	-4.8305
Sdhaf2	659	4	0.032712	0.04061	1	-5.4436
Adrbk1	660	4	0.032762	0.04061	1	-4.8294
Nat10	661	3	0.032763	0.033913	1	-5.1912
Cptp	662	4	0.032811	0.040611	1	-4.7574
Hist2h2bb	663	4	0.032911	0.040611	1	-5.4404
Prodh2	664	4	0.03296	0.040611	1	-3.4842
Morc3	665	4	0.03301	0.040611	1	-5.4387
Atf2	666	4	0.033109	0.040719	1	-4.9856
Hdac9	667	4	0.033159	0.040719	1	-3.0695
Mkx	668	4	0.033209	0.040719	1	-5.4304
Wfdc17	669	4	0.033308	0.040825	1	-5.4286
Chpt1	670	3	0.033323	0.034465	1	-4.1301
Snip1	671	4	0.033358	0.040825	1	-4.9782
Ndufaf5	672	4	0.033407	0.040826	1	-5.0257
Trmt6	673	4	0.033457	0.040826	1	-5.4223
Gm11710	674	4	0.033556	0.040936	1	-5.4177
Isoc2b	675	4	0.033755	0.041153	1	-5.4154
Stk40	676	4	0.033804	0.041154	1	-2.8658
Leo1	677	4	0.033854	0.041154	1	-5.4096
Tk1	678	4	0.033903	0.041154	1	-4.5828
Derl1	679	4	0.034003	0.041252	1	-5.4051
Prkd2	680	4	0.034052	0.041252	1	-3.2903
Atpaf1	681	4	0.034102	0.041252	1	-2.7161
Plekhg4	682	4	0.034151	0.041252	1	-4.0239
Mrpl22	683	4	0.034201	0.041252	1	-5.4024
Icosl	684	4	0.034251	0.041252	1	-3.3069
Ntan1	685	4	0.0343	0.041252	1	-4.1728
Prpf31	686	4	0.03435	0.041252	1	-5.4001
Rab29	687	4	0.034399	0.041252	1	-4.6466
Nucks1	688	4	0.034449	0.041252	1	-3.112
Slx1b	689	4	0.034499	0.041252	1	-3.9558
Tbp	690	4	0.034598	0.041367	1	-5.3913
Maf1	691	4	0.034647	0.041368	1	-4.9515
Ppil3	692	4	0.034796	0.041585	1	-3.5589
Myo1b	693	4	0.034895	0.041704	1	-3.1798
Farsa	694	4	0.034945	0.041704	1	-5.3868
Mrpl50	695	4	0.035193	0.041943	1	-4.9862
L1cam	696	4	0.035292	0.041944	1	-3.9046
Zfp740	697	4	0.035341	0.041944	1	-4.3705
Vac14	698	4	0.03549	0.042158	1	-5.3745
Pafah1b2	699	4	0.03554	0.042158	1	-4.9786
Adh5	700	4	0.035589	0.042158	1	-5.3724
Zbtb20	701	4	0.035688	0.042263	1	-3.8684
Lemd2	702	4	0.035738	0.042263	1	-5.3687
Itgb2	703	4	0.035787	0.042263	1	-3.2426
Srp54b	704	4	0.035986	0.04249	1	-5.363
6330408A02Rik	705	4	0.036035	0.04249	1	-3.9004
Pbx4	706	4	0.036283	0.04249	1	-4.1914
Hmox2	707	4	0.036332	0.04249	1	-3.8118
Rmdn1	708	4	0.036382	0.04249	1	-4.0094
Arhgef37	709	4	0.03653	0.04249	1	-3.693
Rasgrp2	710	4	0.036679	0.042597	1	-4.036
Akip1	711	4	0.036728	0.042597	1	-1.7436
Tmem50a	712	4	0.036778	0.042597	1	-3.2902
Mesdc1	713	4	0.036827	0.042597	1	-3.2652
Lrpap1	714	4	0.036926	0.04271	1	-4.9129
Rae1	715	4	0.037025	0.042824	1	-4.4696
Sectm1a	716	4	0.037124	0.042824	1	-2.3336
Topors	717	4	0.037174	0.042824	1	-4.2723
Psmd5	718	4	0.037223	0.042824	1	-5.3392
Otub2	719	3	0.037275	0.038516	1	-5.0895
Orc3	720	4	0.037322	0.042824	1	-5.3371
Hdac7	721	4	0.037372	0.042824	1	-5.3371
Acox3	722	4	0.03757	0.043041	1	-4.2099
Gzmm	723	4	0.037817	0.043264	1	-4.2197
Sil1	724	4	0.037867	0.043264	1	-5.3177
Nsun4	725	4	0.037916	0.043265	1	-5.3163
Slc7a11	726	4	0.038163	0.043479	1	-3.0534
Fam69c	727	4	0.038213	0.043479	1	-4.5003
Chst7	728	4	0.038262	0.043479	1	-5.3069
Sos2	729	4	0.038361	0.043479	1	-4.4977
Apol6	730	4	0.038509	0.043698	1	-4.427
Vmn2r108	731	4	0.038707	0.043914	1	-3.3443
Man1a2	732	4	0.038757	0.043915	1	-4.9083
Rpl12	733	3	0.038801	0.039965	1	-4.1612
Eif3a	734	4	0.038954	0.044143	1	-4.4871
Pam	735	4	0.039004	0.044143	1	-3.2732
Ly6i	736	4	0.039053	0.044143	1	-4.1404
Hjurp	737	3	0.039154	0.040056	1	-5.059
Emc7	738	4	0.03935	0.044593	1	-4.2864
4930524N10Rik	739	4	0.039399	0.044594	1	-4.8551
Lrrc49	740	4	0.039597	0.044818	1	-5.273
Aasdhppt	741	4	0.039597	0.044818	1	-5.273
Btbd1	742	4	0.039745	0.044925	1	-5.2691
Rpl27a	743	3	0.039749	0.040634	1	-5.0436
Trpc1	744	4	0.039794	0.044925	1	-5.2689
Bcor	745	4	0.039844	0.044925	1	-4.4846
Tex30	746	4	0.039893	0.044925	1	-4.1714
Hyal1	747	4	0.040041	0.045039	1	-5.2589
Chaf1b	748	4	0.040436	0.04552	1	-3.9709
Gnl3	749	4	0.040535	0.045631	1	-5.2463
Tfr2	750	4	0.040831	0.045863	1	-3.1576
Rpl8	751	3	0.040845	0.041156	1	-5.0212
Fthl17	752	4	0.041078	0.046237	1	-2.8088
Oit3	753	4	0.041472	0.0466	1	-3.2739
Adam10	754	4	0.041522	0.0466	1	-5.2288
N4bp2l2	755	4	0.04167	0.046708	1	-4.1059
Nip7	756	4	0.041916	0.047043	1	-4.8448
Ermard	757	4	0.041966	0.047043	1	-4.7321
Rusc2	758	4	0.042064	0.047148	1	-4.6689
Gm7861	759	4	0.042163	0.047259	1	-5.2171
Micu3	760	3	0.042182	0.042234	1	-4.9988
Dis3	761	4	0.042261	0.047375	1	-5.2161
Mrpl24	762	4	0.04236	0.047484	1	-5.212
Copa	763	3	0.042404	0.042414	1	-4.9952
Rps2	764	1	0.042433	0.037525	1	-3.9182
Gm4787	765	4	0.042458	0.047485	1	-5.2101
Gm1661	766	4	0.042606	0.047595	1	-4.376
Unk	767	4	0.042656	0.047595	1	-5.2068
Pik3ip1	768	4	0.042754	0.047707	1	-4.7987
Ccdc163	769	4	0.042853	0.047811	1	-5.2052
Kidins220	770	4	0.043	0.047933	1	-4.371
Tyms	771	3	0.043109	0.042844	1	-3.3461
2410127L17Rik	772	4	0.043444	0.048564	1	-4.7018
Siglecf	773	4	0.043542	0.048622	1	-3.1874
Pus3	774	4	0.043592	0.048622	1	-2.7373
Rnf4	775	4	0.043641	0.048622	1	-4.3645
B3galt6	776	4	0.043739	0.048732	1	-4.7194
Ptpn7	777	4	0.043789	0.048733	1	-2.3075
Rplp2	778	2	0.043807	0.038805	1	-4.6119
Fam96a	779	4	0.043936	0.048976	1	-4.298
Rps19	780	3	0.04398	0.043416	1	-4.9637
Fgfr1	781	3	0.04398	0.043416	1	-4.9637
Stc1	782	4	0.044133	0.049329	1	-5.1815
Naa35	783	3	0.044221	0.043555	1	-4.9571
Nono	784	4	0.044379	0.049557	1	-3.4213
Arl4a	785	4	0.044478	0.049656	1	-3.2858
Tmem199	786	4	0.044576	0.049777	1	-5.1771
Ddx31	787	3	0.044628	0.043829	1	-4.9479
Nol10	788	4	0.044674	0.04988	1	-5.1769
Impdh2	789	4	0.045019	0.05034	1	-3.6189
Wdr61	790	4	0.045117	0.05034	1	-4.471
Btg2	791	4	0.045216	0.050341	1	-3.2887
Hoxb4	792	4	0.045265	0.050341	1	-3.9199
2010315B03Rik	793	4	0.045314	0.050341	1	-5.1639
Mrpl48	794	4	0.045437	0.050463	1	-5.1629
Psmb4	795	3	0.045536	0.044264	1	-4.936
Rps6kb2	796	4	0.045609	0.05069	1	-3.6195
Kif23	797	4	0.045658	0.05069	1	-5.1599
Anp32e	798	4	0.045707	0.05069	1	-3.8914
Atp5g2	799	4	0.045756	0.05069	1	-4.6757
Tbc1d9b	800	4	0.045806	0.05069	1	-5.1558
Hgd	801	4	0.045953	0.050797	1	-4.6088
Itpka	802	4	0.046051	0.050908	1	-2.7063
C4b	803	4	0.046199	0.051146	1	-2.8284
Rps13	804	2	0.046245	0.040985	1	-4.5659
Uqcc1	805	4	0.046248	0.051147	1	-5.1485
1110008F13Rik	806	4	0.046297	0.051147	1	-5.1476
Btg1	807	4	0.046494	0.051376	1	-3.49
Hsd17b4	808	4	0.046592	0.05149	1	-5.1435
Dcxr	809	4	0.04669	0.051601	1	-3.8755
Tmem50b	810	4	0.046788	0.0517	1	-5.1418
Slc25a5	811	4	0.046837	0.051701	1	-5.1387
Ptpn11	812	4	0.046936	0.051817	1	-3.3808
Nck2	813	4	0.047181	0.052147	1	-5.1305
Tmem2	814	4	0.047279	0.052278	1	-4.2039
Iws1	815	4	0.047328	0.052278	1	-5.1285
Ctif	816	4	0.047378	0.052279	1	-4.5253
Arhgef11	817	4	0.047427	0.052279	1	-3.5587
Mthfd2l	818	4	0.047476	0.052279	1	-5.1248
Cyp2d26	819	4	0.047574	0.052396	1	-3.6102
Nup50	820	4	0.047795	0.052792	1	-5.1202
Ylpm1	821	3	0.047903	0.046473	1	-4.8887
Fis1	822	4	0.048065	0.053311	1	-5.1138
Casc3	823	4	0.048212	0.053439	1	-3.9371
Myef2	824	4	0.048261	0.05344	1	-3.6144
Mrpl2	825	4	0.048359	0.053546	1	-5.1098
Trio	826	4	0.048408	0.053547	1	-4.0353
Kirrel	827	4	0.048457	0.053547	1	-3.0868
Thyn1	828	4	0.048604	0.053778	1	-5.1047
Srgn	829	4	0.048703	0.053779	1	-5.1034
Sub1	830	4	0.048801	0.053885	1	-3.2069
Olfr986	831	4	0.04885	0.053885	1	-3.2442
Pnp	832	4	0.048899	0.053886	1	-4.5675
Cyp2d9	833	4	0.048948	0.053886	1	-2.9224
G0s2	834	4	0.049144	0.054226	1	-5.0944
Etv5	835	4	0.049242	0.054339	1	-4.5639
Cd36	836	4	0.049291	0.054339	1	-3.5719
Fam204a	837	4	0.049487	0.05446	1	-3.9765
Tysnd1	838	4	0.049585	0.054574	1	-3.3628
Slco4a1	839	4	0.049732	0.05469	1	-2.5774
Pi4k2b	840	4	0.049879	0.054908	1	-3.8702
Fam83d	841	4	0.049977	0.055015	1	-4.2298
Smc1a	842	4	0.050026	0.055015	1	-5.0823
Siae	843	4	0.050197	0.055235	1	-5.0798
Atp2a2	844	4	0.050197	0.055235	1	-5.0798
Atf3	845	4	0.050271	0.055236	1	-3.5935
Siah2	846	4	0.050369	0.055358	1	-3.4531
Ncor1	847	4	0.050491	0.055484	1	-5.0743
Csnk1d	848	4	0.050491	0.055484	1	-5.0743
Dock10	849	4	0.050761	0.055825	1	-2.8065
Mettl23	850	4	0.050908	0.056047	1	-4.1631
Hist1h2bm	851	4	0.051103	0.056171	1	-3.4835
Fbxo34	852	3	0.051133	0.048901	1	-3.3281
Atp5c1	853	4	0.051201	0.056171	1	-5.0655
Yipf3	854	4	0.05125	0.056171	1	-4.3299
Zfp955b	855	4	0.051446	0.056172	1	-4.6129
Rit1	856	4	0.051593	0.056172	1	-3.4446
Unc45a	857	4	0.05174	0.056294	1	-4.0375
Tmub2	858	4	0.051935	0.056295	1	-2.0918
Mmp19	859	4	0.052082	0.056509	1	-4.471
0610009O20Rik	860	4	0.052229	0.056625	1	-4.0328
Ywhag	861	4	0.052278	0.056625	1	-3.0445
Pon1	862	4	0.052424	0.056849	1	-3.3798
Spata7	863	4	0.052522	0.056966	1	-5.0461
Ranbp6	864	4	0.052571	0.056966	1	-3.4106
Gm14322	865	4	0.052767	0.057083	1	-5.0429
Cdca4	866	4	0.052816	0.057084	1	-2.4504
Pnrc1	867	4	0.052962	0.057312	1	-4.6025
Sec31a	868	4	0.053036	0.057372	1	-5.0413
Acsm1	869	4	0.053158	0.057432	1	-3.5758
Trmt10c	870	4	0.053256	0.057556	1	-3.5419
Clhc1	871	4	0.053304	0.057556	1	-5.0338
Rpl36a	872	4	0.053353	0.057556	1	-5.0324
Mtmr9	873	4	0.053402	0.057556	1	-5.0317
Clint1	874	4	0.053451	0.057556	1	-4.0842
Rbbp6	875	4	0.053646	0.057556	1	-5.0289
Asah2	876	4	0.05372	0.057556	1	-5.0282
Zbtb14	877	4	0.053817	0.057556	1	-5.0279
BC017643	878	4	0.053891	0.057556	1	-5.027
Mbl2	879	4	0.053939	0.057556	1	-5.0263
Arhgap12	880	4	0.054281	0.058009	1	-4.3082
Tfrc	881	4	0.054379	0.05801	1	-5.0164
Adra1a	882	4	0.054428	0.05801	1	-5.0133
Zyx	883	4	0.054525	0.058099	1	-3.0411
Ercc4	884	4	0.054574	0.058099	1	-5.0126
Skiv2l2	885	4	0.054648	0.0581	1	-5.0121
Det1	886	4	0.054721	0.0581	1	-3.9581
Mycl	887	4	0.054867	0.058214	1	-3.3538
Rab10	888	4	0.054916	0.058214	1	-3.7634
Lrch1	889	4	0.054965	0.058214	1	-4.2268
Pithd1	890	4	0.05516	0.058429	1	-4.5061
Ccdc66	891	4	0.055258	0.058538	1	-3.3239
H2afj	892	3	0.055331	0.052267	1	-4.7582
Eml4	893	4	0.055404	0.058758	1	-4.5723
Eya4	894	4	0.055453	0.058758	1	-4.1755
1700008I05Rik	895	4	0.055501	0.058758	1	-2.6444
Zfp358	896	4	0.055599	0.058868	1	-3.0353
Pla1a	897	4	0.055697	0.058868	1	-4.0657
Atg7	898	3	0.055845	0.052537	1	-3.0677
Rab18	899	4	0.055916	0.059042	1	-4.9962
Med10	900	4	0.056038	0.059213	1	-4.6236
Prr14l	901	4	0.056087	0.059213	1	-3.1458
Casc5	902	4	0.056184	0.059213	1	-4.995
Klhl28	903	4	0.056379	0.059562	1	-3.9958
Uba7	904	4	0.056428	0.059562	1	-3.0372
2010005H15Rik	905	4	0.056477	0.059562	1	-4.9926
Cpne8	906	4	0.056525	0.059562	1	-4.3539
Npc1	907	4	0.056623	0.059671	1	-4.0434
Srp72	908	4	0.056672	0.059671	1	-4.988
Cox4i1	909	4	0.05672	0.059671	1	-4.4215
Gna11	910	4	0.056818	0.059672	1	-4.6167
Ric8	911	4	0.056867	0.059672	1	-3.43
Hist1h2bh	912	3	0.056911	0.053541	1	-4.7274
Scnm1	913	4	0.056915	0.059672	1	-3.7495
Atp1b3	914	4	0.056988	0.059726	1	-4.9849
Tm4sf1	915	4	0.057208	0.059985	1	-3.014
Tapt1	916	4	0.057256	0.059985	1	-3.5194
Mrpl57	917	4	0.057305	0.059986	1	-4.609
Slc9a5	918	3	0.057425	0.053818	1	-2.805
Cyp3a11	919	4	0.057451	0.060104	1	-4.98
Hmgn1	920	4	0.0575	0.060104	1	-3.1494
Zcchc3	921	4	0.057549	0.060105	1	-4.2195
Hp	922	4	0.057597	0.060105	1	-4.0511
Tmtc1	923	3	0.057645	0.053996	1	-3.0161
Haus6	924	4	0.057719	0.06021	1	-4.973
Sec61a1	925	4	0.057841	0.060319	1	-3.1778
Dusp23	926	4	0.05789	0.060319	1	-3.2686
Zfp948	927	4	0.057987	0.06032	1	-4.5417
Il10	928	4	0.058084	0.060437	1	-3.0065
Atg4c	929	4	0.058206	0.060494	1	-4.9637
Egr4	930	4	0.058425	0.060672	1	-4.2047
Clpp	931	4	0.058474	0.060673	1	-3.2565
Amz2	932	4	0.05862	0.060795	1	-2.6993
Col4a3bp	933	3	0.058636	0.054904	1	-3.1199
Gstm2	934	4	0.058717	0.060912	1	-2.7123
Cpsf1	935	4	0.058766	0.060913	1	-4.9536
Rhbdd1	936	4	0.058863	0.061012	1	-2.3144
Pou2f2	937	4	0.058912	0.061012	1	-4.9509
Katnal1	938	4	0.05896	0.061012	1	-3.5904
Ptpn12	939	4	0.059009	0.061012	1	-3.6558
Ces1e	940	4	0.059106	0.061012	1	-4.5281
Ell	941	4	0.059155	0.061012	1	-4.9472
Cdc73	942	3	0.059442	0.055841	1	-4.6934
Fam167b	943	4	0.059544	0.061117	1	-3.7224
G2e3	944	4	0.059593	0.061117	1	-3.8407
Actr8	945	4	0.059641	0.061117	1	-4.9402
Arid4b	946	4	0.059811	0.061293	1	-4.9382
Fam19a2	947	4	0.059884	0.061351	1	-4.1786
Npepps	948	4	0.059981	0.061352	1	-4.9375
Xiap	949	4	0.060176	0.061578	1	-2.6151
Strn4	950	4	0.060516	0.061887	1	-3.924
Ube2t	951	4	0.060565	0.061887	1	-4.9322
Cfap74	952	4	0.060662	0.061888	1	-3.9172
Brix1	953	3	0.060835	0.057246	1	-4.675
Ccdc59	954	4	0.060856	0.062116	1	-4.9242
Tsn	955	4	0.060905	0.062117	1	-4.1813
Cd2ap	956	4	0.060978	0.062176	1	-4.9206
Cct4	957	3	0.061018	0.057344	1	-4.6723
Dennd2a	958	4	0.06105	0.062235	1	-3.3637
Abhd6	959	3	0.06153	0.057612	1	-3.8416
Smtnl2	960	4	0.061584	0.063016	1	-4.5007
Snrpe	961	3	0.061622	0.057696	1	-4.6615
Odf2l	962	4	0.061633	0.063016	1	-4.912
Fig4	963	4	0.061682	0.063016	1	-4.1607
Higd2a	964	4	0.061779	0.063134	1	-4.91
Pomgnt1	965	4	0.061924	0.063359	1	-2.7644
Cep162	966	4	0.061973	0.06336	1	-2.455
Tssc1	967	3	0.062043	0.058042	1	-4.6533
Crebbp	968	4	0.062118	0.063591	1	-2.726
Rnf149	969	4	0.062264	0.063822	1	-4.9034
Baz1a	970	4	0.062409	0.064045	1	-3.144
Foxk2	971	4	0.062507	0.064046	1	-3.3758
Alkbh1	972	4	0.062555	0.064046	1	-3.065
9130008F23Rik	973	4	0.062652	0.064165	1	-2.9794
Plekhg2	974	4	0.062701	0.064165	1	-3.497
Rab1b	975	4	0.062798	0.064165	1	-2.9429
Gm10696	976	4	0.062895	0.064166	1	-3.4708
Brd2	977	4	0.062943	0.064166	1	-4.1615
Pola1	978	4	0.063089	0.064284	1	-4.8928
Surf4	979	4	0.063137	0.064284	1	-2.2773
Zfp652	980	4	0.063185	0.064284	1	-3.8094
Ctdspl2	981	4	0.063355	0.064284	1	-4.8887
Gon4l	982	3	0.063378	0.058895	1	-4.6334
Gemin7	983	4	0.063428	0.064284	1	-4.8884
St3gal6	984	4	0.063573	0.064284	1	-2.4765
Angptl4	985	4	0.063622	0.064284	1	-4.8856
Vmn1r197	986	4	0.06367	0.064284	1	-3.6529
Rpl35	987	4	0.063937	0.064519	1	-4.8815
Dmap1	988	4	0.063937	0.064519	1	-4.8815
Anks3	989	4	0.064058	0.064617	1	-3.8907
Gmcl1l	990	4	0.064106	0.064617	1	-4.1391
Fcgrt	991	4	0.064155	0.064618	1	-4.8791
Ddx10	992	4	0.064203	0.064618	1	-4.8789
Gtf2f2	993	4	0.064252	0.064618	1	-4.539
Stfa2l1	994	4	0.064397	0.064823	1	-4.5391
Dvl3	995	4	0.064591	0.065069	1	-4.5237
Ecd	996	3	0.064638	0.059445	1	-4.0295
Tmem131	997	4	0.064688	0.065069	1	-3.1646
Selenbp1	998	4	0.064736	0.065069	1	-4.8723
Trim44	999	4	0.064833	0.065069	1	-4.871
Dgkz	1000	4	0.064881	0.065069	1	-3.5278
Gm4763	1001	4	0.065027	0.065183	1	-2.293
Chchd7	1002	4	0.065075	0.065183	1	-4.8671
Rrp1	1003	3	0.065076	0.05972	1	-2.8572
Rgl2	1004	4	0.065123	0.065183	1	-3.9295
Gjb1	1005	4	0.065172	0.065183	1	-3.6781
Stoml2	1006	4	0.065269	0.065183	1	-2.8255
Ctage5	1007	4	0.065365	0.065293	1	-4.8627
9130011E15Rik	1008	4	0.065511	0.065417	1	-4.3191
Fosl2	1009	4	0.065607	0.06553	1	-4.8587
Gtf3a	1010	4	0.065656	0.06553	1	-4.8574
Lgals3bp	1011	4	0.065801	0.065753	1	-3.7859
Fus	1012	4	0.066043	0.066092	1	-4.8492
Pld2	1013	4	0.066091	0.066092	1	-3.6256
Olfr1459	1014	4	0.066236	0.066092	1	-4.0032
Dars2	1015	4	0.066551	0.066431	1	-4.8423
Cfap20	1016	4	0.066551	0.066431	1	-4.8423
Control	1017	984	0.066573	0.095886	41	-2.6331
Rrm2	1018	2	0.066646	0.058954	1	-4.1753
Nap1l1	1019	4	0.066865	0.067022	1	-2.8254
B3gnt3	1020	4	0.066913	0.067022	1	-4.8382
Nckap1l	1021	4	0.06701	0.067136	1	-4.8353
Cx3cl1	1022	4	0.067058	0.067136	1	-3.8031
Sugct	1023	4	0.067179	0.067247	1	-4.8334
Gm2a	1024	4	0.067445	0.067367	1	-4.8313
Erich3	1025	4	0.067638	0.067368	1	-3.2485
Kif2a	1026	4	0.067686	0.067368	1	-2.677
5430427O19Rik	1027	4	0.067783	0.067485	1	-3.3102
Psmd6	1028	4	0.068	0.067828	1	-4.8259
Pik3cb	1029	4	0.068073	0.067829	1	-2.5011
Shisa5	1030	4	0.068121	0.067829	1	-3.3506
Ier5	1031	4	0.068169	0.067829	1	-4.4809
Ssbp4	1032	4	0.068266	0.067929	1	-2.4244
Nefm	1033	3	0.068286	0.062501	1	-2.1748
Lamtor1	1034	4	0.068363	0.06793	1	-4.8226
Scamp2	1035	4	0.068459	0.068047	1	-4.1
Anapc2	1036	4	0.068507	0.068048	1	-4.8205
Tef	1037	4	0.068652	0.068159	1	-4.045
1810024B03Rik	1038	4	0.068845	0.068386	1	-3.5087
Mblac1	1039	4	0.068894	0.068386	1	-3.9837
Nmb	1040	4	0.06899	0.068386	1	-4.8134
Fen1	1041	4	0.069087	0.068509	1	-3.164
1810009A15Rik	1042	4	0.069135	0.068509	1	-4.8123
Wasl	1043	4	0.069183	0.068509	1	-3.7618
Olfr1331	1044	4	0.06928	0.068615	1	-4.0924
Adat2	1045	3	0.069306	0.063248	1	-4.0651
Klhdc4	1046	4	0.069328	0.068615	1	-2.994
Gm608	1047	4	0.069424	0.068615	1	-2.9086
Zfp398	1048	4	0.069473	0.068615	1	-4.8093
Gale	1049	3	0.06956	0.063326	1	-4.548
Aurka	1050	3	0.069615	0.063326	1	-4.5476
4931428F04Rik	1051	4	0.069617	0.068837	1	-4.8082
Cog5	1052	4	0.069665	0.068838	1	-4.4155
Vdac1	1053	4	0.069858	0.06917	1	-3.8367
Snx20	1054	4	0.069907	0.069171	1	-3.6068
Chtf8	1055	4	0.070099	0.069289	1	-4.3519
Tnpo3	1056	4	0.070196	0.069403	1	-4.3506
Pml	1057	4	0.070292	0.069519	1	-3.355
Pqbp1	1058	4	0.070341	0.069519	1	-4.7967
Lin37	1059	4	0.070485	0.06974	1	-3.8699
Mpc2	1060	4	0.070533	0.06974	1	-4.794
Aga	1061	4	0.070582	0.069741	1	-2.2872
Cxx1a	1062	4	0.07063	0.069741	1	-3.4951
Ndst1	1063	4	0.070774	0.069996	1	-3.3083
Itm2c	1064	4	0.070871	0.07012	1	-3.967
Arl15	1065	4	0.071015	0.070218	1	-3.7753
Nf2	1066	4	0.071063	0.070219	1	-4.3326
Cnot3	1067	4	0.071112	0.070219	1	-4.0179
Ecsit	1068	4	0.071208	0.070331	1	-4.7848
Tcerg1	1069	4	0.071352	0.070446	1	-4.7815
Glt8d1	1070	4	0.071401	0.070446	1	-4.7807
Hsd17b12	1071	4	0.071593	0.070661	1	-4.7787
Eid2b	1072	4	0.071641	0.070661	1	-3.1699
Phc2	1073	4	0.07169	0.070662	1	-3.388
Ppard	1074	4	0.071738	0.070662	1	-4.7757
Fam50a	1075	3	0.07196	0.065273	1	-4.0348
Pask	1076	4	0.071978	0.070776	1	-3.8087
Hmgn5	1077	4	0.072027	0.070776	1	-4.7706
Ndufab1	1078	4	0.072075	0.070777	1	-4.7703
Zfp943	1079	4	0.072123	0.070777	1	-3.5198
Uqcrfs1	1080	4	0.072171	0.070777	1	-4.7698
Eif4a2	1081	4	0.072267	0.070877	1	-3.0045
Haus1	1082	3	0.072269	0.065629	1	-4.5085
Mgme1	1083	4	0.072412	0.0711	1	-4.767
Csf2rb2	1084	4	0.07246	0.0711	1	-3.2077
8030462N17Rik	1085	4	0.072556	0.071101	1	-1.9215
Gcnt1	1086	4	0.072652	0.071223	1	-3.804
Hnrnpr	1087	4	0.0727	0.071224	1	-2.921
Tex10	1088	3	0.072723	0.065894	1	-4.5034
Tonsl	1089	4	0.072893	0.071455	1	-4.2466
Cbwd1	1090	4	0.072941	0.071456	1	-3.8038
Il18	1091	4	0.072989	0.071456	1	-2.5656
Pdzd11	1092	4	0.073181	0.071692	1	-3.5116
Tecr	1093	4	0.07323	0.071692	1	-4.7531
Hnrnpa0	1094	4	0.073278	0.071692	1	-4.429
Upf3b	1095	4	0.073326	0.071692	1	-2.4866
Dsn1	1096	4	0.073446	0.071754	1	-4.7517
Taf8	1097	4	0.073446	0.071754	1	-4.7517
Tmem202	1098	4	0.073614	0.071927	1	-4.7511
Ndufa13	1099	3	0.073631	0.066824	1	-3.8859
Abca2	1100	4	0.073662	0.071927	1	-4.7506
Mfge8	1101	4	0.07371	0.071928	1	-2.0798
Tmem18	1102	4	0.073855	0.072047	1	-2.6442
Tnks	1103	4	0.073903	0.072047	1	-3.0976
Gatsl3	1104	4	0.073999	0.072048	1	-3.6024
Trim59	1105	4	0.074287	0.072252	1	-2.8699
Aatf	1106	4	0.074335	0.072253	1	-4.2578
Hspa5	1107	3	0.074991	0.068282	1	-4.471
Wdr60	1108	4	0.075008	0.073141	1	-2.819
Tbcel	1109	4	0.075056	0.073141	1	-3.4798
Npat	1110	4	0.075104	0.073141	1	-4.7279
Mdc1	1111	4	0.0752	0.073142	1	-3.0832
Khnyn	1112	4	0.075248	0.073142	1	-4.3492
Glb1	1113	4	0.075296	0.073142	1	-4.2865
Zfyve16	1114	4	0.075344	0.073142	1	-4.2863
Gps1	1115	3	0.075371	0.068711	1	-4.4662
Gpr180	1116	4	0.075392	0.073142	1	-4.2453
Dock11	1117	4	0.075584	0.073367	1	-3.7066
Ngfrap1	1118	4	0.075632	0.073367	1	-2.7755
Vps25	1119	3	0.075698	0.069084	1	-4.0289
Mt1	1120	4	0.075728	0.073492	1	-2.3314
Bmpr1a	1121	4	0.075776	0.073492	1	-3.9877
Zdhhc21	1122	4	0.075872	0.073493	1	-2.1155
Gm17727	1123	4	0.076016	0.07372	1	-4.0417
G3bp1	1124	4	0.07616	0.073721	1	-2.5313
Parn	1125	4	0.076208	0.073721	1	-3.1453
Pdcd2	1126	4	0.076304	0.073858	1	-4.7166
Atp2c1	1127	4	0.076352	0.073858	1	-3.5085
Mcts1	1128	4	0.076448	0.073978	1	-4.2332
Ddx47	1129	3	0.076476	0.069671	1	-4.4561
Bcl9	1130	4	0.076591	0.074195	1	-4.7131
Dlgap2	1131	4	0.076735	0.074433	1	-3.5718
Hmgb3	1132	4	0.076831	0.074433	1	-4.3363
Fam159b	1133	4	0.076879	0.074434	1	-3.0746
Ncl	1134	4	0.076999	0.074434	1	-4.7058
Rassf3	1135	4	0.076999	0.074434	1	-4.7058
Slc52a3	1136	4	0.077215	0.074761	1	-3.0272
Bloc1s4	1137	4	0.077263	0.074762	1	-3.4099
Park7	1138	4	0.077335	0.074819	1	-4.7035
Tusc2	1139	4	0.077694	0.075204	1	-2.5578
Fabp2	1140	4	0.07779	0.075323	1	-2.6332
Ctu1	1141	4	0.077934	0.075545	1	-3.8221
Dync1li2	1142	4	0.077982	0.075546	1	-2.6349
Nphs1	1143	4	0.078125	0.075645	1	-2.4109
Ddx20	1144	4	0.078173	0.075646	1	-4.1989
Gm19345	1145	4	0.078221	0.075646	1	-3.1206
Pbx2	1146	4	0.078604	0.076065	1	-2.7861
1600002K03Rik	1147	4	0.0787	0.076183	1	-3.1856
Mtf1	1148	4	0.078748	0.076183	1	-2.9484
Calhm2	1149	4	0.078844	0.076297	1	-2.3128
Siah1b	1150	4	0.078892	0.076297	1	-3.7285
Clec10a	1151	4	0.078987	0.076297	1	-4.2032
Smpd1	1152	4	0.079131	0.076517	1	-2.1221
Pten	1153	4	0.079322	0.076749	1	-2.3925
Crcp	1154	3	0.079352	0.072332	1	-4.4097
Bbox1	1155	4	0.07937	0.076749	1	-4.6854
Ivd	1156	4	0.079777	0.077389	1	-4.681
Gga3	1157	4	0.079849	0.07745	1	-3.4379
Car8	1158	4	0.079992	0.077557	1	-3.3065
Esrra	1159	4	0.080088	0.077661	1	-3.6403
Hs1bp3	1160	4	0.080136	0.077661	1	-4.6771
Ndufb7	1161	4	0.080231	0.07776	1	-2.8319
Zfp935	1162	4	0.080327	0.07776	1	-2.643
Vcp	1163	4	0.08047	0.07786	1	-4.6735
Bmf	1164	4	0.080614	0.077861	1	-2.2448
Nkiras2	1165	4	0.080662	0.077861	1	-4.6687
Aim1	1166	4	0.080709	0.077861	1	-2.6305
BC117090	1167	4	0.080757	0.077861	1	-3.3904
Sltm	1168	4	0.080853	0.077972	1	-4.6651
Zc3h12b	1169	4	0.080948	0.078086	1	-2.7865
Tmem33	1170	4	0.080996	0.078086	1	-3.3262
D16Ertd472e	1171	4	0.081044	0.078086	1	-4.6642
Slc39a2	1172	4	0.081092	0.078086	1	-2.4564
Tmem69	1173	4	0.081307	0.078308	1	-4.6615
Igf1r	1174	4	0.081378	0.078309	1	-3.1919
Zufsp	1175	4	0.081426	0.078309	1	-4.0549
Sez6l2	1176	4	0.081474	0.078309	1	-2.9086
Cdc42bpa	1177	4	0.08157	0.078403	1	-2.4348
Prokr1	1178	4	0.081856	0.078728	1	-4.6533
Mrps14	1179	4	0.081856	0.078728	1	-4.6533
Mllt1	1180	4	0.081999	0.078728	1	-4.6515
Hypk	1181	4	0.081999	0.078728	1	-4.6515
Zkscan6	1182	4	0.082143	0.078853	1	-4.3363
Arrdc2	1183	4	0.08219	0.078853	1	-2.5689
Spag5	1184	4	0.082238	0.078853	1	-4.1132
Fmnl1	1185	4	0.082286	0.078853	1	-4.6493
Ttc9c	1186	4	0.082381	0.078972	1	-2.7273
Mrps7	1187	3	0.082385	0.074899	1	-4.3777
Ap4b1	1188	4	0.082477	0.079073	1	-2.4689
Acta2	1189	4	0.08262	0.079183	1	-3.2302
Itpkb	1190	4	0.082715	0.0793	1	-2.9125
Lage3	1191	4	0.082811	0.079413	1	-4.6438
E230008N13Rik	1192	4	0.082859	0.079414	1	-2.4552
Pold1	1193	2	0.082967	0.073842	1	-3.2102
Msn	1194	4	0.083002	0.079527	1	-3.5811
Kdelr2	1195	4	0.083097	0.079527	1	-2.6169
Trmt1l	1196	4	0.083145	0.079527	1	-3.4763
Snrpd1	1197	4	0.083193	0.079527	1	-4.3251
Pfn2	1198	4	0.08324	0.079527	1	-2.9997
Hist2h2ac	1199	4	0.083288	0.079527	1	-3.3475
Cluap1	1200	4	0.083383	0.07963	1	-3.3495
Setx	1201	4	0.083479	0.079749	1	-4.6337
Mipep	1202	4	0.083741	0.079915	1	-4.6327
Zfp787	1203	4	0.083813	0.079972	1	-3.4412
Lair1	1204	4	0.08386	0.079973	1	-3.5247
Mid2	1205	4	0.083956	0.080084	1	-2.3829
Sla	1206	4	0.084003	0.080084	1	-3.2676
Tox4	1207	4	0.084051	0.080084	1	-4.3191
Rai14	1208	4	0.084242	0.080314	1	-3.4079
Tmsb10	1209	4	0.084337	0.080314	1	-3.6815
Rragc	1210	4	0.084385	0.080314	1	-4.6272
B3glct	1211	4	0.084432	0.080314	1	-3.8104
Hace1	1212	4	0.084528	0.080439	1	-4.6244
Camk2n2	1213	4	0.084575	0.080439	1	-3.1912
Lysmd1	1214	4	0.084623	0.080439	1	-4.268
Dimt1	1215	4	0.084694	0.080439	1	-4.6219
Cope	1216	4	0.084694	0.080439	1	-4.6219
Mtm1	1217	4	0.084813	0.080439	1	-2.8932
Optn	1218	4	0.084861	0.080439	1	-3.093
Zbtb41	1219	4	0.084909	0.080439	1	-3.8689
Zbtb42	1220	4	0.084956	0.080439	1	-2.7329
Itfg3	1221	4	0.085004	0.080439	1	-3.3293
Nupr1	1222	4	0.085052	0.080439	1	-4.6197
P2ry2	1223	4	0.085099	0.080439	1	-3.7589
Rfc2	1224	3	0.085267	0.077253	1	-4.3359
Ifnar1	1225	4	0.085433	0.080905	1	-4.202
Gnpat	1226	4	0.08548	0.080905	1	-4.1241
Zfp738	1227	4	0.085576	0.080905	1	-2.9236
Ndel1	1228	4	0.085623	0.080905	1	-4.6123
Psmb7	1229	4	0.085695	0.080906	1	-4.6119
Ppp1r21	1230	4	0.085766	0.080906	1	-3.9696
Gak	1231	4	0.085861	0.080906	1	-2.9118
Magi2	1232	4	0.085956	0.08101	1	-2.4959
Coq3	1233	4	0.086052	0.081115	1	-2.7047
Ick	1234	4	0.086147	0.081227	1	-3.5828
Tmem234	1235	4	0.086289	0.081449	1	-2.8154
Lef1	1236	4	0.086337	0.081449	1	-4.6047
Ube2o	1237	4	0.086527	0.081547	1	-3.1845
Rbm12b1	1238	3	0.086561	0.078279	1	-2.7606
Commd6	1239	4	0.086575	0.081547	1	-4.6035
Yipf6	1240	4	0.086623	0.081547	1	-4.6019
Dnajc11	1241	1	0.086787	0.079026	0	0
Unc13a	1242	4	0.086908	0.081911	1	-2.9263
Trpv4	1243	4	0.086955	0.081911	1	-3.1477
Jag2	1244	4	0.087003	0.081912	1	-4.2955
2210408I21Rik	1245	4	0.087051	0.081912	1	-3.3275
Athl1	1246	4	0.087098	0.081912	1	-3.44
Erich1	1247	4	0.087241	0.082023	1	-3.4362
Ppp1r12c	1248	4	0.087312	0.082023	1	-4.595
Saa3	1249	4	0.087383	0.082023	1	-2.8582
Polr2c	1250	2	0.087472	0.078482	1	-3.8583
Zfp384	1251	4	0.087526	0.08226	1	-3.5179
Ticam2	1252	4	0.087574	0.08226	1	-2.5187
Osgin1	1253	4	0.087669	0.082372	1	-4.5915
Dclre1a	1254	4	0.087859	0.082486	1	-3.7097
1190002N15Rik	1255	3	0.087891	0.079245	1	-4.3099
Cox7b	1256	4	0.087906	0.082486	1	-4.5902
Supt4a	1257	2	0.088007	0.078889	1	-3.8535
Fermt2	1258	4	0.088049	0.082699	1	-2.5398
Tvp23a	1259	4	0.088096	0.082699	1	-3.6941
3110043O21Rik	1260	4	0.088191	0.082811	1	-3.4986
Tnfsf15	1261	4	0.088239	0.082811	1	-2.2391
Rbl1	1262	4	0.088334	0.082929	1	-3.0819
Nsun3	1263	4	0.088381	0.082929	1	-2.9888
Psmg3	1264	4	0.088619	0.083261	1	-3.7832
Uqcr11	1265	4	0.088761	0.083386	1	-4.5826
Ube2j2	1266	4	0.088809	0.083386	1	-3.7819
Nr1i3	1267	4	0.088856	0.083386	1	-2.5984
Lnpep	1268	4	0.088904	0.083387	1	-3.0028
Slmap	1269	4	0.088951	0.083387	1	-3.6062
Zfp317	1270	3	0.088968	0.080511	1	-4.2951
Actb	1271	3	0.089183	0.080673	1	-4.2905
Zbtb25	1272	4	0.089189	0.083732	1	-3.5439
Myh7b	1273	4	0.089236	0.083733	1	-2.4399
Prune	1274	4	0.089284	0.083733	1	-3.8868
Pabpn1	1275	3	0.089291	0.080768	1	-3.4682
Wbp1	1276	4	0.089379	0.083847	1	-2.4691
Rgs19	1277	4	0.089426	0.083848	1	-2.4479
Dusp28	1278	3	0.089614	0.081036	1	-4.2838
Sike1	1279	4	0.089616	0.084077	1	-4.5733
Tiam2	1280	4	0.089758	0.084177	1	-2.9175
Ugt1a6a	1281	4	0.089806	0.084178	1	-4.1164
Zfp112	1282	4	0.089901	0.084281	1	-2.5559
St14	1283	4	0.090043	0.084393	1	-2.8763
Nsa2	1284	3	0.090116	0.081393	1	-4.2783
Dnase1	1285	4	0.090138	0.084503	1	-4.5671
Crtc2	1286	4	0.09028	0.084732	1	-4.2614
Gapvd1	1287	4	0.090422	0.084732	1	-3.9382
Actr2	1288	3	0.090582	0.081652	1	-4.2736
Hmgb1	1289	3	0.090654	0.081652	1	-2.5092
1110059E24Rik	1290	4	0.090754	0.085077	1	-2.694
Rpp14	1291	4	0.090825	0.085077	1	-4.562
Mpp6	1292	4	0.090825	0.085077	1	-4.562
Kif21b	1293	4	0.090944	0.085196	1	-3.3934
Naa30	1294	4	0.090991	0.085196	1	-4.559
Cnot4	1295	4	0.091039	0.085196	1	-2.9672
Psmb8	1296	4	0.091086	0.085196	1	-3.6478
Ahcy	1297	4	0.091181	0.085318	1	-4.5574
Zfp7	1298	4	0.091228	0.085318	1	-2.6265
Irf2	1299	4	0.091276	0.085318	1	-4.5548
Fzd7	1300	4	0.091418	0.085416	1	-3.7191
Slc35e2	1301	4	0.091465	0.085416	1	-2.6975
Cad	1302	4	0.09156	0.085416	1	-4.5509
Ift22	1303	4	0.091607	0.085417	1	-2.3173
Nelfb	1304	3	0.091657	0.082379	1	-4.256
Gfm1	1305	4	0.091726	0.085417	1	-4.5476
Mboat2	1306	4	0.091797	0.085417	1	-3.2096
Senp2	1307	4	0.091892	0.085529	1	-2.7855
Lrrc32	1308	4	0.091939	0.085529	1	-2.6329
Rsrp1	1309	4	0.092081	0.08553	1	-4.5437
Dhx30	1310	4	0.092128	0.08553	1	-3.8579
Def8	1311	3	0.092158	0.082915	1	-3.2552
Ctns	1312	4	0.092176	0.08553	1	-3.5231
Herpud2	1313	4	0.09227	0.085638	1	-4.5424
Myo9b	1314	4	0.092365	0.085737	1	-2.4875
Nedd4l	1315	4	0.092412	0.085738	1	-3.7214
Hic2	1316	4	0.092554	0.08585	1	-2.5912
Ier5l	1317	4	0.092791	0.086186	1	-2.596
Pdrg1	1318	3	0.092803	0.083377	1	-3.0245
Gm12185	1319	4	0.093028	0.086404	1	-4.5358
Pnpo	1320	4	0.093122	0.086514	1	-2.2786
Trappc2l	1321	4	0.09317	0.086514	1	-2.8079
Gsk3a	1322	4	0.093264	0.086514	1	-2.0867
Ppm1g	1323	4	0.093312	0.086515	1	-2.7579
Mmadhc	1324	4	0.093406	0.086515	1	-2.8019
Zfp799	1325	4	0.093595	0.086732	1	-2.4155
Tnfrsf22	1326	4	0.093737	0.086958	1	-2.8941
Rbck1	1327	4	0.093832	0.087062	1	-3.9125
Gpr65	1328	4	0.093879	0.087062	1	-3.0076
Krcc1	1329	4	0.093927	0.087062	1	-2.587
Dicer1	1330	4	0.094068	0.087178	1	-4.5255
Speg	1331	3	0.094126	0.084612	1	-3.8607
Cmah	1332	4	0.094163	0.087281	1	-2.8281
Hnrnph3	1333	4	0.094257	0.08741	1	-2.7777
Asns	1334	4	0.094352	0.087515	1	-4.5212
Runx1	1335	4	0.094399	0.087515	1	-2.7981
Grap2	1336	4	0.094447	0.087516	1	-3.3467
Zfp605	1337	4	0.094494	0.087516	1	-2.8051
Prdx6	1338	4	0.094588	0.087641	1	-2.2704
Tbc1d9	1339	4	0.094636	0.087642	1	-3.8401
Qpctl	1340	4	0.09473	0.087755	1	-4.0767
Sfi1	1341	4	0.094919	0.087881	1	-3.9572
Myoz1	1342	4	0.09525	0.088207	1	-2.8126
Pola2	1343	4	0.095297	0.088207	1	-4.5082
Gm16501	1344	4	0.095392	0.088322	1	-2.978
Nutf2	1345	3	0.095627	0.086384	1	-4.2109
Zfp12	1346	4	0.095628	0.088552	1	-2.1301
Nedd1	1347	4	0.095675	0.088553	1	-3.3998
Ip6k1	1348	4	0.095864	0.088657	1	-4.0584
Zfp870	1349	4	0.095911	0.088657	1	-2.6253
Reep1	1350	4	0.096053	0.08889	1	-4.4984
Nfkbia	1351	4	0.096194	0.089011	1	-3.5176
Slc16a11	1352	4	0.096241	0.089011	1	-3.3026
Rab3il1	1353	4	0.096289	0.089012	1	-3.6809
1110012L19Rik	1354	4	0.096336	0.089012	1	-3.1824
Cyp2u1	1355	4	0.096383	0.089012	1	-2.5201
Mrps18c	1356	4	0.096477	0.089114	1	-4.2
Nvl	1357	4	0.096572	0.089221	1	-4.4936
Mafg	1358	4	0.09676	0.089571	1	-4.4892
Ampd2	1359	4	0.096855	0.089684	1	-3.8334
Cass4	1360	4	0.096902	0.089684	1	-2.7229
Katnb1	1361	4	0.096996	0.089684	1	-3.5193
Ero1l	1362	4	0.097043	0.089684	1	-2.5911
Gpkow	1363	4	0.097091	0.089685	1	-3.2119
Dguok	1364	4	0.097138	0.089685	1	-3.8201
Tmem35	1365	4	0.097185	0.089685	1	-4.1122
2310022A10Rik	1366	3	0.097197	0.087347	1	-4.1913
Rps19bp1	1367	4	0.097232	0.089685	1	-3.9964
Nsf	1368	3	0.097269	0.087348	1	-3.7245
2410015M20Rik	1369	4	0.097279	0.089685	1	-4.4844
Gm14351	1370	1	0.097308	0.089743	0	0
Gramd1a	1371	4	0.097609	0.090241	1	-3.4879
Sccpdh	1372	4	0.097703	0.090349	1	-2.3381
AU040320	1373	4	0.097892	0.09059	1	-2.5097
Pex16	1374	4	0.098222	0.090949	1	-4.4762
Uchl3	1375	4	0.098316	0.091054	1	-3.9212
Usp19	1376	4	0.098363	0.091054	1	-3.9881
Vwa1	1377	4	0.09841	0.091055	1	-2.975
Pxn	1378	4	0.098481	0.091055	1	-4.4741
Dennd5a	1379	4	0.098481	0.091055	1	-4.4741
Rps14	1380	2	0.098757	0.088813	1	-3.7078
Zfp942	1381	4	0.098787	0.091511	1	-3.5122
Arfip1	1382	4	0.098834	0.091511	1	-2.4644
Rnf8	1383	4	0.098928	0.091631	1	-3.3028
Bcl7c	1384	4	0.099023	0.091742	1	-3.2617
Myo10	1385	4	0.099258	0.091953	1	-2.9377
Chadl	1386	4	0.099305	0.091953	1	-4.4659
Plgrkt	1387	4	0.099588	0.092429	1	-3.1328
Gtf2f1	1388	4	0.099682	0.092429	1	-3.9698
Map3k1	1389	4	0.099776	0.092538	1	-2.772
Cnnm3	1390	4	0.09987	0.092645	1	-3.3994
Atp6v1h	1391	4	0.099964	0.092646	1	-3.4591
Zcchc7	1392	4	0.10001	0.092646	1	-3.4391
Eri2	1393	4	0.10029	0.093106	1	-3.3728
Akap12	1394	4	0.10039	0.093213	1	-3.7026
Clock	1395	4	0.10048	0.093213	1	-4.4572
4921507P07Rik	1396	4	0.10048	0.093213	1	-4.4572
Polr3gl	1397	4	0.10058	0.093213	1	-2.6799
Slu7	1398	3	0.10062	0.090406	1	-4.1458
Phactr2	1399	4	0.10065	0.093213	1	-4.4561
Acp1	1400	4	0.10072	0.093213	1	-4.4558
Armt1	1401	4	0.10081	0.09333	1	-2.247
Gcgr	1402	4	0.10105	0.093669	1	-3.0308
Cars	1403	3	0.10119	0.091061	1	-3.4582
Stk10	1404	4	0.10142	0.094353	1	-3.7566
Dusp16	1405	4	0.10147	0.094353	1	-3.8042
Lsm6	1406	4	0.10156	0.094458	1	-4.4439
Sphk2	1407	4	0.10161	0.094458	1	-2.7709
Ppp1r10	1408	4	0.10166	0.094458	1	-4.1314
Ilf3	1409	4	0.1017	0.094459	1	-4.4432
Dynlt1b	1410	4	0.1018	0.094459	1	-2.3075
Agfg2	1411	4	0.10189	0.094567	1	-3.0609
Mitf	1412	4	0.10196	0.094567	1	-4.4414
Gnpda2	1413	4	0.10196	0.094567	1	-4.4414
Supt6	1414	3	0.102	0.091691	1	-4.128
Irs2	1415	4	0.10208	0.094568	1	-4.4407
Fam219a	1416	4	0.10217	0.094687	1	-3.7395
Ap1s2	1417	4	0.10234	0.094911	1	-4.4361
Fh1	1418	4	0.10234	0.094911	1	-4.4361
Esco2	1419	4	0.10255	0.095271	1	-4.4336
Polr3a	1420	2	0.10258	0.093217	1	-3.5093
C330007P06Rik	1421	4	0.1026	0.095271	1	-2.6768
Srgap3	1422	4	0.10264	0.095271	1	-4.4329
Cdt1	1423	4	0.10274	0.095373	1	-4.142
Psme1	1424	4	0.10288	0.095484	1	-2.858
Gm694	1425	3	0.10293	0.091969	1	-2.3817
Prkci	1426	4	0.10302	0.095606	1	-4.4273
Creb1	1427	3	0.10311	0.092064	1	-3.6276
Rnf157	1428	4	0.10316	0.095722	1	-3.1367
Adck5	1429	4	0.10321	0.095722	1	-2.5264
2310011J03Rik	1430	3	0.10327	0.09211	1	-4.1165
Camta2	1431	4	0.10335	0.095831	1	-3.3473
Ccdc79	1432	4	0.10339	0.095831	1	-2.0465
Sac3d1	1433	4	0.10344	0.095831	1	-2.285
Clptm1	1434	4	0.10349	0.095831	1	-4.4223
Exoc2	1435	4	0.10353	0.095831	1	-3.7884
Mvp	1436	3	0.10357	0.092436	1	-2.4952
Ttpa	1437	4	0.10363	0.09594	1	-2.2908
Mrps11	1438	4	0.10372	0.096043	1	-3.8271
Med27	1439	4	0.10382	0.096043	1	-4.4173
Ocrl	1440	4	0.10391	0.09615	1	-2.7143
Mpeg1	1441	4	0.104	0.096265	1	-2.5331
Tbc1d17	1442	4	0.10405	0.096265	1	-2.1204
Rnmt	1443	4	0.10428	0.096603	1	-4.4108
Cdk2ap1	1444	4	0.10433	0.096603	1	-2.8367
Gipc1	1445	4	0.10447	0.096604	1	-2.1498
Ipo11	1446	4	0.10452	0.096604	1	-3.8318
Slc39a9	1447	4	0.10466	0.096729	1	-3.3617
Col4a3	1448	4	0.10471	0.096729	1	-3.997
Wdr91	1449	4	0.1048	0.096838	1	-4.0524
Bckdha	1450	4	0.10489	0.096838	1	-3.8842
Soat1	1451	4	0.10494	0.096838	1	-2.4954
Nphp3	1452	4	0.10499	0.096838	1	-4.0516
Slc45a3	1453	4	0.10508	0.096968	1	-3.0205
Slc25a40	1454	4	0.10513	0.096968	1	-2.5538
Laptm4a	1455	4	0.10527	0.097082	1	-2.8614
Ptges	1456	4	0.10532	0.097083	1	-3.0559
Cited2	1457	4	0.10536	0.097083	1	-4.1134
Cpb2	1458	4	0.10569	0.097758	1	-2.5063
Btbd2	1459	4	0.10574	0.097758	1	-3.8238
Pcdhb22	1460	4	0.10578	0.097758	1	-3.0747
Vps13d	1461	4	0.10588	0.097869	1	-4.396
Prr11	1462	3	0.10594	0.09453	1	-2.9924
Snf8	1463	4	0.10606	0.098227	1	-4.3949
Hibadh	1464	4	0.10611	0.098227	1	-3.7097
Urb2	1465	4	0.10621	0.09835	1	-4.3931
Otud6b	1466	4	0.10625	0.09835	1	-2.8736
2810007J24Rik	1467	4	0.1063	0.09835	1	-3.3351
Isoc2a	1468	4	0.10635	0.09835	1	-2.4884
Gm4175	1469	3	0.1064	0.094815	1	-4.0785
Ccdc174	1470	4	0.10642	0.09835	1	-4.3912
Safb	1471	4	0.10642	0.09835	1	-4.3912
BC028528	1472	4	0.10649	0.09835	1	-2.9687
Gc	1473	4	0.10653	0.09835	1	-2.3921
Cdk20	1474	4	0.10663	0.098473	1	-2.5759
Gm5549	1475	4	0.10672	0.098582	1	-3.5425
Pigm	1476	4	0.10681	0.098701	1	-3.7657
Slc25a44	1477	4	0.10721	0.099295	1	-4.3847
Ppig	1478	4	0.10721	0.099295	1	-4.3847
Tceanc2	1479	4	0.10733	0.099409	1	-3.0577
C1d	1480	4	0.10737	0.099409	1	-4.3839
Klf11	1481	4	0.10747	0.09941	1	-2.9534
Eif3m	1482	4	0.10756	0.099529	1	-4.3828
Wdr1	1483	4	0.10766	0.099646	1	-2.6308
Samd9l	1484	4	0.1077	0.099646	1	-4.3821
Atg2b	1485	4	0.10784	0.099762	1	-2.3959
Spink3	1486	4	0.10789	0.099762	1	-1.7404
Mup1	1487	4	0.10794	0.099762	1	-4.381
Wdr82	1488	4	0.10803	0.099763	1	-4.3803
AI413582	1489	4	0.10808	0.099763	1	-3.413
Paqr8	1490	4	0.10812	0.099763	1	-4.3792
Irgc1	1491	4	0.10822	0.099879	1	-2.1245
Cdv3	1492	4	0.1084	0.099994	1	-4.3773
Csrp1	1493	4	0.1085	0.10011	1	-2.6653
Fbxo46	1494	4	0.10864	0.10024	1	-3.2613
Arhgap22	1495	4	0.10882	0.10045	1	-2.8762
Ncf1	1496	4	0.10887	0.10045	1	-2.5972
Ube2e1	1497	4	0.10892	0.10045	1	-2.3346
Ipcef1	1498	4	0.10906	0.10056	1	-2.463
Cenpb	1499	4	0.1091	0.10056	1	-2.756
Xlr	1500	4	0.10915	0.10056	1	-3.6554
Adipor2	1501	4	0.10934	0.10092	1	-2.9216
Vmn2r73	1502	4	0.10938	0.10092	1	-2.2004
Pabpc1l	1503	4	0.10948	0.10092	1	-4.3651
Pdik1l	1504	4	0.10952	0.10092	1	-3.4048
Abcf2	1505	4	0.10957	0.10092	1	-3.4175
Mapre2	1506	4	0.10962	0.10092	1	-2.7208
Tmem260	1507	4	0.10971	0.10103	1	-3.0121
Irgm1	1508	4	0.10976	0.10103	1	-3.0085
Chp1	1509	4	0.1099	0.10115	1	-3.5266
Rps27	1510	3	0.10991	0.097739	1	-3.2113
Vps4b	1511	4	0.10994	0.10115	1	-4.3599
Ccdc17	1512	4	0.10999	0.10115	1	-2.8055
Uox	1513	4	0.11004	0.10115	1	-3.8801
Hip1	1514	4	0.11022	0.10137	1	-2.1958
Enah	1515	4	0.11036	0.10149	1	-3.448
Fanca	1516	4	0.11041	0.10149	1	-3.9033
4931423N10Rik	1517	4	0.1105	0.10162	1	-3.2987
Rpl13	1518	2	0.11062	0.1009	1	-3.4282
0610011F06Rik	1519	4	0.11064	0.10183	1	-2.7191
Hist1h2bl	1520	4	0.11074	0.10183	1	-3.1409
Rufy1	1521	4	0.11078	0.10183	1	-4.3502
Tefm	1522	4	0.11092	0.10208	1	-4.3483
Ppargc1a	1523	4	0.11097	0.10208	1	-3.0956
Dcaf11	1524	4	0.11102	0.10208	1	-4.3472
Cdc40	1525	4	0.11111	0.1022	1	-3.2384
Dcaf8	1526	4	0.11139	0.10255	1	-4.3453
Wdr35	1527	4	0.11144	0.10255	1	-3.0408
Slc12a7	1528	4	0.11148	0.10255	1	-3.0104
Nupl2	1529	3	0.11151	0.099269	1	-4.0189
Tomm40	1530	4	0.11155	0.10255	1	-4.3438
Atad5	1531	4	0.11155	0.10255	1	-4.3438
Polr2h	1532	2	0.1116	0.10179	1	-3.5442
Cox7c	1533	4	0.11181	0.10289	1	-4.34
Tmx2	1534	4	0.1119	0.103	1	-4.3393
Nfya	1535	4	0.11195	0.103	1	-4.3381
Map4k4	1536	4	0.11213	0.10311	1	-3.1303
Gnai3	1537	4	0.11223	0.10322	1	-4.0454
Epas1	1538	4	0.11227	0.10322	1	-3.3656
Lemd3	1539	4	0.11232	0.10322	1	-2.789
Rbp4	1540	4	0.11237	0.10322	1	-1.8717
Homer1	1541	4	0.11244	0.10329	1	-4.3325
Gprc5b	1542	4	0.11251	0.10335	1	-3.2141
Mpp3	1543	4	0.11255	0.10335	1	-1.8397
Dcaf12	1544	4	0.1126	0.10335	1	-4.3321
Zfp407	1545	4	0.11269	0.10346	1	-4.0398
Prx	1546	4	0.11274	0.10346	1	-2.4017
Mars	1547	4	0.11279	0.10346	1	-4.3286
Cdk12	1548	4	0.11293	0.10368	1	-3.5067
Abcf1	1549	4	0.11297	0.10368	1	-4.3271
Sirt6	1550	4	0.11302	0.10368	1	-3.9862
Capn7	1551	4	0.11307	0.10368	1	-3.8747
Thoc3	1552	4	0.11353	0.10414	1	-2.9373
Pja1	1553	4	0.11367	0.10425	1	-3.6741
Zbtb21	1554	4	0.11386	0.10437	1	-3.9863
2020-09-04	1555	4	0.1139	0.10437	1	-3.17
Ftsj3	1556	3	0.11391	0.1021	1	-3.9966
Sufu	1557	4	0.114	0.10449	1	-2.4262
Gpbp1	1558	4	0.11423	0.10484	1	-4.3176
Spin1	1559	4	0.11427	0.10484	1	-1.8159
Spred1	1560	4	0.11432	0.10484	1	-3.8224
Gtf2h5	1561	4	0.11437	0.10484	1	-2.0823
Atic	1562	3	0.11437	0.10246	1	-3.9932
Aldoa	1563	3	0.11437	0.10246	1	-3.9932
Agap1	1564	4	0.11446	0.10496	1	-2.3978
Syne1	1565	4	0.11451	0.10496	1	-2.4983
Rfng	1566	4	0.11465	0.10509	1	-4.3141
Oscp1	1567	4	0.11479	0.10531	1	-4.0401
D8Ertd82e	1568	4	0.11488	0.10531	1	-4.3122
Tgfbr3l	1569	4	0.11493	0.10531	1	-2.452
Adamts14	1570	4	0.11502	0.10542	1	-2.5702
Rnf130	1571	4	0.11506	0.10542	1	-3.5366
Lgmn	1572	4	0.11511	0.10542	1	-3.0227
Slco1a1	1573	4	0.11527	0.10553	1	-4.3106
Xrcc2	1574	4	0.11544	0.10553	1	-4.3099
Rpf2	1575	4	0.11544	0.10553	1	-4.3099
Chchd6	1576	4	0.11544	0.10553	1	-4.3099
Mcmdc2	1577	4	0.11544	0.10553	1	-4.3099
Phax	1578	4	0.11562	0.10564	1	-4.3091
Wdr26	1579	4	0.11581	0.10575	1	-2.7224
Zc2hc1a	1580	4	0.11604	0.10608	1	-2.669
Ndufv3	1581	4	0.11613	0.1062	1	-2.1263
Tax1bp3	1582	4	0.11637	0.10654	1	-3.8575
Cers5	1583	4	0.11641	0.10654	1	-2.4293
Zfp329	1584	3	0.11643	0.10397	1	-2.4902
Phlda1	1585	4	0.11664	0.1069	1	-3.1346
Znrf2	1586	4	0.11669	0.1069	1	-4.0433
Ppp4c	1587	4	0.11692	0.10724	1	-2.9978
1700019B03Rik	1588	4	0.11701	0.10734	1	-3.4331
Dnm1	1589	4	0.11706	0.10734	1	-2.768
Bloc1s6	1590	4	0.1172	0.10745	1	-3.2462
Smarca4	1591	4	0.11734	0.10757	1	-4.2861
Cul1	1592	3	0.11736	0.10504	1	-3.9631
1700006E09Rik	1593	4	0.11739	0.10757	1	-3.6876
Utp11l	1594	4	0.11757	0.10781	1	-4.2842
Sptlc2	1595	4	0.11757	0.10781	1	-4.2842
Cep104	1596	4	0.11771	0.10781	1	-2.5361
Ccdc15	1597	4	0.11776	0.10781	1	-2.5097
Pdcd2l	1598	4	0.1178	0.10781	1	-3.603
Dand5	1599	4	0.11785	0.10781	1	-2.9364
Nxf1	1600	3	0.11789	0.1056	1	-3.9606
Arl2	1601	4	0.1179	0.10781	1	-4.2806
Wbscr27	1602	4	0.11799	0.10792	1	-2.4145
Timm13	1603	4	0.11803	0.10792	1	-3.1323
Nudt5	1604	4	0.11817	0.10803	1	-1.6279
Mrpl37	1605	4	0.11836	0.10827	1	-3.9021
Tgtp2	1606	4	0.11841	0.10827	1	-1.8711
Rab11b	1607	4	0.11845	0.10827	1	-4.2763
Gid4	1608	4	0.11854	0.1084	1	-3.1049
Suds3	1609	4	0.11859	0.1084	1	-3.6921
Nhsl2	1610	4	0.11864	0.1084	1	-2.2971
Ogdhl	1611	4	0.11873	0.1084	1	-3.027
Coa6	1612	4	0.11891	0.10862	1	-4.2736
Grik5	1613	4	0.1191	0.10874	1	-4.2716
Lyn	1614	4	0.11924	0.10886	1	-3.2034
Pa2g4	1615	4	0.11928	0.10886	1	-4.2676
Pcx	1616	4	0.11942	0.10906	1	-3.5496
6330416G13Rik	1617	4	0.11952	0.10906	1	-3.4938
Ldb1	1618	4	0.11956	0.10906	1	-4.2632
Haghl	1619	4	0.11961	0.10906	1	-2.383
4930432K21Rik	1620	4	0.1197	0.10917	1	-3.2776
Fignl1	1621	4	0.11975	0.10917	1	-4.2612
Flnb	1622	4	0.11979	0.10917	1	-2.6798
Dnajc25	1623	4	0.11984	0.10917	1	-3.5049
Snx32	1624	4	0.11998	0.10927	1	-4.258
Terf2ip	1625	4	0.12007	0.10927	1	-4.2572
Prkd3	1626	4	0.12007	0.10927	1	-4.2572
Zfp316	1627	4	0.12016	0.10927	1	-2.449
Mis18bp1	1628	4	0.12035	0.10951	1	-3.6794
Gcfc2	1629	4	0.1204	0.10951	1	-4.2556
Nfx1	1630	4	0.12063	0.10985	1	-2.9129
Fbxl21	1631	4	0.12067	0.10985	1	-3.8845
Casp9	1632	4	0.12072	0.10985	1	-2.3256
Maoa	1633	4	0.1209	0.11016	1	-2.2274
Atpaf2	1634	4	0.121	0.11016	1	-3.24
Tnfrsf17	1635	4	0.12109	0.11016	1	-2.7345
Selk	1636	4	0.12118	0.11016	1	-4.2484
Dgkg	1637	4	0.12118	0.11016	1	-4.2484
Cage1	1638	4	0.12146	0.11049	1	-3.0589
Ppm1e	1639	4	0.12155	0.11061	1	-3.0553
Clcn5	1640	4	0.1216	0.11061	1	-2.7083
Rangap1	1641	3	0.12162	0.10911	1	-3.5892
Olfr56	1642	4	0.12169	0.11073	1	-3.8242
Lrrc27	1643	4	0.12174	0.11073	1	-2.4718
Arfgap3	1644	4	0.12187	0.11084	1	-2.8857
Ppp6r1	1645	4	0.12201	0.11095	1	-3.8129
Galnt6	1646	4	0.12211	0.11106	1	-2.9149
Plek	1647	4	0.12215	0.11106	1	-2.4659
Tmem39b	1648	4	0.1222	0.11106	1	-3.3644
Narfl	1649	4	0.12234	0.11118	1	-3.3077
Ggta1	1650	4	0.12238	0.11118	1	-1.9805
Rpf1	1651	4	0.12245	0.11118	1	-4.2371
Map2k4	1652	4	0.12252	0.11118	1	-3.4841
Mtdh	1653	4	0.12257	0.11118	1	-2.315
Osbpl5	1654	4	0.12261	0.11118	1	-1.9525
Stam2	1655	4	0.12271	0.11127	1	-2.1351
Ruvbl2	1656	3	0.12281	0.11069	1	-2.7935
Mlf2	1657	4	0.12294	0.11164	1	-2.9185
Eefsec	1658	4	0.12298	0.11164	1	-3.4891
Arhgap10	1659	4	0.12312	0.11186	1	-3.2988
Rnaset2b	1660	4	0.12317	0.11186	1	-3.9655
Mterf1b	1661	4	0.12326	0.11198	1	-2.5741
Grwd1	1662	3	0.12327	0.11088	1	-3.9035
Wdr24	1663	4	0.12361	0.11233	1	-4.2301
Vmp1	1664	4	0.12361	0.11233	1	-4.2301
Pabpc1	1665	4	0.12361	0.11233	1	-4.2301
Psmd11	1666	4	0.12361	0.11233	1	-4.2301
Myom1	1667	4	0.12372	0.11233	1	-2.3907
Agbl5	1668	4	0.12395	0.11278	1	-2.3875
Cyb5r1	1669	4	0.12409	0.1129	1	-1.8935
Map1lc3b	1670	4	0.12418	0.11302	1	-2.0223
Trappc4	1671	4	0.12423	0.11302	1	-4.2232
Adam9	1672	4	0.12427	0.11302	1	-3.3584
Dusp1	1673	4	0.12432	0.11302	1	-3.7989
Rcc2	1674	4	0.1245	0.11336	1	-3.3972
Dnal4	1675	4	0.12455	0.11337	1	-1.742
Triobp	1676	4	0.12469	0.1135	1	-2.385
Chek1	1677	4	0.12515	0.1143	1	-3.0957
Dus3l	1678	4	0.1252	0.1143	1	-3.1213
Abcb1b	1679	4	0.12529	0.11442	1	-3.6885
Scd2	1680	2	0.12533	0.11427	0	0
Psmc4	1681	3	0.12564	0.11296	1	-3.5676
Cnbd2	1682	4	0.1257	0.11498	1	-3.6874
Lrrcc1	1683	4	0.12575	0.11498	1	-3.0827
Cd59a	1684	4	0.12579	0.11498	1	-3.6485
Rgs18	1685	4	0.12584	0.11498	1	-2.5025
Rom1	1686	4	0.12593	0.11498	1	-2.4392
Hscb	1687	4	0.126	0.11498	1	-4.2067
Rgs10	1688	4	0.126	0.11498	1	-4.2067
Rab33b	1689	4	0.12607	0.11498	1	-2.1922
Lamc1	1690	4	0.12616	0.11498	1	-2.7435
Dlgap5	1691	4	0.12621	0.11498	1	-3.5538
Socs2	1692	4	0.12632	0.11498	1	-4.2026
Sec62	1693	4	0.12632	0.11498	1	-4.2026
Ercc2	1694	4	0.12639	0.11498	1	-3.5847
Mical1	1695	4	0.12644	0.11498	1	-3.4159
Hspb6	1696	4	0.12653	0.11498	1	-2.4931
Trnau1ap	1697	4	0.12658	0.11498	1	-2.9102
Gm595	1698	4	0.12662	0.11498	1	-3.0249
Fndc3b	1699	4	0.12676	0.11522	1	-3.3094
Itgb7	1700	4	0.12685	0.11522	1	-3.1129
Sprtn	1701	2	0.12686	0.1155	0	0
D10Wsu102e	1702	4	0.12699	0.11545	1	-4.1951
Acaa2	1703	4	0.12708	0.11557	1	-2.5132
Gtf2i	1704	4	0.12713	0.11557	1	-2.4595
Tob2	1705	4	0.12727	0.11569	1	-3.2114
Rabggta	1706	4	0.1274	0.11592	1	-3.246
Abhd8	1707	4	0.12768	0.11603	1	-2.3577
Srebf1	1708	4	0.12773	0.11603	1	-2.6925
Hagh	1709	4	0.12782	0.11614	1	-2.3928
Gng10	1710	4	0.12786	0.11615	1	-2.1307
Oas3	1711	4	0.12791	0.11615	1	-2.8457
Rps15	1712	1	0.12802	0.12032	0	0
Tbck	1713	4	0.12805	0.11637	1	-2.12
Amdhd1	1714	4	0.12809	0.11637	1	-2.8878
Kifc5b	1715	4	0.12818	0.11637	1	-3.2011
Fam192a	1716	4	0.12823	0.11637	1	-2.9361
1700037H04Rik	1717	4	0.12832	0.11637	1	-2.4488
Gm13285	1718	3	0.12857	0.11593	1	-3.1478
Stk16	1719	4	0.1286	0.11679	1	-3.5815
Snx5	1720	4	0.12864	0.11679	1	-2.6324
Syne2	1721	4	0.12878	0.1169	1	-2.5016
Gtf3c5	1722	2	0.12905	0.11738	0	0
C1qbp	1723	4	0.12906	0.11707	1	-4.1745
Sec22a	1724	4	0.12929	0.11748	1	-2.9502
Cops3	1725	4	0.12945	0.11769	1	-4.1706
Hist2h2ab	1726	4	0.12961	0.11792	1	-3.6906
Proc	1727	4	0.1297	0.11792	1	-3.9383
Cideb	1728	4	0.12975	0.11792	1	-3.6214
Mrps5	1729	4	0.12986	0.11803	1	-4.1673
Mrpl40	1730	4	0.12986	0.11803	1	-4.1673
Dynlrb1	1731	4	0.12993	0.11803	1	-4.1668
Fnbp1l	1732	4	0.12998	0.11803	1	-2.6848
Myd88	1733	4	0.13002	0.11803	1	-3.0126
Oxa1l	1734	4	0.13018	0.11826	1	-4.1613
Fkbp3	1735	4	0.13039	0.11848	1	-4.1591
Sec31b	1736	4	0.13043	0.11848	1	-1.8314
Olfr889	1737	4	0.13048	0.11848	1	-2.3088
Dse	1738	4	0.13053	0.11848	1	-2.4645
Lima1	1739	4	0.13066	0.11859	1	-3.7106
Birc2	1740	4	0.13071	0.11859	1	-2.3635
Pax3	1741	4	0.13089	0.11881	1	-2.9332
Klf12	1742	4	0.13094	0.11881	1	-2.2847
Fam212b	1743	4	0.13108	0.11892	1	-2.7774
Galnt1	1744	4	0.13112	0.11892	1	-1.9296
Fahd2a	1745	4	0.13117	0.11892	1	-2.7539
Spns1	1746	4	0.13135	0.11916	1	-2.7767
Cyhr1	1747	4	0.13167	0.11963	1	-2.5842
Chchd5	1748	4	0.13185	0.11969	1	-4.1458
Tmem86b	1749	4	0.13195	0.11974	1	-3.0758
Bub1	1750	4	0.13208	0.11996	1	-4.1445
Uggt2	1751	4	0.13213	0.11996	1	-2.0566
Hist1h4f	1752	4	0.13222	0.1201	1	-2.7339
2010012O05Rik	1753	3	0.1323	0.11933	1	-3.8231
Rxrb	1754	4	0.13236	0.12031	1	-2.8582
Lck	1755	4	0.1324	0.12032	1	-2.3441
Pex2	1756	4	0.1325	0.12043	1	-3.7017
Slc9a6	1757	4	0.13263	0.12055	1	-2.8696
Mks1	1758	4	0.13268	0.12055	1	-1.9189
Tfeb	1759	4	0.13277	0.12067	1	-3.0955
Vamp8	1760	4	0.13286	0.12078	1	-2.2332
Pigz	1761	4	0.13295	0.12088	1	-3.7918
Inpp5b	1762	4	0.13309	0.12101	1	-2.0734
Sepn1	1763	4	0.13332	0.12123	1	-2.9908
Larp1	1764	4	0.13336	0.12123	1	-2.77
Fam122b	1765	4	0.13346	0.12135	1	-2.3095
Arhgef15	1766	4	0.1335	0.12135	1	-3.4608
Tmem55b	1767	4	0.13355	0.12135	1	-1.7477
Dusp7	1768	4	0.13359	0.12135	1	-2.4274
4930578C19Rik	1769	4	0.13368	0.12135	1	-2.2816
Plch1	1770	4	0.13378	0.12135	1	-2.8939
Fzd5	1771	4	0.13382	0.12135	1	-2.4539
Asun	1772	4	0.13387	0.12135	1	-3.0859
Il4ra	1773	4	0.13396	0.12135	1	-2.0463
Cnot1	1774	3	0.13396	0.12027	1	-3.8106
Asna1	1775	3	0.13396	0.12027	1	-3.8106
Nploc4	1776	4	0.134	0.12135	1	-4.1258
Mrpl17	1777	4	0.13405	0.12135	1	-2.375
Cyb5d2	1778	4	0.1341	0.12135	1	-2.289
Akr1d1	1779	4	0.13414	0.12135	1	-1.8589
Hhex	1780	4	0.13419	0.12135	1	-2.1062
Napa	1781	3	0.13421	0.12054	1	-3.8073
Aars2	1782	4	0.13423	0.12135	1	-4.1231
Cdc37l1	1783	4	0.13428	0.12135	1	-2.8967
Mcm8	1784	3	0.13434	0.12062	1	-2.1961
Eapp	1785	4	0.13435	0.12135	1	-4.1218
Gm7157	1786	4	0.13446	0.12146	1	-4.1214
Zc3h15	1787	4	0.13455	0.12157	1	-2.6393
1700011H14Rik	1788	4	0.13464	0.12157	1	-2.8599
Icam4	1789	4	0.13474	0.1217	1	-3.7795
Itgax	1790	4	0.13487	0.1217	1	-3.0299
Slc35a1	1791	3	0.135	0.12134	1	-3.3235
Rp9	1792	4	0.13506	0.12181	1	-4.117
Cd69	1793	4	0.13515	0.12181	1	-1.8768
Taf11	1794	4	0.13526	0.12186	1	-4.1165
Gabpb1	1795	4	0.13526	0.12186	1	-4.1165
Rrp1b	1796	4	0.13537	0.12192	1	-2.996
1810037I17Rik	1797	4	0.13547	0.12203	1	-3.1957
Ica1	1798	4	0.13551	0.12203	1	-2.3624
Sfmbt1	1799	4	0.13569	0.12225	1	-2.9075
Gm11711	1800	4	0.13574	0.12225	1	-2.598
Ercc1	1801	4	0.13579	0.12225	1	-4.113
Zfp97	1802	4	0.13588	0.12237	1	-3.0272
Fyb	1803	4	0.1362	0.12283	1	-2.9385
Tmem132a	1804	4	0.13629	0.12283	1	-2.3436
Zc3h3	1805	4	0.13636	0.12283	1	-4.109
Fxn	1806	4	0.13636	0.12283	1	-4.109
Atp1a1	1807	4	0.13647	0.12295	1	-4.1086
Nipa2	1808	4	0.13652	0.12295	1	-2.1186
Tiparp	1809	4	0.13661	0.12295	1	-3.3594
Nudt16	1810	4	0.13665	0.12295	1	-3.7782
Synj2bp	1811	4	0.1367	0.12295	1	-2.5137
Eef1b2	1812	3	0.13672	0.12297	1	-3.7858
Rbm39	1813	4	0.13674	0.12295	1	-2.9095
Nrp2	1814	4	0.13679	0.12295	1	-2.5665
Lix1	1815	4	0.13683	0.12295	1	-3.2866
Atp5a1	1816	3	0.13691	0.12325	1	-3.7842
Rps6kc1	1817	4	0.13697	0.12317	1	-1.7635
Srrd	1818	4	0.13711	0.1234	1	-3.5224
Fam160a1	1819	4	0.1372	0.1234	1	-3.2317
Olfr912	1820	4	0.13734	0.12353	1	-2.8136
Dhx16	1821	4	0.13738	0.12353	1	-4.0997
Dhx57	1822	4	0.13743	0.12353	1	-3.4006
Cdc25b	1823	4	0.1375	0.12358	1	-4.0983
Supt20	1824	4	0.13766	0.12374	1	-3.4435
Gcat	1825	4	0.13793	0.12408	1	-3.5704
Cog4	1826	3	0.13805	0.12431	1	-3.773
Cxx1b	1827	4	0.13807	0.12418	1	-3.6635
Ndufb5	1828	4	0.13811	0.12418	1	-3.2769
Snap23	1829	4	0.13816	0.12418	1	-4.0898
Pnpt1	1830	4	0.13841	0.12453	1	-4.0867
Zc3h11a	1831	4	0.13841	0.12453	1	-4.0867
Eif2ak4	1832	3	0.13843	0.12484	1	-3.1571
Dnpep	1833	4	0.13861	0.12488	1	-2.8719
Rin2	1834	4	0.13875	0.12488	1	-2.8516
Ppil1	1835	4	0.13893	0.12511	1	-4.0813
Tsfm	1836	4	0.13893	0.12511	1	-4.0813
Mzt1	1837	3	0.13895	0.12563	1	-2.6427
Ss18	1838	4	0.13907	0.12522	1	-2.9066
Sgsm1	1839	4	0.13916	0.12522	1	-2.5047
Fhod3	1840	4	0.1392	0.12522	1	-2.4182
Rpl5	1841	3	0.13928	0.12581	1	-3.7601
Uba2	1842	3	0.13928	0.12581	1	-3.7601
Hnrnpa1	1843	4	0.13929	0.12522	1	-4.0785
Cir1	1844	4	0.13929	0.12522	1	-4.0785
Tbc1d5	1845	4	0.13941	0.12522	1	-4.0781
Epg5	1846	4	0.13941	0.12522	1	-4.0781
Arhgdia	1847	4	0.13948	0.12522	1	-3.2697
Zfp850	1848	3	0.1395	0.12581	1	-2.9149
Lca5l	1849	4	0.13957	0.12534	1	-2.9751
Ddx26b	1850	4	0.13961	0.12534	1	-3.598
Tmem151a	1851	4	0.13966	0.12534	1	-2.8604
Mrpl54	1852	4	0.1397	0.12534	1	-3.431
Ddias	1853	4	0.13975	0.12534	1	-3.5148
Chd3	1854	4	0.13993	0.12566	1	-3.8232
Yeats2	1855	4	0.13998	0.12566	1	-2.8966
Zc3h7a	1856	4	0.14007	0.12577	1	-2.5801
Themis2	1857	4	0.14016	0.12589	1	-2.8003
Nde1	1858	4	0.1402	0.12589	1	-2.6901
Asxl1	1859	4	0.14025	0.12589	1	-3.8564
Ascc2	1860	4	0.14029	0.12589	1	-4.0695
Setd5	1861	4	0.14039	0.126	1	-2.8955
Gng5	1862	4	0.14048	0.12611	1	-3.4248
Sgip1	1863	4	0.14057	0.12621	1	-3.7892
Zfp69	1864	4	0.14079	0.12657	1	-2.7332
Unc13d	1865	4	0.14084	0.12657	1	-2.6247
Elf1	1866	4	0.14089	0.12657	1	-1.9053
Cdkn1c	1867	4	0.14098	0.12657	1	-3.2642
Arhgef12	1868	4	0.14102	0.12657	1	-2.1464
Lmbrd2	1869	4	0.14125	0.12678	1	-1.8469
Nsdhl	1870	4	0.14134	0.12689	1	-3.3666
AI314180	1871	4	0.14145	0.12689	1	-4.0562
Slc35b1	1872	4	0.14145	0.12689	1	-4.0562
Pprc1	1873	4	0.14145	0.12689	1	-4.0562
Ubr2	1874	4	0.14157	0.12689	1	-2.5235
Atp10a	1875	4	0.14161	0.12689	1	-2.1306
Fam188b	1876	4	0.1417	0.12689	1	-2.8517
Bbs7	1877	4	0.14175	0.12689	1	-2.4812
Rpp25	1878	4	0.14184	0.127	1	-2.7198
Cdkn2aip	1879	4	0.14188	0.127	1	-3.3387
Appbp2	1880	4	0.14202	0.12723	1	-2.3805
Wbp1l	1881	4	0.14211	0.12734	1	-2.0304
Gm14345	1882	3	0.14219	0.12874	1	-3.7321
Tmem57	1883	4	0.14234	0.12756	1	-4.0502
Eef1d	1884	4	0.14247	0.12768	1	-3.287
Mob1a	1885	4	0.14252	0.12768	1	-1.7331
Zfp651	1886	4	0.14257	0.12768	1	-2.4199
Nedd8	1887	3	0.14275	0.12919	1	-3.2474
Acvr2b	1888	4	0.14275	0.12802	1	-2.784
Sap130	1889	4	0.14284	0.12802	1	-3.5292
Nnat	1890	4	0.14302	0.12824	1	-3.0402
Prkacb	1891	4	0.14306	0.12824	1	-2.7782
Dusp5	1892	4	0.14311	0.12824	1	-2.7172
Kbtbd7	1893	4	0.1432	0.12835	1	-1.9636
Nup205	1894	4	0.14329	0.12846	1	-4.0395
Itsn2	1895	4	0.14343	0.12856	1	-3.5356
Cdk13	1896	4	0.14354	0.12868	1	-4.0372
Glyr1	1897	4	0.14354	0.12868	1	-4.0372
Dpp8	1898	4	0.14361	0.12868	1	-2.5441
Rab3gap2	1899	4	0.1437	0.12879	1	-4.0363
Zc3h4	1900	4	0.1439	0.12901	1	-3.2923
Pah	1901	4	0.1439	0.12901	1	-3.2923
Esd	1902	4	0.14397	0.12901	1	-2.4783
Tubg1	1903	4	0.14411	0.12922	1	-4.0344
Rps6	1904	3	0.14419	0.13055	1	-3.7095
Tmub1	1905	4	0.1442	0.12933	1	-2.2114
Gm10921	1906	4	0.14424	0.12933	1	-2.6876
Vmn2r96	1907	4	0.14429	0.12933	1	-2.8115
Ttr	1908	4	0.14433	0.12933	1	-2.6225
Taldo1	1909	4	0.14438	0.12933	1	-2.0797
2020-09-06	1910	4	0.14442	0.12933	1	-1.7841
Wwp1	1911	4	0.14451	0.12945	1	-2.7171
Ptcd1	1912	4	0.14465	0.12956	1	-4.0279
Ccp110	1913	4	0.1447	0.12956	1	-2.7975
Gtpbp2	1914	4	0.14479	0.12967	1	-2.6842
Txnrd1	1915	4	0.14483	0.12967	1	-3.2397
Mknk2	1916	4	0.14501	0.12979	1	-3.7187
Rpl38	1917	4	0.14515	0.1299	1	-4.025
Rpa3	1918	4	0.14515	0.1299	1	-4.025
Psma4	1919	4	0.14515	0.1299	1	-4.025
Neto2	1920	4	0.14524	0.1299	1	-2.7002
Mterf1a	1921	4	0.14547	0.13033	1	-2.9241
Rlf	1922	4	0.14551	0.13033	1	-2.7787
Flot2	1923	4	0.14565	0.13055	1	-4.0208
Wdr74	1924	4	0.14585	0.13077	1	-4.0189
Gpaa1	1925	4	0.14601	0.13101	1	-2.0337
Prpsap2	1926	4	0.14605	0.13101	1	-3.54
Afp	1927	4	0.1461	0.13101	1	-3.0406
Ttc36	1928	4	0.14614	0.13101	1	-3.1773
Rps27rt	1929	3	0.14626	0.13258	1	-2.9082
Tmem180	1930	4	0.14628	0.13123	1	-4.0147
Fchsd2	1931	3	0.14646	0.13276	1	-2.7686
Ndufs7	1932	4	0.14651	0.13157	1	-2.8469
Il11ra1	1933	4	0.1466	0.13168	1	-3.7729
Toe1	1934	3	0.14663	0.13286	1	-2.3422
Mrpl4	1935	4	0.14669	0.13179	1	-4.0123
Rad1	1936	3	0.14674	0.13303	1	-3.6847
Pfkm	1937	4	0.14682	0.13189	1	-4.0118
Bag6	1938	4	0.147	0.13221	1	-2.0598
Traf7	1939	4	0.14709	0.13233	1	-2.9398
Ulbp1	1940	4	0.14718	0.13244	1	-2.9135
Zfand2a	1941	4	0.14723	0.13244	1	-2.2439
Arg1	1942	4	0.14732	0.13256	1	-2.2136
Ccdc80	1943	4	0.14741	0.13256	1	-2.3148
Msh3	1944	4	0.1475	0.13256	1	-1.683
Taf4a	1945	4	0.14759	0.13268	1	-2.5961
Isg15	1946	4	0.14764	0.13268	1	-2.552
Trmt12	1947	4	0.14773	0.1328	1	-2.5206
Utp6	1948	4	0.14777	0.1328	1	-3.1681
St3gal1	1949	4	0.14791	0.13302	1	-2.8924
Arfrp1	1950	3	0.14828	0.13477	1	-3.6698
Abhd5	1951	4	0.14831	0.13382	1	-2.8175
Gins3	1952	4	0.14838	0.13382	1	-4.0009
Acot13	1953	4	0.14845	0.13382	1	-2.6319
Ppp1r8	1954	4	0.14849	0.13382	1	-4.0004
Ctla2a	1955	4	0.14858	0.13394	1	-3.3824
Piga	1956	4	0.14872	0.13416	1	-2.8532
Cd37	1957	4	0.14876	0.13416	1	-2.2481
Cks2	1958	4	0.14881	0.13416	1	-2.7779
Dhx38	1959	4	0.14892	0.13428	1	-3.9966
Atp6v0e	1960	4	0.14904	0.1344	1	-2.1127
Flii	1961	4	0.14917	0.13462	1	-3.6966
Ldhd	1962	4	0.14926	0.13474	1	-2.7124
Amz1	1963	4	0.14931	0.13474	1	-2.608
Psmd14	1964	4	0.14951	0.13474	1	-3.9932
Cops8	1965	4	0.14951	0.13474	1	-3.9932
Zfp516	1966	4	0.14967	0.13474	1	-3.0666
Dph3	1967	4	0.14971	0.13474	1	-3.6944
Slco5a1	1968	4	0.14985	0.13498	1	-3.4498
H2-D1	1969	4	0.14989	0.13498	1	-3.366
Akt1	1970	4	0.15003	0.1352	1	-2.1492
Asb8	1971	4	0.15007	0.1352	1	-1.9871
Ak1	1972	4	0.15016	0.1352	1	-2.8489
Armc5	1973	3	0.15017	0.13716	1	-3.5095
Metap1	1974	2	0.15017	0.13603	0	0
Pno1	1975	4	0.15025	0.13531	1	-3.4928
Glrp1	1976	4	0.1503	0.13531	1	-3.0194
Tmem119	1977	4	0.15034	0.13531	1	-2.4053
Brca1	1978	4	0.15039	0.13531	1	-2.8274
Sh3pxd2b	1979	4	0.15048	0.13543	1	-2.7245
Nup35	1980	4	0.15066	0.13554	1	-3.4464
Ldlrad4	1981	4	0.1507	0.13554	1	-2.8417
Mak16	1982	4	0.15084	0.13576	1	-3.985
Rhot1	1983	4	0.15088	0.13576	1	-2.4407
Eif2d	1984	4	0.15093	0.13576	1	-2.2053
Mrps26	1985	4	0.15102	0.13588	1	-2.455
Jak3	1986	4	0.15106	0.13588	1	-2.395
Pddc1	1987	4	0.15115	0.13588	1	-3.746
Wbscr22	1988	4	0.1512	0.13588	1	-3.9821
Trp53inp1	1989	4	0.15124	0.13588	1	-3.4544
Rbm45	1990	4	0.15133	0.136	1	-3.4953
Zfp629	1991	4	0.15138	0.136	1	-2.5214
Meis1	1992	4	0.15142	0.136	1	-2.3349
Mtmr2	1993	4	0.15147	0.136	1	-2.6931
Denr	1994	4	0.15169	0.13646	1	-3.537
Olfr472	1995	4	0.15174	0.13646	1	-3.3563
2700029M09Rik	1996	4	0.15178	0.13646	1	-3.9753
Psmc5	1997	4	0.15196	0.13669	1	-3.9729
Wdsub1	1998	4	0.15201	0.13669	1	-2.6776
Nfyc	1999	4	0.15205	0.13669	1	-2.6715
[truncated: 10,203 more rows]

## Sheet: sgRNA Summary
sgrna	Gene ID	MHCII_Hi_count (Rep1/Rep2)	MHCII_Low_count (Rep1/Rep2)	LFC
0610009B22Rik_sg1	0610009B22Rik	0/0	0/0	-0.42903
0610009B22Rik_sg2	0610009B22Rik	11.775/111.82	67.964/15.689	-0.55215
0610009B22Rik_sg3	0610009B22Rik	4.8486/35.816	37.58/2.2413	-0.028793
0610009B22Rik_sg4	0610009B22Rik	44.33/13.103	59.968/7.4711	0.22448
0610010F05Rik_sg1	0610010F05Rik	38.789/0	14.392/33.62	0.29411
0610010F05Rik_sg2	0610010F05Rik	194.64/11.356	18.39/68.734	-1.2226
0610010F05Rik_sg3	0610010F05Rik	40.174/56.781	63.167/34.367	0.0084058
0610010F05Rik_sg4	0610010F05Rik	80.348/13.103	25.586/17.184	-1.0922
0610010K14Rik_sg1	0610010K14Rik	4.8486/98.712	283.05/7.4711	1.4705
0610010K14Rik_sg2	0610010K14Rik	26.321/9.6092	22.388/215.92	2.6634
0610010K14Rik_sg3	0610010K14Rik	145.46/25.333	23.188/32.126	-1.5921
0610010K14Rik_sg4	0610010K14Rik	63.724/78.62	79.158/56.033	-0.073328
0610030E20Rik_sg1	0610030E20Rik	40.867/29.701	30.384/32.873	-0.1532
0610030E20Rik_sg2	0610030E20Rik	76.192/9.6092	0/0	-5.4562
0610030E20Rik_sg3	0610030E20Rik	21.472/42.804	14.392/44.08	-0.13224
0610030E20Rik_sg4	0610030E20Rik	0/72.505	27.985/67.24	0.38398
0610040J01Rik_sg1	0610040J01Rik	0/12.23	16.791/0	0.40113
0610040J01Rik_sg2	0610040J01Rik	170.39/119.68	16.791/73.964	-1.6548
0610040J01Rik_sg3	0610040J01Rik	20.087/19.218	96.749/0	1.2574
0610040J01Rik_sg4	0610040J01Rik	30.477/30.575	72.762/24.655	0.65695
1110004F10Rik_sg1	1110004F10Rik	15.931/30.575	27.186/24.655	0.15053
1110004F10Rik_sg2	1110004F10Rik	4.1559/59.402	0/10.46	-2.3955
1110004F10Rik_sg3	1110004F10Rik	26.321/10.483	12.793/12.701	-0.49707
1110004F10Rik_sg4	1110004F10Rik	13.16/14.851	6.3966/97.124	1.814
1110008P14Rik_sg1	1110008P14Rik	201.56/15.724	17.591/39.597	-1.8895
1110008P14Rik_sg2	1110008P14Rik	21.472/97.839	15.192/55.286	-0.74309
1110008P14Rik_sg3	1110008P14Rik	15.238/69.885	62.367/112.81	1.0241
1110008P14Rik_sg4	1110008P14Rik	51.949/35.816	59.968/259.25	1.8393
1110017D15Rik_sg1	1110017D15Rik	56.798/33.195	0.79958/79.941	-0.15293
1110017D15Rik_sg2	1110017D15Rik	27.706/53.287	27.985/26.896	-0.54504
1110017D15Rik_sg3	1110017D15Rik	27.706/16.598	25.586/24.655	0.17405
1110017D15Rik_sg4	1110017D15Rik	18.702/56.781	102.35/21.666	0.70161
1110025L11Rik_sg1	1110025L11Rik	29.784/17.471	53.572/39.597	0.9502
1110025L11Rik_sg2	1110025L11Rik	0/27.08	94.35/9.7124	1.8668
1110025L11Rik_sg3	1110025L11Rik	22.165/421.06	46.376/150.17	-1.1651
1110025L11Rik_sg4	1110025L11Rik	28.399/174.71	54.371/23.16	-1.3668
1110032A03Rik_sg1	1110032A03Rik	146.84/73.379	29.584/123.27	-0.52106
1110032A03Rik_sg2	1110032A03Rik	18.702/9.6092	0/20.919	-0.40329
1110032A03Rik_sg3	1110032A03Rik	6.2339/117.93	45.576/0	-1.407
1110032A03Rik_sg4	1110032A03Rik	202.95/41.931	0/0	-6.9477
1110032F04Rik_sg1	1110032F04Rik	13.853/20.965	15.192/11.207	-0.37461
1110032F04Rik_sg2	1110032F04Rik	35.326/107.45	87.954/8.9653	-0.54948
1110032F04Rik_sg3	1110032F04Rik	51.257/30.575	100.75/103.85	1.3012
1110032F04Rik_sg4	1110032F04Rik	13.853/26.207	0/12.701	-1.5165
1110038F14Rik_sg1	1110038F14Rik	19.394/3.4942	10.395/9.7124	-0.17099
1110038F14Rik_sg2	1110038F14Rik	27.706/27.08	15.192/35.114	-0.11857
1110038F14Rik_sg3	1110038F14Rik	13.853/48.046	57.57/57.528	0.87384
1110038F14Rik_sg4	1110038F14Rik	82.426/100.46	44.776/73.964	-0.61473
1110051M20Rik_sg1	1110051M20Rik	148.23/42.804	76.759/82.182	-0.26231
1110051M20Rik_sg2	1110051M20Rik	20.087/48.046	31.184/38.85	0.038574
1110051M20Rik_sg3	1110051M20Rik	38.789/95.218	118.34/148.68	0.98399
1110051M20Rik_sg4	1110051M20Rik	169.01/26.207	143.92/85.918	0.23337
1110059E24Rik_sg1	1110059E24Rik	38.096/18.345	156.72/24.655	1.6497
1110059E24Rik_sg2	1110059E24Rik	4.8486/55.034	0/39.597	-0.57306
1110059E24Rik_sg3	1110059E24Rik	6.2339/13.103	54.371/8.9653	1.6145
1110059E24Rik_sg4	1110059E24Rik	27.014/265.56	0/43.332	-2.7
1110059G10Rik_sg1	1110059G10Rik	154.46/41.931	62.367/47.068	-0.83216
1110059G10Rik_sg2	1110059G10Rik	27.706/207.91	0/5.9769	-4.8966
1110059G10Rik_sg3	1110059G10Rik	127.45/2.6207	106.34/130.74	0.85624
1110059G10Rik_sg4	1110059G10Rik	20.087/37.563	68.764/64.999	1.1865
1110065P20Rik_sg1	1110065P20Rik	11.775/7.862	66.365/0	1.6597
1110065P20Rik_sg2	1110065P20Rik	27.706/20.092	24.787/1.4942	-0.81625
1110065P20Rik_sg3	1110065P20Rik	38.096/40.184	25.586/0	-1.5411
1110065P20Rik_sg4	1110065P20Rik	228.58/22.713	90.352/35.114	-0.99067
1190005I06Rik_sg1	1190005I06Rik	92.816/34.069	28.785/87.412	-0.12489
1190005I06Rik_sg2	1190005I06Rik	15.931/103.08	188.7/76.952	1.1452
1190005I06Rik_sg3	1190005I06Rik	17.316/0	36.781/0	1.0055
1190005I06Rik_sg4	1190005I06Rik	188.4/6.9885	70.363/35.114	-0.87703
1190007I07Rik_sg1	1190007I07Rik	20.087/113.56	65.565/53.045	-0.16953
1190007I07Rik_sg2	1190007I07Rik	44.33/55.034	24.787/101.61	0.34103
1190007I07Rik_sg3	1190007I07Rik	76.192/30.575	12.793/55.286	-0.63418
1190007I07Rik_sg4	1190007I07Rik	24.936/0	32.783/32.126	1.3127
1300017J02Rik_sg1	1300017J02Rik	47.793/6.9885	30.384/70.976	0.86417
1300017J02Rik_sg2	1300017J02Rik	22.858/53.287	89.553/203.96	1.919
1300017J02Rik_sg3	1300017J02Rik	61.647/34.942	57.57/38.103	-0.013476
1300017J02Rik_sg4	1300017J02Rik	15.238/0	35.181/27.643	1.9109
1500009L16Rik_sg1	1500009L16Rik	8.3119/122.3	143.92/54.539	0.59614
1500009L16Rik_sg2	1500009L16Rik	15.238/18.345	59.169/67.987	1.8598
1500009L16Rik_sg3	1500009L16Rik	16.624/69.011	87.154/165.86	1.541
1500009L16Rik_sg4	1500009L16Rik	0/77.747	0/0	-5.3174
1600012H06Rik_sg1	1600012H06Rik	23.55/123.17	150.32/35.861	0.33951
1600012H06Rik_sg2	1600012H06Rik	6.9266/3.4942	9.5949/20.172	1.3548
1600012H06Rik_sg3	1600012H06Rik	4.1559/6.1149	20.789/62.01	2.7888
1600012H06Rik_sg4	1600012H06Rik	25.628/64.643	73.561/22.413	0.086517
1600014C10Rik_sg1	1600014C10Rik	67.88/144.14	17.591/107.58	-0.75092
1600014C10Rik_sg2	1600014C10Rik	42.945/0	79.958/37.356	1.4085
1600014C10Rik_sg3	1600014C10Rik	30.477/40.184	17.591/47.068	-0.12438
1600014C10Rik_sg4	1600014C10Rik	74.114/8.7356	42.378/76.205	0.50704
1600014C23Rik_sg1	1600014C23Rik	13.853/15.724	176.71/90.4	3.0912
1600014C23Rik_sg2	1600014C23Rik	61.647/22.713	19.989/83.676	0.29109
1600014C23Rik_sg3	1600014C23Rik	39.481/0	87.154/52.298	1.7698
1600014C23Rik_sg4	1600014C23Rik	78.963/31.448	76.759/5.9769	-0.40773
1700001C19Rik_sg1	1700001C19Rik	189.1/44.552	76.759/70.228	-0.66143
1700001C19Rik_sg2	1700001C19Rik	21.472/20.092	24.787/44.08	0.70196
1700001C19Rik_sg3	1700001C19Rik	141.99/102.21	46.376/50.804	-1.3117
1700001C19Rik_sg4	1700001C19Rik	18.009/155.49	59.968/24.655	-1.0187
1700001F09Rik_sg1	1700001F09Rik	0/0	2.3987/0	0.70806
1700001F09Rik_sg2	1700001F09Rik	114.98/182.57	23.188/88.159	-1.4021
1700001F09Rik_sg3	1700001F09Rik	3.4633/0	25.586/0	2.3361
1700001F09Rik_sg4	1700001F09Rik	2.078/3.4942	0/29.137	2.0399
1700001J03Rik_sg1	1700001J03Rik	15.931/44.552	51.173/33.62	0.47412
1700001J03Rik_sg2	1700001J03Rik	36.711/65.517	47.975/22.413	-0.52592
1700001J03Rik_sg3	1700001J03Rik	2.7706/2.6207	0.79958/23.16	1.8124
1700001J03Rik_sg4	1700001J03Rik	178.71/28.827	62.367/31.379	-1.1299
1700001K19Rik_sg1	1700001K19Rik	24.936/80.367	36.781/8.2182	-1.191
1700001K19Rik_sg2	1700001K19Rik	40.867/155.49	11.994/33.62	-2.0587
1700001K19Rik_sg3	1700001K19Rik	142.69/61.149	144.72/38.103	-0.15533
1700001K19Rik_sg4	1700001K19Rik	117.06/102.21	122.34/14.942	-0.66782
1700001L19Rik_sg1	1700001L19Rik	0/0	0/0	-0.42903
1700001L19Rik_sg2	1700001L19Rik	40.174/106.57	31.983/31.379	-1.1864
1700001L19Rik_sg3	1700001L19Rik	67.88/163.36	30.384/95.63	-0.86549
1700001L19Rik_sg4	1700001L19Rik	41.559/21.839	27.186/118.79	1.178
1700001O22Rik_sg1	1700001O22Rik	72.729/135.4	108.74/12.701	-0.76744
1700001O22Rik_sg2	1700001O22Rik	13.16/7.862	0/27.643	0.36465
1700001O22Rik_sg3	1700001O22Rik	6.9266/34.069	37.58/8.9653	0.17515
1700001O22Rik_sg4	1700001O22Rik	49.871/124.05	114.34/143.45	0.56242
1700001P01Rik_sg1	1700001P01Rik	20.087/59.402	0/0	-5.3485
1700001P01Rik_sg2	1700001P01Rik	74.114/163.36	0/35.114	-2.6898
1700001P01Rik_sg3	1700001P01Rik	20.78/15.724	0/0	-4.2669
1700001P01Rik_sg4	1700001P01Rik	119.14/50.666	7.9958/102.35	-0.61276
1700003E16Rik_sg1	1700003E16Rik	114.98/222.76	31.184/62.757	-1.8242
1700003E16Rik_sg2	1700003E16Rik	10.39/31.448	67.165/40.344	1.3208
1700003E16Rik_sg3	1700003E16Rik	86.582/37.563	122.34/79.194	0.69015
1700003E16Rik_sg4	1700003E16Rik	16.624/0	21.589/56.033	2.096
1700003F12Rik_sg1	1700003F12Rik	19.394/10.483	19.989/81.435	1.698
1700003F12Rik_sg2	1700003F12Rik	4.8486/39.31	9.5949/43.332	0.25092
1700003F12Rik_sg3	1700003F12Rik	65.11/55.908	34.382/116.55	0.31402
1700003F12Rik_sg4	1700003F12Rik	33.94/6.1149	128.73/80.688	2.3298
1700006A11Rik_sg1	1700006A11Rik	87.968/151.13	61.568/65.746	-0.89872
1700006A11Rik_sg2	1700006A11Rik	38.789/2.6207	27.186/38.103	0.63235
1700006A11Rik_sg3	1700006A11Rik	60.954/61.149	109.54/4.4827	-0.097105
1700006A11Rik_sg4	1700006A11Rik	75.5/33.195	65.565/28.39	-0.20615
1700007K13Rik_sg1	1700007K13Rik	88.66/82.988	19.19/40.344	-1.4967
1700007K13Rik_sg2	1700007K13Rik	39.481/65.517	230.28/70.228	1.4994
1700007K13Rik_sg3	1700007K13Rik	46.408/0	36.781/103.85	1.5589
1700007K13Rik_sg4	1700007K13Rik	38.096/28.827	23.188/94.136	0.79181
1700008O03Rik_sg1	1700008O03Rik	23.55/3.4942	49.574/9.7124	1.0773
1700008O03Rik_sg2	1700008O03Rik	31.862/0	92.751/46.321	2.0587
1700008O03Rik_sg3	1700008O03Rik	33.248/88.23	64.766/105.34	0.47907
1700008O03Rik_sg4	1700008O03Rik	64.417/55.908	103.15/59.769	0.431
1700008P02Rik_sg1	1700008P02Rik	159.31/39.31	23.987/35.861	-1.6977
1700008P02Rik_sg2	1700008P02Rik	23.55/81.241	118.34/5.2298	0.23367
1700008P02Rik_sg3	1700008P02Rik	66.495/17.471	39.179/55.286	0.16624
1700008P02Rik_sg4	1700008P02Rik	128.83/0	111.94/25.402	0.090896
1700009N14Rik_sg1	1700009N14Rik	143.38/55.034	5.597/32.873	-2.3081
1700009N14Rik_sg2	1700009N14Rik	17.316/12.23	48.774/54.539	1.7391
1700009N14Rik_sg3	1700009N14Rik	15.931/40.184	19.989/80.688	0.82114
1700009N14Rik_sg4	1700009N14Rik	65.802/189.56	51.173/103.1	-0.71973
1700010B08Rik_sg1	1700010B08Rik	68.573/6.1149	40.778/22.413	-0.23431
1700010B08Rik_sg2	1700010B08Rik	17.316/13.103	42.378/22.413	1.0428
1700010B08Rik_sg3	1700010B08Rik	36.711/28.827	9.5949/26.149	-0.83947
1700010B08Rik_sg4	1700010B08Rik	75.5/69.885	103.95/53.045	0.10935
1700010I14Rik_sg1	1700010I14Rik	270.14/338.94	81.557/138.96	-1.4574
1700010I14Rik_sg2	1700010I14Rik	9.0045/0	18.39/0	0.88978
1700010I14Rik_sg3	1700010I14Rik	27.706/48.919	166.31/24.655	1.2953
1700010I14Rik_sg4	1700010I14Rik	6.9266/14.851	23.987/36.608	1.3965
1700011L22Rik_sg1	1700011L22Rik	20.087/48.046	126.33/47.815	1.3286
1700011L22Rik_sg2	1700011L22Rik	100.44/20.965	84.755/30.632	-0.072081
1700011L22Rik_sg3	1700011L22Rik	38.789/36.69	95.949/29.137	0.71395
1700011L22Rik_sg4	1700011L22Rik	57.491/14.851	185.5/0	1.3347
1700012A03Rik_sg1	1700012A03Rik	97.665/96.965	51.973/46.321	-0.97125
1700012A03Rik_sg2	1700012A03Rik	24.936/16.598	95.15/17.184	1.3931
1700012A03Rik_sg3	1700012A03Rik	52.642/31.448	57.57/79.941	0.69645
1700012A03Rik_sg4	1700012A03Rik	42.252/28.827	59.169/117.3	1.2881
1700012B07Rik_sg1	1700012B07Rik	74.807/167.72	48.774/75.458	-0.95393
1700012B07Rik_sg2	1700012B07Rik	51.257/32.322	31.983/91.148	0.54812
1700012B07Rik_sg3	1700012B07Rik	45.715/0	55.97/50.056	1.1789
1700012B07Rik_sg4	1700012B07Rik	26.321/26.207	93.551/70.976	1.6107
1700012B09Rik_sg1	1700012B09Rik	53.335/6.9885	34.382/9.7124	-0.43518
1700012B09Rik_sg2	1700012B09Rik	13.16/111.82	9.5949/15.689	-2.2184
1700012B09Rik_sg3	1700012B09Rik	81.734/26.207	15.992/17.184	-1.6441
1700012B09Rik_sg4	1700012B09Rik	132.3/25.333	87.154/179.31	0.74997
1700012P22Rik_sg1	1700012P22Rik	122.6/101.33	0/3.7356	-5.2998
1700012P22Rik_sg2	1700012P22Rik	78.963/28.827	47.175/59.769	-0.011166
1700012P22Rik_sg3	1700012P22Rik	47.101/21.839	3.9979/91.148	0.45355
1700012P22Rik_sg4	1700012P22Rik	24.243/33.195	0/5.2298	-3.0394
1700013D24Rik_sg1	1700013D24Rik	27.014/48.919	14.392/73.964	0.21339
1700013D24Rik_sg2	1700013D24Rik	88.66/49.793	13.593/14.195	-2.2373
1700013D24Rik_sg3	1700013D24Rik	63.032/163.36	128.73/118.04	0.12336
1700013D24Rik_sg4	1700013D24Rik	5.5413/83.862	0/7.4711	-3.2706
1700013F07Rik_sg1	1700013F07Rik	204.33/9.6092	109.54/133.73	0.18375
1700013F07Rik_sg2	1700013F07Rik	20.087/58.529	254.27/103.1	2.1563
1700013F07Rik_sg3	1700013F07Rik	15.931/60.276	19.989/183.79	1.3957
1700013F07Rik_sg4	1700013F07Rik	100.44/30.575	34.382/31.379	-0.97302
1700013G24Rik_sg1	1700013G24Rik	9.0045/6.1149	0/32.873	1.0265
1700013G24Rik_sg2	1700013G24Rik	187.02/27.08	29.584/17.931	-2.1257
1700013G24Rik_sg3	1700013G24Rik	31.17/11.356	64.766/9.7124	0.78041
1700013G24Rik_sg4	1700013G24Rik	11.775/69.885	19.19/46.321	-0.30942
1700013H16Rik_sg1	1700013H16Rik	76.192/62.023	4.7975/69.481	-0.87829
1700013H16Rik_sg2	1700013H16Rik	92.816/44.552	102.35/0	-0.41752
1700013H16Rik_sg3	1700013H16Rik	254.21/176.46	95.949/20.919	-1.8639
1700013H16Rik_sg4	1700013H16Rik	46.408/96.092	33.582/66.493	-0.50143
1700015G11Rik_sg1	1700015G11Rik	59.569/14.851	100.75/64.252	1.1278
1700015G11Rik_sg2	1700015G11Rik	67.88/67.264	95.15/90.4	0.45158
1700015G11Rik_sg3	1700015G11Rik	36.711/85.609	67.964/10.46	-0.62836
1700015G11Rik_sg4	1700015G11Rik	36.018/23.586	23.188/20.919	-0.41805
1700016C15Rik_sg1	1700016C15Rik	42.252/0	0/30.632	-0.43948
1700016C15Rik_sg2	1700016C15Rik	23.55/25.333	79.158/16.436	0.9396
1700016C15Rik_sg3	1700016C15Rik	3.4633/84.735	54.371/115.8	0.93269
1700016C15Rik_sg4	1700016C15Rik	27.014/107.45	251.87/106.84	1.4023
1700016D06Rik_sg1	1700016D06Rik	36.018/76	55.97/0	-0.97587
1700016D06Rik_sg2	1700016D06Rik	19.394/37.563	2.3987/0	-3.7445
1700016D06Rik_sg3	1700016D06Rik	29.784/76	33.582/59.022	-0.18817
1700016D06Rik_sg4	1700016D06Rik	39.481/51.54	126.33/31.379	0.77984
1700016H13Rik_sg1	1700016H13Rik	27.014/23.586	5.597/35.861	-0.27542
1700016H13Rik_sg2	1700016H13Rik	42.252/72.505	4.7975/91.148	-0.25347
1700016H13Rik_sg3	1700016H13Rik	29.784/76.873	127.93/23.908	0.50164
1700016H13Rik_sg4	1700016H13Rik	8.3119/0	0/65.746	2.7158
1700016K19Rik_sg1	1700016K19Rik	22.165/200.92	24.787/26.896	-2.0679
1700016K19Rik_sg2	1700016K19Rik	230.65/69.885	55.171/2.9884	-2.3303
1700016K19Rik_sg3	1700016K19Rik	67.88/55.034	14.392/26.149	-1.554
1700016K19Rik_sg4	1700016K19Rik	15.931/39.31	2.3987/74.711	0.4668
1700017B05Rik_sg1	1700017B05Rik	0.69266/55.908	0/56.78	0.0044237
1700017B05Rik_sg2	1700017B05Rik	0/156.37	72.762/20.919	-0.72697
1700017B05Rik_sg3	1700017B05Rik	35.326/51.54	23.188/11.954	-1.2586
1700017B05Rik_sg4	1700017B05Rik	29.092/100.46	21.589/29.884	-1.2987
1700018B08Rik_sg1	1700018B08Rik	33.94/25.333	79.158/42.585	1.014
1700018B08Rik_sg2	1700018B08Rik	175.24/28.827	79.958/28.39	-0.90107
1700018B08Rik_sg3	1700018B08Rik	24.243/10.483	28.785/30.632	0.74183
1700018B08Rik_sg4	1700018B08Rik	90.738/193.06	283.85/85.918	0.37942
1700018F24Rik_sg1	1700018F24Rik	121.91/20.092	11.994/130	-8.6284e-05
1700018F24Rik_sg2	1700018F24Rik	18.009/14.851	95.15/49.309	2.0709
1700018F24Rik_sg3	1700018F24Rik	120.52/62.896	70.363/50.804	-0.59018
1700018F24Rik_sg4	1700018F24Rik	51.257/38.437	63.966/18.678	-0.11541
1700019A02Rik_sg1	1700019A02Rik	111.52/0	34.382/70.228	-0.090573
1700019A02Rik_sg2	1700019A02Rik	81.041/41.931	167.91/56.78	0.85913
1700019A02Rik_sg3	1700019A02Rik	33.248/6.9885	123.93/19.425	1.7831
1700019A02Rik_sg4	1700019A02Rik	196.71/179.95	235.08/96.377	-0.18345
1700019D03Rik_sg1	1700019D03Rik	50.564/27.954	24.787/76.205	0.35515
1700019D03Rik_sg2	1700019D03Rik	42.945/119.68	24.787/81.435	-0.60517
1700019D03Rik_sg3	1700019D03Rik	68.573/17.471	105.54/0	0.28863
1700019D03Rik_sg4	1700019D03Rik	87.275/176.46	0.79958/26.149	-3.1984
1700019N19Rik_sg1	1700019N19Rik	45.023/20.965	76.759/125.51	1.5872
1700019N19Rik_sg2	1700019N19Rik	9.6972/28.827	68.764/69.481	1.7911
1700019N19Rik_sg3	1700019N19Rik	24.243/45.425	18.39/76.952	0.44174
1700019N19Rik_sg4	1700019N19Rik	80.348/58.529	28.785/32.126	-1.1631
1700020A23Rik_sg1	1700020A23Rik	23.55/138.02	12.793/51.551	-1.3019
1700020A23Rik_sg2	1700020A23Rik	88.66/61.149	91.951/30.632	-0.28515
1700020A23Rik_sg3	1700020A23Rik	55.413/223.63	62.367/61.263	-1.1616
1700020A23Rik_sg4	1700020A23Rik	0/101.33	35.181/0	-1.4746
1700020D05Rik_sg1	1700020D05Rik	40.174/42.804	99.148/128.5	1.4343
1700020D05Rik_sg2	1700020D05Rik	15.931/51.54	253.47/0	1.8786
1700020D05Rik_sg3	1700020D05Rik	8.3119/100.46	130.33/67.987	0.85471
1700020D05Rik_sg4	1700020D05Rik	135.07/119.68	53.572/72.47	-1.0037
1700020L24Rik_sg1	1700020L24Rik	44.33/54.161	20.789/32.126	-0.8718
1700020L24Rik_sg2	1700020L24Rik	49.179/57.655	36.781/47.068	-0.34226
1700020L24Rik_sg3	1700020L24Rik	96.279/82.115	127.13/244.31	1.0497
1700020L24Rik_sg4	1700020L24Rik	58.876/103.95	15.992/26.896	-1.8766
1700020N15Rik_sg1	1700020N15Rik	19.394/92.597	194.3/182.3	1.7317
1700020N15Rik_sg2	1700020N15Rik	100.44/8.7356	112.74/0	0.045595
1700020N15Rik_sg3	1700020N15Rik	41.559/20.965	79.158/63.504	1.1648
1700020N15Rik_sg4	1700020N15Rik	58.876/7.862	55.97/30.632	0.36623
1700021F07Rik_sg1	1700021F07Rik	125.37/21.839	76.759/8.9653	-0.76629
1700021F07Rik_sg2	1700021F07Rik	5.5413/20.092	35.181/0	0.42818
1700021F07Rik_sg3	1700021F07Rik	114.29/71.632	57.57/25.402	-1.1451
1700021F07Rik_sg4	1700021F07Rik	78.27/34.069	116.74/26.896	0.34903
1700022I11Rik_sg1	1700022I11Rik	0/19.218	11.194/0	-0.68542
1700022I11Rik_sg2	1700022I11Rik	6.9266/210.53	0/91.895	-1.2248
1700022I11Rik_sg3	1700022I11Rik	99.05/134.53	59.169/12.701	-1.6732
1700022I11Rik_sg4	1700022I11Rik	45.715/30.575	0/0	-5.2908
1700024G13Rik_sg1	1700024G13Rik	28.399/20.092	12.793/42.585	0.18449
1700024G13Rik_sg2	1700024G13Rik	0/5.2414	0/0	-1.8563
1700024G13Rik_sg3	1700024G13Rik	10.39/45.425	42.378/72.47	1.0151
1700024G13Rik_sg4	1700024G13Rik	31.862/29.701	64.766/21.666	0.47638
1700025G04Rik_sg1	1700025G04Rik	39.481/10.483	87.954/0	0.79166
1700025G04Rik_sg2	1700025G04Rik	53.335/27.08	0/100.11	0.30919
1700025G04Rik_sg3	1700025G04Rik	16.624/11.356	40.778/5.2298	0.67928
1700025G04Rik_sg4	1700025G04Rik	4.1559/18.345	31.184/33.62	1.4471
1700028K03Rik_sg1	1700028K03Rik	87.275/25.333	90.352/70.976	0.51106
1700028K03Rik_sg2	1700028K03Rik	49.179/66.391	144.72/78.447	0.93751
1700028K03Rik_sg3	1700028K03Rik	78.963/43.678	0/50.056	-1.2596
1700028K03Rik_sg4	1700028K03Rik	29.092/28.827	122.34/53.045	1.5658
1700028P14Rik_sg1	1700028P14Rik	0/0	0/0	-0.42903
1700028P14Rik_sg2	1700028P14Rik	74.114/20.965	183.1/52.298	1.2901
1700028P14Rik_sg3	1700028P14Rik	31.17/0	21.589/7.4711	-0.094817
1700028P14Rik_sg4	1700028P14Rik	54.72/59.402	9.5949/43.332	-1.08
1700029F12Rik_sg1	1700029F12Rik	42.945/3.4942	82.357/0	0.80033
1700029F12Rik_sg2	1700029F12Rik	13.16/115.31	16.791/57.528	-0.77361
1700029F12Rik_sg3	1700029F12Rik	45.715/108.32	71.162/140.46	0.45316
1700029F12Rik_sg4	1700029F12Rik	16.624/76	83.956/3.7356	-0.077231
1700029H14Rik_sg1	1700029H14Rik	15.931/65.517	0/79.941	-0.026296
1700029H14Rik_sg2	1700029H14Rik	65.802/6.9885	25.586/16.436	-0.76461
1700029H14Rik_sg3	1700029H14Rik	16.624/9.6092	7.1962/5.2298	-0.96871
1700029H14Rik_sg4	1700029H14Rik	163.47/96.965	60.768/135.97	-0.40105
1700029I15Rik_sg1	1700029I15Rik	31.17/50.666	0/116.55	0.49984
1700029I15Rik_sg2	1700029I15Rik	133.68/6.1149	11.994/32.873	-1.5972
1700029I15Rik_sg3	1700029I15Rik	96.972/17.471	197.5/9.7124	0.84531
1700029I15Rik_sg4	1700029I15Rik	57.491/10.483	28.785/5.9769	-0.9286
1700029J07Rik_sg1	1700029J07Rik	47.793/141.52	5.597/50.056	-1.7304
1700029J07Rik_sg2	1700029J07Rik	45.715/75.126	59.169/99.366	0.38609
1700029J07Rik_sg3	1700029J07Rik	29.092/84.735	113.54/30.632	0.33569
1700029J07Rik_sg4	1700029J07Rik	11.083/117.93	45.576/109.83	0.26474
1700029P11Rik_sg1	1700029P11Rik	121.91/13.103	16.791/69.481	-0.63426
1700029P11Rik_sg2	1700029P11Rik	0/0	0/2.9884	0.88956
1700029P11Rik_sg3	1700029P11Rik	6.9266/116.18	20.789/1.4942	-2.3652
1700029P11Rik_sg4	1700029P11Rik	50.564/61.149	11.194/45.574	-0.9523
1700030J22Rik_sg1	1700030J22Rik	55.413/94.344	40.778/113.56	0.042917
1700030J22Rik_sg2	1700030J22Rik	41.559/26.207	47.975/0	-0.48133
1700030J22Rik_sg3	1700030J22Rik	7.6192/25.333	87.154/73.964	2.2224
1700030J22Rik_sg4	1700030J22Rik	27.014/20.092	47.175/32.126	0.72739
1700030K09Rik_sg1	1700030K09Rik	0.69266/214.02	7.9958/33.62	-2.3129
1700030K09Rik_sg2	1700030K09Rik	13.16/27.08	63.966/193.5	2.6188
1700030K09Rik_sg3	1700030K09Rik	60.954/6.9885	72.762/35.861	0.66141
1700030K09Rik_sg4	1700030K09Rik	96.279/192.18	92.751/145.69	-0.27269
1700031F05Rik_sg1	1700031F05Rik	27.706/130.16	40.778/48.562	-0.80754
1700031F05Rik_sg2	1700031F05Rik	20.087/3.4942	0/97.124	1.9542
1700031F05Rik_sg3	1700031F05Rik	43.637/26.207	60.768/123.27	1.3727
1700031F05Rik_sg4	1700031F05Rik	52.642/11.356	0/85.171	0.40141
1700034E13Rik_sg1	1700034E13Rik	119.83/82.988	21.589/79.941	-0.9843
1700034E13Rik_sg2	1700034E13Rik	103.9/28.827	132.73/81.435	0.6821
1700034E13Rik_sg3	1700034E13Rik	123.29/7.862	7.1962/7.4711	-2.998
1700034E13Rik_sg4	1700034E13Rik	172.47/201.79	15.992/29.884	-2.9744
1700034J05Rik_sg1	1700034J05Rik	40.174/46.299	79.958/43.332	0.50197
1700034J05Rik_sg2	1700034J05Rik	171.09/106.57	93.551/189.77	0.028887
1700034J05Rik_sg3	1700034J05Rik	92.816/21.839	63.966/93.389	0.45
1700034J05Rik_sg4	1700034J05Rik	13.853/10.483	77.559/14.195	1.8319
1700037C18Rik_sg1	1700037C18Rik	19.394/7.862	34.382/3.7356	0.45547
1700037C18Rik_sg2	1700037C18Rik	13.16/3.4942	97.549/41.838	2.922
1700037C18Rik_sg3	1700037C18Rik	36.018/71.632	19.19/85.171	-0.043944
1700037C18Rik_sg4	1700037C18Rik	46.408/34.942	39.979/18.678	-0.45852
1700037H04Rik_sg1	1700037H04Rik	6.2339/151.13	87.954/27.643	-0.43844
1700037H04Rik_sg2	1700037H04Rik	77.578/34.942	69.563/72.47	0.3308
1700037H04Rik_sg3	1700037H04Rik	191.87/94.344	43.977/8.2182	-2.4109
1700037H04Rik_sg4	1700037H04Rik	105.28/72.505	61.568/67.987	-0.45065
1700042G07Rik_sg1	1700042G07Rik	129.53/31.448	63.966/50.804	-0.48098
1700042G07Rik_sg2	1700042G07Rik	78.27/29.701	191.1/58.275	1.1927
1700042G07Rik_sg3	1700042G07Rik	4.1559/0	0/0	-1.622
1700042G07Rik_sg4	1700042G07Rik	119.14/17.471	88.753/12.701	-0.42202
1700056E22Rik_sg1	1700056E22Rik	18.009/14.851	29.584/24.655	0.69002
1700056E22Rik_sg2	1700056E22Rik	148.92/25.333	39.979/48.562	-0.96102
1700056E22Rik_sg3	1700056E22Rik	112.21/130.16	37.58/48.562	-1.4712
1700056E22Rik_sg4	1700056E22Rik	9.0045/19.218	31.983/6.724	0.42964
1700057G04Rik_sg1	1700057G04Rik	20.78/97.839	35.981/44.827	-0.54261
1700057G04Rik_sg2	1700057G04Rik	30.477/97.839	41.578/23.908	-0.94936
1700057G04Rik_sg3	1700057G04Rik	45.715/48.046	61.568/64.999	0.425
1700057G04Rik_sg4	1700057G04Rik	85.197/13.103	0/53.045	-0.86565
1700066B19Rik_sg1	1700066B19Rik	67.188/19.218	27.985/23.16	-0.73419
1700066B19Rik_sg2	1700066B19Rik	19.394/0	56.77/84.424	2.7427
1700066B19Rik_sg3	1700066B19Rik	55.413/14.851	13.593/20.172	-1.0147
1700066B19Rik_sg4	1700066B19Rik	21.472/21.839	66.365/47.815	1.3584
1700066M21Rik_sg1	1700066M21Rik	25.628/62.896	16.791/23.908	-1.0841
1700066M21Rik_sg2	1700066M21Rik	9.0045/34.069	39.979/73.217	1.3537
1700066M21Rik_sg3	1700066M21Rik	89.353/88.23	107.94/47.068	-0.19378
1700066M21Rik_sg4	1700066M21Rik	0/20.965	43.977/0	1.0014
1700067K01Rik_sg1	1700067K01Rik	39.481/43.678	31.184/136.72	0.99649
1700067K01Rik_sg2	1700067K01Rik	24.936/48.046	44.776/56.78	0.46582
1700067K01Rik_sg3	1700067K01Rik	80.348/62.896	82.357/221.14	1.0727
1700067K01Rik_sg4	1700067K01Rik	0/0	0/11.954	2.3736
1700067P10Rik_sg1	1700067P10Rik	209.18/325.84	159.92/150.17	-0.78304
1700067P10Rik_sg2	1700067P10Rik	24.936/11.356	32.783/16.436	0.41964
1700067P10Rik_sg3	1700067P10Rik	27.706/17.471	120.74/100.86	2.2447
1700067P10Rik_sg4	1700067P10Rik	6.2339/15.724	62.367/2.2413	1.4752
1700074P13Rik_sg1	1700074P13Rik	13.16/158.11	155.12/47.068	0.23682
1700074P13Rik_sg2	1700074P13Rik	105.28/105.7	40.778/13.448	-1.9214
1700074P13Rik_sg3	1700074P13Rik	18.702/23.586	257.46/59.769	2.8496
1700074P13Rik_sg4	1700074P13Rik	19.394/149.38	71.162/0	-1.2229
1700080O16Rik_sg1	1700080O16Rik	126.06/0	128.73/58.275	0.56158
1700080O16Rik_sg2	1700080O16Rik	31.862/42.804	82.357/19.425	0.43688
1700080O16Rik_sg3	1700080O16Rik	20.087/43.678	25.586/30.632	-0.17585
1700080O16Rik_sg4	1700080O16Rik	29.784/49.793	152.72/40.344	1.2577
1700088E04Rik_sg1	1700088E04Rik	52.642/12.23	87.154/113.56	1.6
1700088E04Rik_sg2	1700088E04Rik	11.775/96.965	29.584/0	-1.8099
1700088E04Rik_sg3	1700088E04Rik	4.8486/3.4942	4.7975/2.2413	-0.19443
1700088E04Rik_sg4	1700088E04Rik	69.958/94.344	197.5/52.298	0.59843
1700092M07Rik_sg1	1700092M07Rik	19.394/0	11.994/11.954	0.27836
1700092M07Rik_sg2	1700092M07Rik	40.174/193.93	6.3966/2.9884	-4.3742
1700092M07Rik_sg3	1700092M07Rik	72.729/50.666	0/44.08	-1.4443
1700092M07Rik_sg4	1700092M07Rik	30.477/14.851	17.591/47.815	0.5102
1700093K21Rik_sg1	1700093K21Rik	20.78/69.885	3.9979/1.4942	-3.6286
1700093K21Rik_sg2	1700093K21Rik	16.624/2.6207	35.981/16.436	1.357
1700093K21Rik_sg3	1700093K21Rik	62.339/29.701	146.32/71.723	1.2265
1700093K21Rik_sg4	1700093K21Rik	10.39/18.345	116.74/0	1.9498
1700102P08Rik_sg1	1700102P08Rik	195.33/45.425	131.13/121.03	0.066254
1700102P08Rik_sg2	1700102P08Rik	117.06/4.3678	41.578/11.954	-1.1523
1700102P08Rik_sg3	1700102P08Rik	79.656/17.471	34.382/20.172	-0.80965
1700102P08Rik_sg4	1700102P08Rik	105.28/42.804	75.16/42.585	-0.32584
1700109H08Rik_sg1	1700109H08Rik	13.853/11.356	0.79958/22.413	-0.10994
1700109H08Rik_sg2	1700109H08Rik	18.009/33.195	39.979/77.7	1.1695
1700109H08Rik_sg3	1700109H08Rik	63.724/21.839	25.586/5.9769	-1.3834
1700109H08Rik_sg4	1700109H08Rik	87.275/20.965	127.93/36.608	0.59523
1700113H08Rik_sg1	1700113H08Rik	49.871/32.322	53.572/24.655	-0.069624
1700113H08Rik_sg2	1700113H08Rik	0/0	0/0	-0.42903
1700113H08Rik_sg3	1700113H08Rik	77.578/104.83	53.572/62.757	-0.64007
1700113H08Rik_sg4	1700113H08Rik	20.087/27.08	36.781/123.27	1.7207
1700122O11Rik_sg1	1700122O11Rik	87.275/7.862	51.973/109.83	0.75383
1700122O11Rik_sg2	1700122O11Rik	99.05/13.977	50.373/110.57	0.50242
1700122O11Rik_sg3	1700122O11Rik	51.257/31.448	43.977/85.918	0.63887
1700122O11Rik_sg4	1700122O11Rik	149.61/15.724	15.192/23.908	-2.0256
1700123K08Rik_sg1	1700123K08Rik	72.729/46.299	10.395/14.942	-2.1464
1700123K08Rik_sg2	1700123K08Rik	131.6/56.781	64.766/41.091	-0.81981
1700123K08Rik_sg3	1700123K08Rik	51.949/138.02	11.994/6.724	-3.212
1700123K08Rik_sg4	1700123K08Rik	94.201/32.322	55.97/65.746	-0.054993
1700123O20Rik_sg1	1700123O20Rik	22.165/13.103	45.576/5.2298	0.50274
1700123O20Rik_sg2	1700123O20Rik	116.37/92.597	32.783/74.711	-0.94615
1700123O20Rik_sg3	1700123O20Rik	38.789/69.885	43.177/41.838	-0.34697
1700123O20Rik_sg4	1700123O20Rik	38.096/75.126	10.395/73.217	-0.42855
1700125H20Rik_sg1	1700125H20Rik	68.573/134.53	51.173/130	-0.16315
1700125H20Rik_sg2	1700125H20Rik	20.087/32.322	16.791/29.884	-0.16064
1700125H20Rik_sg3	1700125H20Rik	108.05/31.448	92.751/23.908	-0.25401
1700125H20Rik_sg4	1700125H20Rik	24.936/181.7	24.787/20.919	-2.1287
1700129C05Rik_sg1	1700129C05Rik	26.321/3.4942	46.376/24.655	1.1988
1700129C05Rik_sg2	1700129C05Rik	63.032/36.69	1.5992/76.205	-0.35008
1700129C05Rik_sg3	1700129C05Rik	60.954/40.184	352.61/44.08	1.9507
1700129C05Rik_sg4	1700129C05Rik	86.582/109.19	123.93/173.33	0.59754
1810009A15Rik_sg1	1810009A15Rik	2.7706/21.839	0/38.103	0.59175
1810009A15Rik_sg2	1810009A15Rik	4.1559/6.9885	25.586/0	1.0695
1810009A15Rik_sg3	1810009A15Rik	9.6972/16.598	7.1962/87.412	1.7716
1810009A15Rik_sg4	1810009A15Rik	18.009/32.322	0/0	-4.7096
1810009J06Rik_sg1	1810009J06Rik	1.3853/0	0/21.666	2.8055
1810009J06Rik_sg2	1810009J06Rik	27.014/45.425	40.778/33.62	0.03749
1810009J06Rik_sg3	1810009J06Rik	123.29/33.195	0/11.207	-3.585
1810009J06Rik_sg4	1810009J06Rik	76.192/60.276	63.167/74.711	0.014614
1810013L24Rik_sg1	1810013L24Rik	0/0	0/0	-0.42903
1810013L24Rik_sg2	1810013L24Rik	18.009/116.18	73.561/25.402	-0.43182
1810013L24Rik_sg3	1810013L24Rik	0/0	0/0	-0.42903
1810013L24Rik_sg4	1810013L24Rik	1.3853/0	6.3966/0	1.3105
1810024B03Rik_sg1	1810024B03Rik	38.789/59.402	55.171/31.379	-0.17819
1810024B03Rik_sg2	1810024B03Rik	23.55/102.21	37.58/138.96	0.48287
1810024B03Rik_sg3	1810024B03Rik	33.248/180.83	11.994/5.9769	-3.4356
1810024B03Rik_sg4	1810024B03Rik	39.481/2.6207	131.13/8.9653	1.6879
1810030O07Rik_sg1	1810030O07Rik	69.266/53.287	62.367/79.941	0.21239
1810030O07Rik_sg2	1810030O07Rik	29.784/82.988	35.181/15.689	-1.1182
1810030O07Rik_sg3	1810030O07Rik	56.798/98.712	75.96/0	-1.0146
1810030O07Rik_sg4	1810030O07Rik	13.16/13.103	111.14/84.424	2.8053
1810037I17Rik_sg1	1810037I17Rik	17.316/0	7.9958/8.2182	-0.084781
1810037I17Rik_sg2	1810037I17Rik	14.546/138.02	1.5992/13.448	-3.1806
1810037I17Rik_sg3	1810037I17Rik	6.2339/48.919	58.369/26.149	0.59817
1810037I17Rik_sg4	1810037I17Rik	2.078/0	17.591/11.207	2.9169
1810046K07Rik_sg1	1810046K07Rik	24.936/33.195	111.14/94.883	1.7906
1810046K07Rik_sg2	1810046K07Rik	118.44/65.517	20.789/43.332	-1.4918
1810046K07Rik_sg3	1810046K07Rik	103.21/48.919	116.74/26.896	-0.081753
1810046K07Rik_sg4	1810046K07Rik	29.092/138.9	58.369/76.952	-0.30787
1810055G02Rik_sg1	1810055G02Rik	17.316/12.23	19.19/64.252	1.4375
1810055G02Rik_sg2	1810055G02Rik	16.624/55.034	101.55/51.551	1.0743
1810055G02Rik_sg3	1810055G02Rik	25.628/13.977	21.589/41.091	0.63655
1810055G02Rik_sg4	1810055G02Rik	25.628/0	45.576/0	0.78408
1810062G17Rik_sg1	1810062G17Rik	27.706/30.575	41.578/35.861	0.39815
1810062G17Rik_sg2	1810062G17Rik	148.23/59.402	218.28/183.04	0.9441
1810062G17Rik_sg3	1810062G17Rik	13.16/20.965	126.33/103.85	2.6841
1810062G17Rik_sg4	1810062G17Rik	173.16/42.804	45.576/61.263	-1.0019
1810065E05Rik_sg1	1810065E05Rik	43.637/185.19	75.16/132.99	-0.13545
1810065E05Rik_sg2	1810065E05Rik	42.252/106.57	55.97/62.757	-0.32113
1810065E05Rik_sg3	1810065E05Rik	46.408/135.4	64.766/87.412	-0.25362
1810065E05Rik_sg4	1810065E05Rik	60.261/162.48	45.576/0	-2.24
2010003K11Rik_sg1	2010003K11Rik	37.404/29.701	64.766/62.01	0.89801
2010003K11Rik_sg2	2010003K11Rik	3.4633/0	139.13/41.091	5.0597
2010003K11Rik_sg3	2010003K11Rik	65.11/10.483	14.392/5.2298	-1.8434
2010003K11Rik_sg4	2010003K11Rik	77.578/6.1149	111.14/0	0.40088
2010106E10Rik_sg1	2010106E10Rik	433.6/1501.6	1462.4/2044.8	0.85716
2010106E10Rik_sg2	2010106E10Rik	169.01/165.1	58.369/19.425	-2.0746
2010106E10Rik_sg3	2010106E10Rik	11.775/12.23	27.186/49.309	1.5938
2010106E10Rik_sg4	2010106E10Rik	69.958/168.6	51.973/28.39	-1.5463
2010109A12Rik_sg1	2010109A12Rik	169.01/1.7471	79.158/32.126	-0.60879
2010109A12Rik_sg2	2010109A12Rik	111.52/145.88	15.192/26.149	-2.5814
2010109A12Rik_sg3	2010109A12Rik	15.931/0	30.384/9.7124	1.2312
2010109A12Rik_sg4	2010109A12Rik	88.66/110.94	167.91/24.655	-0.051252
2010315B03Rik_sg1	2010315B03Rik	15.931/41.057	19.989/8.9653	-0.93027
2010315B03Rik_sg2	2010315B03Rik	2.078/61.149	0/0	-5.0274
2010315B03Rik_sg3	2010315B03Rik	39.481/84.735	31.184/13.448	-1.4365
2010315B03Rik_sg4	2010315B03Rik	55.413/27.08	105.54/166.61	1.6981
2200002D01Rik_sg1	2200002D01Rik	3.4633/1.7471	0.79958/12.701	1.1042
2200002D01Rik_sg2	2200002D01Rik	15.931/61.149	0/66.493	-0.20736
2200002D01Rik_sg3	2200002D01Rik	18.702/85.609	58.369/46.321	0.0051404
2200002D01Rik_sg4	2200002D01Rik	73.422/20.092	0/11.207	-2.8544
2200002J24Rik_sg1	2200002J24Rik	102.51/50.666	179.91/86.665	0.79136
2200002J24Rik_sg2	2200002J24Rik	22.165/25.333	63.966/41.091	1.1129
2200002J24Rik_sg3	2200002J24Rik	107.36/9.6092	55.97/0	-1.0372
2200002J24Rik_sg4	2200002J24Rik	80.348/11.356	68.764/11.954	-0.17993
2210010C04Rik_sg1	2210010C04Rik	218.88/54.161	189.5/56.78	-0.14767
2210010C04Rik_sg2	2210010C04Rik	130.91/48.919	19.989/133.73	-0.22363
2210010C04Rik_sg3	2210010C04Rik	28.399/0	210.29/14.942	2.9021
2210010C04Rik_sg4	2210010C04Rik	30.477/34.942	45.576/14.942	-0.10889
2210016F16Rik_sg1	2210016F16Rik	76.192/41.057	55.171/61.263	-0.0099018
2210016F16Rik_sg2	2210016F16Rik	159.31/204.41	101.55/14.942	-1.626
2210016F16Rik_sg3	2210016F16Rik	36.711/18.345	47.175/106.09	1.4443
2210016F16Rik_sg4	2210016F16Rik	6.9266/27.08	0/80.688	1.1994
2210016L21Rik_sg1	2210016L21Rik	47.793/60.276	92.751/21.666	0.080897
2210016L21Rik_sg2	2210016L21Rik	3.4633/0	3.1983/0	-0.071726
2210016L21Rik_sg3	2210016L21Rik	18.009/85.609	0/127.01	0.28862
2210016L21Rik_sg4	2210016L21Rik	143.38/229.75	82.357/126.26	-0.83275
2210407C18Rik_sg1	2210407C18Rik	38.789/69.011	7.1962/18.678	-1.9779
2210407C18Rik_sg2	2210407C18Rik	20.78/8.7356	7.9958/0	-1.6567
2210407C18Rik_sg3	2210407C18Rik	78.963/91.724	198.3/0	0.21397
2210407C18Rik_sg4	2210407C18Rik	99.743/14.851	64.766/0	-0.8043
2210408I21Rik_sg1	2210408I21Rik	61.647/6.9885	0/36.608	-0.87147
2210408I21Rik_sg2	2210408I21Rik	2.7706/0	65.565/0	3.824
2210408I21Rik_sg3	2210408I21Rik	2.7706/37.563	3.9979/96.377	1.274
2210408I21Rik_sg4	2210408I21Rik	53.335/152	11.994/7.4711	-3.2719
2300002M23Rik_sg1	2300002M23Rik	56.798/122.3	51.173/60.516	-0.67166
2300002M23Rik_sg2	2300002M23Rik	29.784/79.494	45.576/35.114	-0.42838
2300002M23Rik_sg3	2300002M23Rik	76.885/6.1149	35.181/20.919	-0.54891
2300002M23Rik_sg4	2300002M23Rik	31.17/25.333	0/22.413	-1.2608
2300003K06Rik_sg1	2300003K06Rik	40.174/17.471	43.977/36.608	0.46947
2300003K06Rik_sg2	2300003K06Rik	112.21/126.67	83.156/21.666	-1.1731
2300003K06Rik_sg3	2300003K06Rik	133.68/84.735	147.92/108.33	0.22854
2300003K06Rik_sg4	2300003K06Rik	31.17/0	48.774/34.367	1.36
2300009A05Rik_sg1	2300009A05Rik	58.183/70.758	167.11/49.309	0.73819
2300009A05Rik_sg2	2300009A05Rik	57.491/76.873	93.551/132.99	0.74496
2300009A05Rik_sg3	2300009A05Rik	35.326/81.241	19.989/127.76	0.33681
2300009A05Rik_sg4	2300009A05Rik	99.743/107.45	23.987/49.309	-1.4742
2310002L09Rik_sg1	2310002L09Rik	6.2339/68.138	30.384/36.608	-0.1466
2310002L09Rik_sg2	2310002L09Rik	28.399/55.034	48.774/30.632	-0.069666
2310002L09Rik_sg3	2310002L09Rik	140.61/62.896	33.582/53.792	-1.2012
2310002L09Rik_sg4	2310002L09Rik	24.243/69.011	54.371/40.344	0.021961
2310009B15Rik_sg1	2310009B15Rik	12.468/59.402	22.388/34.367	-0.33027
2310009B15Rik_sg2	2310009B15Rik	60.954/21.839	7.9958/57.528	-0.32856
2310009B15Rik_sg3	2310009B15Rik	37.404/130.16	212.69/103.1	0.90624
2310009B15Rik_sg4	2310009B15Rik	4.1559/2.6207	77.559/34.367	3.6983
2310011J03Rik_sg1	2310011J03Rik	0/0	0/0	-0.42903
2310011J03Rik_sg2	2310011J03Rik	31.862/0	0/0	-4.0816
2310011J03Rik_sg3	2310011J03Rik	0/41.057	107.94/0	1.3524
2310011J03Rik_sg4	2310011J03Rik	9.6972/0	0/12.701	0.32974
2310022A10Rik_sg1	2310022A10Rik	0/0	0/0	-0.42903
2310022A10Rik_sg2	2310022A10Rik	60.954/85.609	95.949/111.32	0.49429
2310022A10Rik_sg3	2310022A10Rik	11.083/20.965	0/0	-4.0895
2310022A10Rik_sg4	2310022A10Rik	238.27/166.85	139.13/20.172	-1.3357
2310022B05Rik_sg1	2310022B05Rik	4.1559/24.46	43.177/67.24	1.8765
2310022B05Rik_sg2	2310022B05Rik	103.9/6.9885	64.766/23.908	-0.31613
2310022B05Rik_sg3	2310022B05Rik	105.98/19.218	16.791/94.136	-0.17165
2310022B05Rik_sg4	2310022B05Rik	0/45.425	0/9.7124	-2.0176
2310030G06Rik_sg1	2310030G06Rik	140.61/54.161	36.781/38.103	-1.3558
2310030G06Rik_sg2	2310030G06Rik	31.862/89.977	86.354/56.78	0.22893
2310030G06Rik_sg3	2310030G06Rik	45.715/0	57.57/26.896	0.85767
2310030G06Rik_sg4	2310030G06Rik	74.114/41.057	32.783/0	-1.7522
2310033P09Rik_sg1	2310033P09Rik	65.11/92.597	15.192/17.184	-2.216
2310033P09Rik_sg2	2310033P09Rik	55.413/88.23	46.376/5.9769	-1.422
2310033P09Rik_sg3	2310033P09Rik	151.69/133.65	76.759/56.033	-1.092
2310033P09Rik_sg4	2310033P09Rik	0/11.356	17.591/31.379	1.9321
2310034C09Rik_sg1	2310034C09Rik	92.123/13.977	75.96/25.402	-0.064671
2310034C09Rik_sg2	2310034C09Rik	38.789/31.448	69.563/41.838	0.65063
2310034C09Rik_sg3	2310034C09Rik	14.546/108.32	140.73/81.435	0.84414
2310034C09Rik_sg4	2310034C09Rik	0/3.4942	0/0	-1.4579
2310039H08Rik_sg1	2310039H08Rik	81.734/151.13	70.363/29.884	-1.1997
2310039H08Rik_sg2	2310039H08Rik	2.7706/50.666	32.783/50.804	0.62653
2310039H08Rik_sg3	2310039H08Rik	47.793/85.609	44.776/14.195	-1.151
2310039H08Rik_sg4	2310039H08Rik	0/13.103	0/26.896	0.936
2310050C09Rik_sg1	2310050C09Rik	18.702/20.092	19.989/104.6	1.6337
2310050C09Rik_sg2	2310050C09Rik	24.936/27.08	24.787/11.207	-0.50763
2310050C09Rik_sg3	2310050C09Rik	28.399/55.908	38.38/19.425	-0.52922
2310050C09Rik_sg4	2310050C09Rik	108.75/41.931	4.7975/53.045	-1.3513
2310057J18Rik_sg1	2310057J18Rik	23.55/185.19	3.9979/22.413	-2.891
2310057J18Rik_sg2	2310057J18Rik	95.587/27.08	91.951/11.207	-0.24552
2310057J18Rik_sg3	2310057J18Rik	25.628/37.563	13.593/33.62	-0.40565
2310057J18Rik_sg4	2310057J18Rik	81.734/105.7	24.787/18.678	-2.0589
2310057M21Rik_sg1	2310057M21Rik	4.1559/72.505	13.593/19.425	-1.1676
2310057M21Rik_sg2	2310057M21Rik	40.867/31.448	45.576/32.126	0.10096
2310057M21Rik_sg3	2310057M21Rik	36.018/31.448	0/23.908	-1.4229
2310057M21Rik_sg4	2310057M21Rik	32.555/16.598	33.582/108.33	1.4923
2310057N15Rik_sg1	2310057N15Rik	0/72.505	87.154/28.39	0.65779
2310057N15Rik_sg2	2310057N15Rik	109.44/12.23	115.14/69.481	0.59362
2310057N15Rik_sg3	2310057N15Rik	11.775/5.2414	141.53/28.39	3.1764
2310057N15Rik_sg4	2310057N15Rik	13.16/52.414	10.395/53.792	-0.029933
2310061I04Rik_sg1	2310061I04Rik	42.945/8.7356	7.9958/81.435	0.76829
2310061I04Rik_sg2	2310061I04Rik	108.75/92.597	73.561/20.919	-1.0756
2310061I04Rik_sg3	2310061I04Rik	21.472/17.471	15.192/20.172	-0.13199
2310061I04Rik_sg4	2310061I04Rik	30.477/0.87356	178.31/0	2.4347
2310061N02Rik_sg1	2310061N02Rik	77.578/20.965	18.39/50.056	-0.51321
2310061N02Rik_sg2	2310061N02Rik	45.715/76	69.563/36.608	-0.1937
2310061N02Rik_sg3	2310061N02Rik	20.087/6.1149	78.359/54.539	2.258
2310061N02Rik_sg4	2310061N02Rik	0/0	0/28.39	3.4965
2310079G19Rik_sg1	2310079G19Rik	18.702/58.529	83.956/70.976	0.98601
2310079G19Rik_sg2	2310079G19Rik	52.642/20.965	51.173/23.908	0.027839
2310079G19Rik_sg3	2310079G19Rik	44.33/34.942	31.184/128.5	0.99236
2310079G19Rik_sg4	2310079G19Rik	38.789/235.86	0/26.149	-3.2969
2410002F23Rik_sg1	2410002F23Rik	43.637/57.655	35.981/3.7356	-1.308
2410002F23Rik_sg2	2410002F23Rik	200.18/13.103	30.384/31.379	-1.7554
2410002F23Rik_sg3	2410002F23Rik	60.261/41.931	0.79958/80.688	-0.31961
2410002F23Rik_sg4	2410002F23Rik	45.715/10.483	26.386/70.976	0.77172
2410004B18Rik_sg1	2410004B18Rik	26.321/83.862	159.12/40.344	0.84464
2410004B18Rik_sg2	2410004B18Rik	63.724/0	183.9/0	1.5
2410004B18Rik_sg3	2410004B18Rik	23.55/22.713	4.7975/0	-2.8278
2410004B18Rik_sg4	2410004B18Rik	13.16/0	7.9958/19.425	0.95651
2410004P03Rik_sg1	2410004P03Rik	26.321/145.88	2.3987/0	-5.3076
2410004P03Rik_sg2	2410004P03Rik	90.738/36.69	92.751/62.757	0.28328
2410004P03Rik_sg3	2410004P03Rik	22.165/65.517	0/21.666	-1.922
2410004P03Rik_sg4	2410004P03Rik	6.9266/43.678	37.58/96.377	1.3699
2410137M14Rik_sg1	2410137M14Rik	15.238/0	65.565/73.217	3.0298
2410137M14Rik_sg2	2410137M14Rik	81.041/30.575	43.977/20.919	-0.76417
2410137M14Rik_sg3	2410137M14Rik	19.394/23.586	0/43.332	0.011243
2410137M14Rik_sg4	2410137M14Rik	90.738/4.3678	114.34/34.367	0.63411
2510002D24Rik_sg1	2510002D24Rik	29.092/87.356	80.757/48.562	0.14883
2510002D24Rik_sg2	2510002D24Rik	78.963/28.827	203.89/57.528	1.2626
2510002D24Rik_sg3	2510002D24Rik	56.798/8.7356	84.755/208.44	2.128
2510002D24Rik_sg4	2510002D24Rik	21.472/15.724	29.584/168.1	2.3489
2510009E07Rik_sg1	2510009E07Rik	12.468/48.919	9.5949/86.665	0.63241
2510009E07Rik_sg2	2510009E07Rik	87.275/108.32	69.563/89.653	-0.29356
2510009E07Rik_sg3	2510009E07Rik	39.481/123.17	71.162/141.2	0.38065
2510009E07Rik_sg4	2510009E07Rik	49.179/97.839	60.768/61.263	-0.26478
2510039O18Rik_sg1	2510039O18Rik	139.92/111.82	203.89/132.24	0.41427
2510039O18Rik_sg2	2510039O18Rik	36.711/24.46	38.38/129.25	1.4251
2510039O18Rik_sg3	2510039O18Rik	55.413/0.87356	18.39/11.207	-0.88337
2510039O18Rik_sg4	2510039O18Rik	108.05/103.95	7.1962/181.55	-0.16603
2610002M06Rik_sg1	2610002M06Rik	82.426/4.3678	88.753/62.01	0.78276
2610002M06Rik_sg2	2610002M06Rik	82.426/0	166.31/69.481	1.4939
2610002M06Rik_sg3	2610002M06Rik	63.724/61.149	39.179/103.1	0.18548
2610002M06Rik_sg4	2610002M06Rik	87.968/287.4	34.382/299.59	-0.16763
2610008E11Rik_sg1	2610008E11Rik	59.569/104.83	23.987/0	-2.6787
2610008E11Rik_sg2	2610008E11Rik	15.931/89.103	69.563/60.516	0.30333
2610008E11Rik_sg3	2610008E11Rik	189.79/27.954	51.173/17.931	-1.6278
2610008E11Rik_sg4	2610008E11Rik	70.651/23.586	69.563/113.56	0.94383
2610028H24Rik_sg1	2610028H24Rik	43.637/87.356	43.177/154.65	0.58741
2610028H24Rik_sg2	2610028H24Rik	10.39/16.598	112.74/24.655	2.2657
2610028H24Rik_sg3	2610028H24Rik	126.06/0	39.179/10.46	-1.3103
2610028H24Rik_sg4	2610028H24Rik	11.083/12.23	13.593/10.46	0.041573
2610301B20Rik_sg1	2610301B20Rik	74.807/137.15	16.791/19.425	-2.4851
2610301B20Rik_sg2	2610301B20Rik	47.793/84.735	86.354/91.148	0.41609
2610301B20Rik_sg3	2610301B20Rik	33.94/0	157.52/14.195	2.273
2610301B20Rik_sg4	2610301B20Rik	37.404/23.586	36.781/28.39	0.09272
2610318N02Rik_sg1	2610318N02Rik	147.54/7.862	16.791/29.884	-1.6931
2610318N02Rik_sg2	2610318N02Rik	72.036/46.299	27.985/26.896	-1.081
2610318N02Rik_sg3	2610318N02Rik	0.69266/0	10.395/5.2298	2.7105
2610318N02Rik_sg4	2610318N02Rik	414.9/82.115	195.1/76.952	-0.86465
2610507B11Rik_sg1	2610507B11Rik	0.69266/6.1149	0/0	-2.1387
2610507B11Rik_sg2	2610507B11Rik	2.078/0	66.365/156.15	5.7828
2610507B11Rik_sg3	2610507B11Rik	0.69266/12.23	0/5.9769	-0.90359
2610507B11Rik_sg4	2610507B11Rik	29.092/6.9885	7.9958/1.4942	-1.7287
2610524H06Rik_sg1	2610524H06Rik	0/0	0/0	-0.42903
2610524H06Rik_sg2	2610524H06Rik	5.5413/21.839	7.1962/51.551	1.048
2610524H06Rik_sg3	2610524H06Rik	85.89/105.7	0/0	-6.5969
2610524H06Rik_sg4	2610524H06Rik	68.573/6.1149	41.578/47.815	0.25309
2610528A11Rik_sg1	2610528A11Rik	11.083/23.586	0/0	-4.1965
2610528A11Rik_sg2	2610528A11Rik	85.89/0	59.968/71.723	0.60514
2610528A11Rik_sg3	2610528A11Rik	18.009/35.816	8.7954/94.883	0.9207
2610528A11Rik_sg4	2610528A11Rik	49.179/110.07	63.966/67.24	-0.27561
2610528J11Rik_sg1	2610528J11Rik	135.76/27.08	0.79958/8.2182	-3.9032
2610528J11Rik_sg2	2610528J11Rik	0/13.977	0.79958/5.2298	-0.99264
2610528J11Rik_sg3	2610528J11Rik	36.018/37.563	77.559/52.298	0.80287
2610528J11Rik_sg4	2610528J11Rik	25.628/6.1149	45.576/5.9769	0.66636
2700049A03Rik_sg1	2700049A03Rik	20.087/69.885	82.357/20.919	0.19491
2700049A03Rik_sg2	2700049A03Rik	18.009/0	11.994/89.653	2.373
2700049A03Rik_sg3	2700049A03Rik	71.344/26.207	19.989/1.4942	-2.0838
2700049A03Rik_sg4	2700049A03Rik	43.637/23.586	10.395/22.413	-0.99185
2700062C07Rik_sg1	2700062C07Rik	0/25.333	8.7954/5.2298	-0.77032
2700062C07Rik_sg2	2700062C07Rik	4.8486/11.356	17.591/0	0.10584
2700062C07Rik_sg3	2700062C07Rik	11.083/7.862	23.987/16.436	1.0183
2700062C07Rik_sg4	2700062C07Rik	2.078/22.713	0/0	-3.7437
2700081O15Rik_sg1	2700081O15Rik	86.582/16.598	26.386/20.172	-1.1151
2700081O15Rik_sg2	2700081O15Rik	144.77/87.356	19.989/78.447	-1.221
2700081O15Rik_sg3	2700081O15Rik	207.8/1045.7	1028.3/1143.1	0.79171
2700081O15Rik_sg4	2700081O15Rik	35.326/13.103	55.171/8.9653	0.39119
2700097O09Rik_sg1	2700097O09Rik	56.105/83.862	38.38/185.28	0.66862
2700097O09Rik_sg2	2700097O09Rik	33.94/10.483	45.576/42.585	0.95767
2700097O09Rik_sg3	2700097O09Rik	110.83/12.23	81.557/119.54	0.69959
2700097O09Rik_sg4	2700097O09Rik	103.9/0	51.173/0	-0.99392
2810004N23Rik_sg1	2810004N23Rik	106.67/13.977	27.186/0	-2.0712
2810004N23Rik_sg2	2810004N23Rik	38.096/1.7471	11.194/32.873	0.13874
2810004N23Rik_sg3	2810004N23Rik	1.3853/129.29	6.3966/33.62	-1.6588
2810004N23Rik_sg4	2810004N23Rik	0/0	6.3966/0	1.6408
2810006K23Rik_sg1	2810006K23Rik	68.573/15.724	39.979/46.321	0.033097
2810006K23Rik_sg2	2810006K23Rik	48.486/55.034	25.586/91.148	0.17021
2810006K23Rik_sg3	2810006K23Rik	119.83/163.36	179.91/24.655	-0.46534
2810006K23Rik_sg4	2810006K23Rik	99.05/138.9	15.992/174.82	-0.31549
2810021J22Rik_sg1	2810021J22Rik	13.853/0.87356	7.9958/70.976	2.2753
2810021J22Rik_sg2	2810021J22Rik	36.711/19.218	19.989/32.126	-0.098255
2810021J22Rik_sg3	2810021J22Rik	95.587/56.781	42.378/57.528	-0.59915
2810021J22Rik_sg4	2810021J22Rik	32.555/14.851	50.373/21.666	0.58363
2810408A11Rik_sg1	2810408A11Rik	84.504/83.862	59.169/75.458	-0.31839
2810408A11Rik_sg2	2810408A11Rik	3.4633/12.23	36.781/104.6	3.0185
2810408A11Rik_sg3	2810408A11Rik	145.46/69.885	118.34/45.574	-0.38956
2810408A11Rik_sg4	2810408A11Rik	25.628/11.356	27.186/85.918	1.562
2810459M11Rik_sg1	2810459M11Rik	47.793/0	11.194/0	-1.9161
2810459M11Rik_sg2	2810459M11Rik	47.793/140.64	86.354/28.39	-0.70595
2810459M11Rik_sg3	2810459M11Rik	64.417/12.23	18.39/9.7124	-1.3855
2810459M11Rik_sg4	2810459M11Rik	20.78/36.69	84.755/15.689	0.78463
2900026A02Rik_sg1	2900026A02Rik	23.55/16.598	56.77/16.436	0.83539
2900026A02Rik_sg2	2900026A02Rik	146.15/96.965	45.576/18.678	-1.8874
2900026A02Rik_sg3	2900026A02Rik	4.8486/149.38	44.776/99.366	-0.096275
2900026A02Rik_sg4	2900026A02Rik	21.472/21.839	47.175/14.942	0.50084
2900092C05Rik_sg1	2900092C05Rik	66.495/33.195	80.757/79.941	0.67802
2900092C05Rik_sg2	2900092C05Rik	13.16/0	128.73/8.2182	3.1962
2900092C05Rik_sg3	2900092C05Rik	117.75/52.414	43.977/23.908	-1.3008
2900092C05Rik_sg4	2900092C05Rik	319.32/19.218	73.561/103.1	-0.93056
3110001I22Rik_sg1	3110001I22Rik	27.014/3.4942	185.5/93.389	3.1111
3110001I22Rik_sg2	3110001I22Rik	67.188/60.276	28.785/8.9653	-1.7035
3110001I22Rik_sg3	3110001I22Rik	41.559/132.78	36.781/5.9769	-1.9782
3110001I22Rik_sg4	3110001I22Rik	148.23/136.28	152.72/38.85	-0.56571
3110009E18Rik_sg1	3110009E18Rik	47.101/53.287	93.551/5.2298	-0.02283
3110009E18Rik_sg2	3110009E18Rik	27.014/10.483	114.34/26.896	1.8586
3110009E18Rik_sg3	3110009E18Rik	36.018/239.36	41.578/39.597	-1.7376
3110009E18Rik_sg4	3110009E18Rik	54.027/29.701	103.95/59.769	0.95085
3110021N24Rik_sg1	3110021N24Rik	67.188/76	2.3987/23.908	-2.3587
3110021N24Rik_sg2	3110021N24Rik	2.7706/26.207	11.194/9.7124	-0.43546
3110021N24Rik_sg3	3110021N24Rik	192.56/19.218	164.71/35.861	-0.077656
3110021N24Rik_sg4	3110021N24Rik	91.431/45.425	51.173/34.367	-0.66557
3110040N11Rik_sg1	3110040N11Rik	59.569/5.2414	12.793/27.643	-0.65476
3110040N11Rik_sg2	3110040N11Rik	13.853/41.057	44.776/13.448	0.081653
3110040N11Rik_sg3	3110040N11Rik	90.738/133.65	53.572/50.056	-1.0998
3110040N11Rik_sg4	3110040N11Rik	27.706/14.851	7.9958/16.436	-0.75335
3110082I17Rik_sg1	3110082I17Rik	29.092/157.24	20.789/19.425	-2.1575
3110082I17Rik_sg2	3110082I17Rik	1.3853/3.4942	15.992/12.701	2.1575
3110082I17Rik_sg3	3110082I17Rik	63.032/138.02	15.992/67.987	-1.2398
3110082I17Rik_sg4	3110082I17Rik	24.243/0	0/22.413	-0.10426
3110082J24Rik_sg1	3110082J24Rik	40.174/11.356	24.787/6.724	-0.67573
3110082J24Rik_sg2	3110082J24Rik	95.587/152	28.785/91.148	-1.0335
3110082J24Rik_sg3	3110082J24Rik	11.083/47.172	27.186/17.184	-0.37791
3110082J24Rik_sg4	3110082J24Rik	20.78/8.7356	16.791/31.379	0.67077
3300002I08Rik_sg1	3300002I08Rik	3.4633/1.7471	0/5.9769	0.14575
3300002I08Rik_sg2	3300002I08Rik	0/0	0/9.7124	2.1209
3300002I08Rik_sg3	3300002I08Rik	26.321/0	48.774/51.551	1.8532
3300002I08Rik_sg4	3300002I08Rik	60.261/117.06	78.359/44.827	-0.51846
3425401B19Rik_sg1	3425401B19Rik	13.853/153.75	0/43.332	-1.9035
3425401B19Rik_sg2	3425401B19Rik	97.665/26.207	23.188/0	-2.3212
3425401B19Rik_sg3	3425401B19Rik	52.642/4.3678	0.79958/50.804	-0.13864
3425401B19Rik_sg4	3425401B19Rik	20.78/57.655	107.94/32.126	0.8207
3830403N18Rik_sg1	3830403N18Rik	31.17/22.713	12.793/0	-1.9174
3830403N18Rik_sg2	3830403N18Rik	35.326/60.276	69.563/88.159	0.7106
3830403N18Rik_sg3	3830403N18Rik	17.316/0	41.578/71.723	2.5775
3830403N18Rik_sg4	3830403N18Rik	4.1559/10.483	31.184/35.114	2.0373
3830406C13Rik_sg1	3830406C13Rik	85.89/22.713	144.72/115.06	1.243
3830406C13Rik_sg2	3830406C13Rik	36.018/23.586	79.158/106.09	1.6038
3830406C13Rik_sg3	3830406C13Rik	104.59/89.977	28.785/4.4827	-2.4786
3830406C13Rik_sg4	3830406C13Rik	62.339/229.75	72.762/0	-1.9759
3830417A13Rik_sg1	3830417A13Rik	36.018/43.678	9.5949/79.194	0.15224
3830417A13Rik_sg2	3830417A13Rik	31.862/13.977	51.973/9.7124	0.41276
3830417A13Rik_sg3	3830417A13Rik	45.023/30.575	105.54/22.413	0.74396
3830417A13Rik_sg4	3830417A13Rik	35.326/7.862	53.572/41.838	1.1081
4430402I18Rik_sg1	4430402I18Rik	116.37/129.29	39.179/73.217	-1.1143
4430402I18Rik_sg2	4430402I18Rik	11.083/0	139.93/76.952	4.0644
4430402I18Rik_sg3	4430402I18Rik	72.036/60.276	71.962/35.114	-0.30025
4430402I18Rik_sg4	4430402I18Rik	24.243/9.6092	13.593/76.205	1.3564
4833420G17Rik_sg1	4833420G17Rik	14.546/163.36	18.39/121.78	-0.3396
4833420G17Rik_sg2	4833420G17Rik	273.6/34.069	143.12/29.884	-0.8233
4833420G17Rik_sg3	4833420G17Rik	35.326/71.632	239.87/23.908	1.2865
4833420G17Rik_sg4	4833420G17Rik	277.76/118.8	55.171/79.941	-1.5394
4833439L19Rik_sg1	4833439L19Rik	346.33/1812.6	1376.9/1191.6	0.25038
4833439L19Rik_sg2	4833439L19Rik	80.348/0	115.14/36.608	0.90075
4833439L19Rik_sg3	4833439L19Rik	78.963/55.034	96.749/40.344	0.032472
4833439L19Rik_sg4	4833439L19Rik	67.188/290.02	123.93/23.16	-1.2686
4921504E06Rik_sg1	4921504E06Rik	97.665/19.218	40.778/33.62	-0.63793
4921504E06Rik_sg2	4921504E06Rik	29.092/21.839	20.789/22.413	-0.2277
4921504E06Rik_sg3	4921504E06Rik	42.252/0	0/0	-4.4677
4921504E06Rik_sg4	4921504E06Rik	12.468/23.586	8.7954/117.3	1.7511
4921507P07Rik_sg1	4921507P07Rik	243.82/0	97.549/27.643	-0.95057
4921507P07Rik_sg2	4921507P07Rik	69.958/109.19	97.549/18.678	-0.61566
4921507P07Rik_sg3	4921507P07Rik	40.867/0	0/0	-4.4218
4921507P07Rik_sg4	4921507P07Rik	54.027/0	71.962/41.091	1.0381
4921509C19Rik_sg1	4921509C19Rik	38.096/28.827	38.38/46.321	0.33104
4921509C19Rik_sg2	4921509C19Rik	22.858/17.471	0/4.4827	-2.707
4921509C19Rik_sg3	4921509C19Rik	19.394/41.057	43.177/17.931	0.015079
4921509C19Rik_sg4	4921509C19Rik	74.807/32.322	15.192/44.08	-0.83274
4921517D22Rik_sg1	4921517D22Rik	113.6/18.345	24.787/57.528	-0.66774
4921517D22Rik_sg2	4921517D22Rik	14.546/22.713	25.586/19.425	0.26001
4921517D22Rik_sg3	4921517D22Rik	8.3119/11.356	39.179/0	0.92634
4921517D22Rik_sg4	4921517D22Rik	28.399/116.18	29.584/144.94	0.26815
4921524J17Rik_sg1	4921524J17Rik	6.2339/33.195	11.994/68.734	0.99773
4921524J17Rik_sg2	4921524J17Rik	60.261/49.793	0/66.493	-0.71017
4921524J17Rik_sg3	4921524J17Rik	21.472/43.678	7.9958/64.252	0.14494
4921524J17Rik_sg4	4921524J17Rik	0/0	0/0	-0.42903
4921524L21Rik_sg1	4921524L21Rik	30.477/0	191.1/17.184	2.6948
4921524L21Rik_sg2	4921524L21Rik	34.633/156.37	121.54/190.51	0.70239
4921524L21Rik_sg3	4921524L21Rik	29.784/0	19.19/35.114	0.82493
4921524L21Rik_sg4	4921524L21Rik	8.3119/20.965	99.947/0	1.7046
4921536K21Rik_sg1	4921536K21Rik	113.6/6.9885	39.979/34.367	-0.68315
4921536K21Rik_sg2	4921536K21Rik	121.22/76.873	64.766/166.61	0.22199
4921536K21Rik_sg3	4921536K21Rik	76.885/89.977	201.49/15.689	0.37629
4921536K21Rik_sg4	4921536K21Rik	21.472/121.42	15.992/38.85	-1.35
4921539E11Rik_sg1	4921539E11Rik	134.38/16.598	50.373/0	-1.5464
4921539E11Rik_sg2	4921539E11Rik	105.98/76.873	9.5949/11.954	-2.9726
4921539E11Rik_sg3	4921539E11Rik	11.083/18.345	138.33/1.4942	2.174
4921539E11Rik_sg4	4921539E11Rik	86.582/73.379	111.94/85.171	0.29793
4930402F06Rik_sg1	4930402F06Rik	41.559/144.14	59.169/0	-1.6175
4930402F06Rik_sg2	4930402F06Rik	152.38/55.908	146.32/22.413	-0.30063
4930402F06Rik_sg3	4930402F06Rik	147.54/15.724	151.12/99.366	0.61146
4930402F06Rik_sg4	4930402F06Rik	4.8486/30.575	0/38.85	0.1264
4930402H24Rik_sg1	4930402H24Rik	0/114.44	48.774/57.528	-0.10448
4930402H24Rik_sg2	4930402H24Rik	51.257/117.93	47.175/112.81	-0.07968
4930402H24Rik_sg3	4930402H24Rik	26.321/60.276	4.7975/58.275	-0.44521
4930402H24Rik_sg4	4930402H24Rik	25.628/89.103	17.591/23.16	-1.4492
4930402K13Rik_sg1	4930402K13Rik	44.33/21.839	136.73/55.286	1.509
4930402K13Rik_sg2	4930402K13Rik	71.344/0	33.582/11.954	-0.62565
4930402K13Rik_sg3	4930402K13Rik	7.6192/0	38.38/0	2.0696
4930402K13Rik_sg4	4930402K13Rik	51.257/106.57	87.154/25.402	-0.4805
4930404N11Rik_sg1	4930404N11Rik	5.5413/4.3678	31.983/15.689	2.0604
4930404N11Rik_sg2	4930404N11Rik	94.201/41.931	138.33/5.2298	0.075531
4930404N11Rik_sg3	4930404N11Rik	11.083/11.356	25.586/42.585	1.5217
4930404N11Rik_sg4	4930404N11Rik	81.734/201.79	83.156/102.35	-0.60665
4930407I10Rik_sg1	4930407I10Rik	7.6192/32.322	107.14/68.734	2.0845
4930407I10Rik_sg2	4930407I10Rik	14.546/29.701	52.772/74.711	1.4853
4930407I10Rik_sg3	4930407I10Rik	4.8486/117.93	70.363/58.275	0.066192
4930407I10Rik_sg4	4930407I10Rik	21.472/72.505	20.789/44.08	-0.52137
4930415L06Rik_sg1	4930415L06Rik	81.041/84.735	51.973/34.367	-0.9254
4930415L06Rik_sg2	4930415L06Rik	74.807/24.46	59.169/69.481	0.36755
4930415L06Rik_sg3	4930415L06Rik	15.931/0	15.992/90.4	2.5957
4930415L06Rik_sg4	4930415L06Rik	29.092/9.6092	88.753/48.562	1.7752
4930415O20Rik_sg1	4930415O20Rik	70.651/124.92	16.791/38.85	-1.7772
4930415O20Rik_sg2	4930415O20Rik	137.15/55.908	50.373/38.103	-1.1083
4930415O20Rik_sg3	4930415O20Rik	62.339/10.483	65.565/0.74711	-0.13131
4930415O20Rik_sg4	4930415O20Rik	40.174/0	8.7954/11.207	-0.93872
4930430F08Rik_sg1	4930430F08Rik	25.628/28.827	9.5949/27.643	-0.52487
4930430F08Rik_sg2	4930430F08Rik	19.394/317.1	107.14/155.4	-0.35564
4930430F08Rik_sg3	4930430F08Rik	17.316/25.333	0/28.39	-0.55504
4930430F08Rik_sg4	4930430F08Rik	94.201/104.83	90.352/24.655	-0.78081
4930432K21Rik_sg1	4930432K21Rik	42.945/29.701	11.194/29.137	-0.81833
4930432K21Rik_sg2	4930432K21Rik	83.812/82.988	0/14.942	-3.3166
4930432K21Rik_sg3	4930432K21Rik	23.55/0	97.549/30.632	2.3491
4930432K21Rik_sg4	4930432K21Rik	65.802/203.54	160.72/195	0.39868
4930433I11Rik_sg1	4930433I11Rik	34.633/60.276	144.72/7.4711	0.67006
4930433I11Rik_sg2	4930433I11Rik	259.05/84.735	4.7975/64.999	-2.2679
4930433I11Rik_sg3	4930433I11Rik	65.11/81.241	70.363/82.182	0.059014
4930433I11Rik_sg4	4930433I11Rik	123.29/2.6207	35.181/22.413	-1.1019
4930444G20Rik_sg1	4930444G20Rik	8.3119/9.6092	41.578/0	1.1293
4930444G20Rik_sg2	4930444G20Rik	70.651/17.471	30.384/17.184	-0.86249
4930444G20Rik_sg3	4930444G20Rik	24.243/15.724	0/0	-4.3912
4930444G20Rik_sg4	4930444G20Rik	0/0	0/0	-0.42903
4930447A16Rik_sg1	4930447A16Rik	31.862/23.586	43.977/17.184	0.13675
4930447A16Rik_sg2	4930447A16Rik	12.468/131.91	55.171/48.562	-0.46925
4930447A16Rik_sg3	4930447A16Rik	27.014/0	39.979/35.114	1.4099
4930447A16Rik_sg4	4930447A16Rik	27.014/170.34	35.181/53.045	-1.1437
4930447C04Rik_sg1	4930447C04Rik	29.092/106.57	63.167/74.711	0.022995
4930447C04Rik_sg2	4930447C04Rik	118.44/138.02	14.392/64.252	-1.6803
4930447C04Rik_sg3	4930447C04Rik	28.399/27.954	0/46.321	-0.27216
4930447C04Rik_sg4	4930447C04Rik	183.55/42.804	123.14/117.3	0.086275
4930449I24Rik_sg1	4930449I24Rik	108.05/24.46	0/0	-6.0716
4930449I24Rik_sg2	4930449I24Rik	2.078/18.345	7.9958/28.39	0.77562
4930449I24Rik_sg3	4930449I24Rik	12.468/27.08	0/173.33	2.0772
4930449I24Rik_sg4	4930449I24Rik	66.495/53.287	9.5949/22.413	-1.8403
4930451I11Rik_sg1	4930451I11Rik	97.665/63.77	28.785/117.3	-0.14232
4930451I11Rik_sg2	4930451I11Rik	10.39/21.839	15.992/23.16	0.26575
4930451I11Rik_sg3	4930451I11Rik	22.858/101.33	8.7954/33.62	-1.5065
4930451I11Rik_sg4	4930451I11Rik	13.16/19.218	27.186/9.7124	0.17818
4930453N24Rik_sg1	4930453N24Rik	30.477/32.322	21.589/9.7124	-0.9604
4930453N24Rik_sg2	4930453N24Rik	38.789/50.666	13.593/0	-2.5522
4930453N24Rik_sg3	4930453N24Rik	151/23.586	22.388/36.608	-1.5336
4930453N24Rik_sg4	4930453N24Rik	45.715/62.896	23.987/35.114	-0.85622
4930467E23Rik_sg1	4930467E23Rik	31.862/0	6.3966/0	-2.0118
4930467E23Rik_sg2	4930467E23Rik	1.3853/0	0/93.389	4.8165
4930467E23Rik_sg3	4930467E23Rik	8.3119/13.103	0/82.182	1.8461
4930467E23Rik_sg4	4930467E23Rik	63.724/178.21	0/29.884	-2.9355
4930474N05Rik_sg1	4930474N05Rik	22.858/77.747	15.192/71.723	-0.2066
4930474N05Rik_sg2	4930474N05Rik	105.98/205.29	97.549/32.126	-1.2504
4930474N05Rik_sg3	4930474N05Rik	81.041/0	14.392/40.344	-0.54955
4930474N05Rik_sg4	4930474N05Rik	2.7706/29.701	25.586/65.746	1.437
4930480E11Rik_sg1	4930480E11Rik	15.931/32.322	0/10.46	-2.012
4930480E11Rik_sg2	4930480E11Rik	13.853/43.678	0/47.068	-0.27886
4930480E11Rik_sg3	4930480E11Rik	65.11/187.82	171.91/44.08	-0.22582
4930480E11Rik_sg4	4930480E11Rik	79.656/126.67	0/154.65	-0.41125
4930486L24Rik_sg1	4930486L24Rik	21.472/10.483	73.561/89.653	2.2826
4930486L24Rik_sg2	4930486L24Rik	30.477/36.69	72.762/62.757	0.99149
4930486L24Rik_sg3	4930486L24Rik	98.357/180.83	254.27/127.01	0.44686
4930486L24Rik_sg4	4930486L24Rik	0/0	27.186/14.195	4.01
4930503B20Rik_sg1	4930503B20Rik	135.76/32.322	24.787/29.137	-1.6047
4930503B20Rik_sg2	4930503B20Rik	9.6972/0	22.388/0	1.06
4930503B20Rik_sg3	4930503B20Rik	36.711/12.23	4.7975/16.436	-1.1326
4930503B20Rik_sg4	4930503B20Rik	49.871/8.7356	11.994/0	-2.1147
4930503E14Rik_sg1	4930503E14Rik	6.2339/0	0/0	-2.0416
4930503E14Rik_sg2	4930503E14Rik	32.555/0	0/58.275	0.80266
4930503E14Rik_sg3	4930503E14Rik	20.087/151.13	107.94/14.942	-0.47194
4930503E14Rik_sg4	4930503E14Rik	0/10.483	0/0	-2.6419
4930503L19Rik_sg1	4930503L19Rik	110.83/0	7.1962/3.7356	-3.1251
4930503L19Rik_sg2	4930503L19Rik	21.472/2.6207	19.19/10.46	0.27851
4930503L19Rik_sg3	4930503L19Rik	43.637/46.299	7.9958/131.49	0.62197
4930503L19Rik_sg4	4930503L19Rik	19.394/67.264	46.376/115.06	0.88235
4930505A04Rik_sg1	4930505A04Rik	98.357/52.414	2.3987/14.942	-2.9816
4930505A04Rik_sg2	4930505A04Rik	62.339/13.977	35.181/11.954	-0.67255
4930505A04Rik_sg3	4930505A04Rik	35.326/55.908	41.578/103.85	0.66108
4930505A04Rik_sg4	4930505A04Rik	36.018/94.344	195.1/114.31	1.2343
4930513O06Rik_sg1	4930513O06Rik	30.477/112.69	188.7/37.356	0.65168
4930513O06Rik_sg2	4930513O06Rik	36.711/59.402	7.9958/121.03	0.41736
4930513O06Rik_sg3	4930513O06Rik	122.6/34.942	179.91/52.298	0.55382
4930513O06Rik_sg4	4930513O06Rik	97.665/90.85	48.774/34.367	-1.162
4930519G04Rik_sg1	4930519G04Rik	160/241.98	61.568/62.757	-1.6771
4930519G04Rik_sg2	4930519G04Rik	104.59/15.724	135.13/49.309	0.60809
4930519G04Rik_sg3	4930519G04Rik	64.417/34.069	0/11.207	-2.9277
4930519G04Rik_sg4	4930519G04Rik	220.27/30.575	35.181/47.815	-1.5727
4930522H14Rik_sg1	4930522H14Rik	65.802/26.207	75.16/76.952	0.71311
4930522H14Rik_sg2	4930522H14Rik	166.24/48.046	172.71/82.929	0.25242
4930522H14Rik_sg3	4930522H14Rik	65.802/164.23	70.363/51.551	-0.90499
4930522H14Rik_sg4	4930522H14Rik	42.252/27.08	72.762/50.804	0.81581
4930523C07Rik_sg1	4930523C07Rik	45.023/16.598	113.54/8.2182	0.95996
4930523C07Rik_sg2	4930523C07Rik	49.179/8.7356	160.72/19.425	1.6041
4930523C07Rik_sg3	4930523C07Rik	67.188/59.402	87.954/44.827	0.067832
4930523C07Rik_sg4	4930523C07Rik	20.087/138.02	13.593/2.9884	-3.1071
4930524B15Rik_sg1	4930524B15Rik	85.197/134.53	63.167/139.71	-0.11402
4930524B15Rik_sg2	4930524B15Rik	25.628/189.56	62.367/32.126	-1.1705
4930524B15Rik_sg3	4930524B15Rik	11.083/30.575	52.772/25.402	0.87692
4930524B15Rik_sg4	4930524B15Rik	29.784/147.63	19.989/40.344	-1.5252
4930544D05Rik_sg1	4930544D05Rik	1.3853/20.092	64.766/69.481	2.5369
4930544D05Rik_sg2	4930544D05Rik	66.495/6.1149	67.165/63.504	0.83039
4930544D05Rik_sg3	4930544D05Rik	90.045/45.425	94.35/4.4827	-0.44716
4930544D05Rik_sg4	4930544D05Rik	43.637/33.195	34.382/0	-1.1156
4930544G11Rik_sg1	4930544G11Rik	72.729/4.3678	39.179/31.379	-0.12449
4930544G11Rik_sg2	4930544G11Rik	43.637/19.218	11.194/127.76	1.1199
4930544G11Rik_sg3	4930544G11Rik	94.894/138.9	38.38/64.252	-1.1722
4930544G11Rik_sg4	4930544G11Rik	116.37/44.552	131.93/203.21	1.0492
4930548H24Rik_sg1	4930548H24Rik	29.784/2.6207	45.576/11.207	0.77277
4930548H24Rik_sg2	4930548H24Rik	19.394/111.82	147.12/69.481	0.71461
4930548H24Rik_sg3	4930548H24Rik	237.58/24.46	125.53/48.562	-0.5844
4930548H24Rik_sg4	4930548H24Rik	51.949/70.758	111.14/3.7356	-0.09356
4930550C14Rik_sg1	4930550C14Rik	19.394/0	31.184/33.62	1.6427
4930550C14Rik_sg2	4930550C14Rik	4.8486/89.103	0/47.815	-0.94572
4930550C14Rik_sg3	4930550C14Rik	45.715/31.448	20.789/76.205	0.32251
4930550C14Rik_sg4	4930550C14Rik	69.266/171.22	129.53/122.53	0.067271
4930550L24Rik_sg1	4930550L24Rik	11.083/58.529	209.49/159.88	2.3746
4930550L24Rik_sg2	4930550L24Rik	25.628/55.034	40.778/7.4711	-0.71812
4930550L24Rik_sg3	4930550L24Rik	72.036/27.954	33.582/64.252	-0.030831
4930550L24Rik_sg4	4930550L24Rik	35.326/34.069	43.977/57.528	0.53581
4930555G01Rik_sg1	4930555G01Rik	0/0	21.589/5.2298	3.4199
4930555G01Rik_sg2	4930555G01Rik	5.5413/111.82	70.363/63.504	0.18692
4930555G01Rik_sg3	4930555G01Rik	4.1559/172.96	5.597/174.82	0.026339
4930555G01Rik_sg4	4930555G01Rik	0/11.356	109.54/0	3.062
4930558K02Rik_sg1	4930558K02Rik	15.931/6.9885	79.958/56.78	2.477
4930558K02Rik_sg2	4930558K02Rik	11.083/13.103	0/0	-3.7107
4930558K02Rik_sg3	4930558K02Rik	180.78/124.92	61.568/27.643	-1.7543
4930558K02Rik_sg4	4930558K02Rik	112.9/0	59.968/0	-0.89082
4930562C15Rik_sg1	4930562C15Rik	0/13.103	21.589/0	0.64322
4930562C15Rik_sg2	4930562C15Rik	32.555/13.103	73.561/23.16	1.0506
4930562C15Rik_sg3	4930562C15Rik	26.321/20.965	17.591/44.827	0.38626
4930562C15Rik_sg4	4930562C15Rik	7.6192/11.356	88.753/26.149	2.4785
4930563M21Rik_sg1	4930563M21Rik	20.78/20.965	36.781/2.9884	-0.06669
4930563M21Rik_sg2	4930563M21Rik	31.17/3.4942	20.789/76.205	1.433
4930563M21Rik_sg3	4930563M21Rik	90.045/8.7356	200.69/145.69	1.7894
4930563M21Rik_sg4	4930563M21Rik	54.72/82.988	52.772/3.7356	-1.2557
4930564D02Rik_sg1	4930564D02Rik	84.504/72.505	138.33/72.47	0.42036
4930564D02Rik_sg2	4930564D02Rik	69.958/11.356	40.778/0	-0.96169
4930564D02Rik_sg3	4930564D02Rik	13.853/93.471	24.787/74.711	-0.10716
4930564D02Rik_sg4	4930564D02Rik	45.023/3.4942	25.586/166.61	1.9426
4930567H17Rik_sg1	4930567H17Rik	43.637/7.862	48.774/21.666	0.43727
4930567H17Rik_sg2	4930567H17Rik	21.472/5.2414	8.7954/64.999	1.4003
4930567H17Rik_sg3	4930567H17Rik	15.238/0	54.371/0	1.7093
4930567H17Rik_sg4	4930567H17Rik	43.637/52.414	55.97/0	-0.75821
4930568D16Rik_sg1	4930568D16Rik	113.6/193.06	122.34/101.61	-0.45003
4930568D16Rik_sg2	4930568D16Rik	76.192/23.586	131.93/277.18	2.0141
4930568D16Rik_sg3	4930568D16Rik	102.51/14.851	21.589/75.458	-0.26918
4930568D16Rik_sg4	4930568D16Rik	5.5413/0	155.12/22.413	4.5733
4930571K23Rik_sg1	4930571K23Rik	117.06/21.839	5.597/37.356	-1.6482
4930571K23Rik_sg2	4930571K23Rik	243.82/131.91	15.192/125.51	-1.4043
4930571K23Rik_sg3	4930571K23Rik	10.39/28.827	44.776/167.35	2.3772
4930571K23Rik_sg4	4930571K23Rik	34.633/23.586	100.75/245.05	2.53
4930578I06Rik_sg1	4930578I06Rik	118.44/276.04	64.766/35.861	-1.9499
4930578I06Rik_sg2	4930578I06Rik	18.702/180.83	60.768/44.827	-0.90538
4930578I06Rik_sg3	4930578I06Rik	49.179/55.034	39.179/66.493	0.019686
4930578I06Rik_sg4	4930578I06Rik	18.009/19.218	0/7.4711	-2.0503
4930579F01Rik_sg1	4930579F01Rik	74.114/112.69	23.987/2.9884	-2.704
4930579F01Rik_sg2	4930579F01Rik	76.885/44.552	115.14/54.539	0.47594
4930579F01Rik_sg3	4930579F01Rik	6.2339/4.3678	19.19/36.608	2.1974
4930579F01Rik_sg4	4930579F01Rik	70.651/116.18	38.38/70.976	-0.76195
4930579G24Rik_sg1	4930579G24Rik	212.65/36.69	95.15/24.655	-1.045
4930579G24Rik_sg2	4930579G24Rik	63.032/21.839	8.7954/53.792	-0.42762
4930579G24Rik_sg3	4930579G24Rik	27.014/37.563	44.776/90.4	1.0429
4930579G24Rik_sg4	4930579G24Rik	11.083/23.586	134.33/0	1.8945
4930590J08Rik_sg1	4930590J08Rik	76.885/34.942	63.966/104.6	0.58345
4930590J08Rik_sg2	4930590J08Rik	13.853/2.6207	0/9.7124	-0.65744
4930590J08Rik_sg3	4930590J08Rik	91.431/86.482	123.93/77.7	0.17868
4930590J08Rik_sg4	4930590J08Rik	139.92/307.49	300.64/539.41	0.90588
4930595M18Rik_sg1	4930595M18Rik	88.66/80.367	46.376/75.458	-0.46583
4930595M18Rik_sg2	4930595M18Rik	92.123/33.195	51.173/40.344	-0.44514
4930595M18Rik_sg3	4930595M18Rik	89.353/123.17	23.987/34.367	-1.8296
4930595M18Rik_sg4	4930595M18Rik	60.954/124.05	219.08/29.884	0.42447
4930596D02Rik_sg1	4930596D02Rik	0/26.207	51.173/157.64	2.9019
4930596D02Rik_sg2	4930596D02Rik	31.862/23.586	23.188/0	-1.1895
4930596D02Rik_sg3	4930596D02Rik	33.248/29.701	141.53/26.149	1.3854
4930596D02Rik_sg4	4930596D02Rik	87.275/42.804	32.783/95.63	-0.018317
4931406B18Rik_sg1	4931406B18Rik	82.426/15.724	63.966/0	-0.60237
4931406B18Rik_sg2	4931406B18Rik	7.6192/278.67	33.582/0	-3.0183
4931406B18Rik_sg3	4931406B18Rik	42.945/62.023	156.72/31.379	0.82956
4931406B18Rik_sg4	4931406B18Rik	51.257/63.77	43.177/33.62	-0.57062
4931406C07Rik_sg1	4931406C07Rik	205.03/64.643	75.16/165.86	-0.16079
4931406C07Rik_sg2	4931406C07Rik	43.637/105.7	115.94/16.436	-0.17151
4931406C07Rik_sg3	4931406C07Rik	27.014/116.18	79.158/76.952	0.12292
4931406C07Rik_sg4	4931406C07Rik	32.555/0	76.759/7.4711	1.3193
4931408C20Rik_sg1	4931408C20Rik	178.71/38.437	200.69/61.263	0.26844
4931408C20Rik_sg2	4931408C20Rik	62.339/366.9	70.363/19.425	-2.2321
4931408C20Rik_sg3	4931408C20Rik	86.582/120.55	209.49/226.37	1.0661
4931408C20Rik_sg4	4931408C20Rik	202.95/48.046	47.975/91.148	-0.84216
4931414P19Rik_sg1	4931414P19Rik	22.165/111.82	78.359/17.931	-0.4683
4931414P19Rik_sg2	4931414P19Rik	23.55/51.54	11.994/67.24	0.075527
4931414P19Rik_sg3	4931414P19Rik	12.468/42.804	115.14/40.344	1.4593
4931414P19Rik_sg4	4931414P19Rik	15.238/34.069	44.776/17.931	0.33476
4931417E11Rik_sg1	4931417E11Rik	59.569/27.08	2.3987/70.228	-0.2484
4931417E11Rik_sg2	4931417E11Rik	65.802/131.03	30.384/8.9653	-2.2656
4931417E11Rik_sg3	4931417E11Rik	18.702/2.6207	8.7954/17.184	0.26262
4931417E11Rik_sg4	4931417E11Rik	28.399/51.54	47.175/25.402	-0.13582
4931428F04Rik_sg1	4931428F04Rik	78.27/22.713	66.365/39.597	0.068117
4931428F04Rik_sg2	4931428F04Rik	25.628/11.356	6.3966/7.4711	-1.2968
4931428F04Rik_sg3	4931428F04Rik	26.321/24.46	0/0	-4.7219
4931428F04Rik_sg4	4931428F04Rik	6.9266/20.092	10.395/2.2413	-0.98746
4931429L15Rik_sg1	4931429L15Rik	103.9/32.322	53.572/77.7	-0.052604
4931429L15Rik_sg2	4931429L15Rik	15.238/25.333	31.983/27.643	0.53365
4931429L15Rik_sg3	4931429L15Rik	150.31/77.747	68.764/52.298	-0.90259
4931429L15Rik_sg4	4931429L15Rik	102.51/32.322	51.973/0	-1.3421
4932411N23Rik_sg1	4932411N23Rik	15.931/8.7356	71.962/44.827	2.1553
4932411N23Rik_sg2	4932411N23Rik	103.9/0	59.968/54.539	0.13774
4932411N23Rik_sg3	4932411N23Rik	15.238/143.26	95.949/43.332	-0.18402
4932411N23Rik_sg4	4932411N23Rik	96.279/193.93	0/50.056	-2.4889
4932414N04Rik_sg1	4932414N04Rik	81.734/25.333	24.787/39.597	-0.71631
4932414N04Rik_sg2	4932414N04Rik	142.69/196.55	103.95/77.7	-0.89386
4932414N04Rik_sg3	4932414N04Rik	60.954/11.356	169.51/88.906	1.8092
4932414N04Rik_sg4	4932414N04Rik	8.3119/55.034	11.194/27.643	-0.67822
4932429P05Rik_sg1	4932429P05Rik	41.559/43.678	47.175/106.84	0.83864
4932429P05Rik_sg2	4932429P05Rik	107.36/55.908	139.13/104.6	0.57221
4932429P05Rik_sg3	4932429P05Rik	132.3/70.758	53.572/12.701	-1.5866
4932429P05Rik_sg4	4932429P05Rik	310.31/27.08	52.772/67.987	-1.4671
4932438A13Rik_sg1	4932438A13Rik	105.28/189.56	0/64.252	-2.1637
4932438A13Rik_sg2	4932438A13Rik	39.481/7.862	0/20.919	-1.1063
4932438A13Rik_sg3	4932438A13Rik	6.9266/6.9885	0/16.436	0.21217
4932438A13Rik_sg4	4932438A13Rik	40.174/41.931	225.48/84.424	1.8908
4932438H23Rik_sg1	4932438H23Rik	5.5413/62.896	61.568/67.987	0.90124
4932438H23Rik_sg2	4932438H23Rik	47.101/39.31	27.985/8.9653	-1.1826
4932438H23Rik_sg3	4932438H23Rik	30.477/110.94	101.55/33.62	-0.064309
4932438H23Rik_sg4	4932438H23Rik	112.21/36.69	34.382/67.987	-0.5319
4933402D24Rik_sg1	4933402D24Rik	123.99/136.28	25.586/0	-3.249
4933402D24Rik_sg2	4933402D24Rik	196.02/200.05	49.574/77.7	-1.6226
4933402D24Rik_sg3	4933402D24Rik	82.426/33.195	26.386/36.608	-0.85576
4933402D24Rik_sg4	4933402D24Rik	3.4633/65.517	89.553/33.62	0.81843
4933402E13Rik_sg1	4933402E13Rik	40.174/36.69	43.977/37.356	0.079516
4933402E13Rik_sg2	4933402E13Rik	99.743/56.781	148.72/68.734	0.46923
4933402E13Rik_sg3	4933402E13Rik	30.477/30.575	34.382/17.931	-0.21525
4933402E13Rik_sg4	4933402E13Rik	51.257/138.9	103.15/112.81	0.18181
4933402J07Rik_sg1	4933402J07Rik	60.261/0	93.551/52.298	1.2477
4933402J07Rik_sg2	4933402J07Rik	264.6/52.414	130.33/39.597	-0.89179
4933402J07Rik_sg3	4933402J07Rik	119.14/89.103	102.35/125.51	0.12872
4933402J07Rik_sg4	4933402J07Rik	22.165/47.172	0/149.42	1.0858
4933402N03Rik_sg1	4933402N03Rik	60.954/11.356	28.785/8.2182	-0.92997
4933402N03Rik_sg2	4933402N03Rik	36.018/18.345	9.5949/8.2182	-1.5083
4933402N03Rik_sg3	4933402N03Rik	69.266/65.517	47.175/40.344	-0.61162
4933402N03Rik_sg4	4933402N03Rik	28.399/0	39.979/6.724	0.67999
4933402N22Rik_sg1	4933402N22Rik	30.477/14.851	0/15.689	-1.4198
4933402N22Rik_sg2	4933402N22Rik	22.165/142.39	3.1983/2.9884	-4.3466
4933402N22Rik_sg3	4933402N22Rik	120.52/0	0/2.9884	-4.6183
4933402N22Rik_sg4	4933402N22Rik	0/5.2414	0/0	-1.8563
4933403O08Rik_sg1	4933403O08Rik	105.28/63.77	36.781/51.551	-0.92115
4933403O08Rik_sg2	4933403O08Rik	31.862/37.563	27.985/0	-1.2522
4933403O08Rik_sg3	4933403O08Rik	77.578/65.517	71.162/37.356	-0.39271
4933403O08Rik_sg4	4933403O08Rik	9.0045/334.57	37.58/113.56	-1.1742
4933405L10Rik_sg1	4933405L10Rik	5.5413/72.505	27.186/61.263	0.17626
4933405L10Rik_sg2	4933405L10Rik	71.344/0	33.582/62.01	0.4121
4933405L10Rik_sg3	4933405L10Rik	33.94/5.2414	41.578/30.632	0.84961
4933405L10Rik_sg4	4933405L10Rik	105.98/90.85	39.979/70.228	-0.82535
4933405O20Rik_sg1	4933405O20Rik	72.729/13.977	21.589/6.724	-1.5491
4933405O20Rik_sg2	4933405O20Rik	10.39/40.184	90.352/26.149	1.1725
4933405O20Rik_sg3	4933405O20Rik	43.637/54.161	91.951/13.448	0.1059
4933405O20Rik_sg4	4933405O20Rik	29.092/0	91.951/121.78	2.7946
4933409G03Rik_sg1	4933409G03Rik	72.036/18.345	47.975/17.184	-0.46003
4933409G03Rik_sg2	4933409G03Rik	13.16/33.195	282.25/16.436	2.6365
4933409G03Rik_sg3	4933409G03Rik	32.555/53.287	79.158/51.551	0.59528
4933409G03Rik_sg4	4933409G03Rik	5.5413/18.345	22.388/0	-0.085991
4933411K16Rik_sg1	4933411K16Rik	45.023/61.149	7.9958/2.9884	-3.0585
4933411K16Rik_sg2	4933411K16Rik	9.6972/9.6092	156.72/30.632	3.1517
4933411K16Rik_sg3	4933411K16Rik	6.2339/13.103	21.589/0	0.14471
4933411K16Rik_sg4	4933411K16Rik	169.7/133.65	208.69/37.356	-0.29989
4933412E24Rik_sg1	4933412E24Rik	42.252/29.701	27.186/13.448	-0.79462
4933412E24Rik_sg2	4933412E24Rik	133.68/82.115	57.57/59.769	-0.86793
4933412E24Rik_sg3	4933412E24Rik	71.344/200.92	95.949/44.827	-0.9418
4933412E24Rik_sg4	4933412E24Rik	13.853/23.586	74.361/8.2182	1.1007
4933417A18Rik_sg1	4933417A18Rik	66.495/47.172	115.94/67.24	0.67894
4933417A18Rik_sg2	4933417A18Rik	51.949/20.092	16.791/2.9884	-1.7654
4933417A18Rik_sg3	4933417A18Rik	24.243/40.184	169.51/22.413	1.5457
4933417A18Rik_sg4	4933417A18Rik	156.54/203.54	299.84/144.19	0.30085
4933421I07Rik_sg1	4933421I07Rik	71.344/5.2414	15.992/162.87	1.2026
4933421I07Rik_sg2	4933421I07Rik	11.083/45.425	206.29/155.4	2.636
4933421I07Rik_sg3	4933421I07Rik	38.096/29.701	22.388/36.608	-0.19444
4933421I07Rik_sg4	4933421I07Rik	84.504/48.919	74.361/31.379	-0.32993
4933427D06Rik_sg1	4933427D06Rik	21.472/0	59.968/14.942	1.7122
4933427D06Rik_sg2	4933427D06Rik	6.2339/23.586	0/13.448	-1.0425
4933427D06Rik_sg3	4933427D06Rik	2.7706/20.092	16.791/6.724	0.037382
4933427D06Rik_sg4	4933427D06Rik	76.885/266.44	6.3966/83.676	-1.9071
4933427D14Rik_sg1	4933427D14Rik	27.014/70.758	35.981/76.205	0.19468
4933427D14Rik_sg2	4933427D14Rik	101.82/61.149	20.789/0	-2.8558
4933427D14Rik_sg3	4933427D14Rik	81.734/13.103	24.787/158.39	0.93526
4933427D14Rik_sg4	4933427D14Rik	2.7706/0	18.39/35.861	3.5596
4933428G20Rik_sg1	4933428G20Rik	15.931/133.65	61.568/67.24	-0.21269
4933428G20Rik_sg2	4933428G20Rik	0/0	0/0	-0.42903
4933428G20Rik_sg3	4933428G20Rik	0.69266/27.954	27.985/0	-0.031474
4933428G20Rik_sg4	4933428G20Rik	74.807/27.954	14.392/93.389	0.067531
4933430I17Rik_sg1	4933430I17Rik	40.867/95.218	191.9/56.033	0.85598
4933430I17Rik_sg2	4933430I17Rik	0/0	0/0	-0.42903
4933430I17Rik_sg3	4933430I17Rik	76.885/61.149	131.13/138.22	0.95436
4933430I17Rik_sg4	4933430I17Rik	37.404/9.6092	12.793/59.022	0.59076
4933434E20Rik_sg1	4933434E20Rik	56.798/22.713	89.553/2.2413	0.20251
4933434E20Rik_sg2	4933434E20Rik	91.431/295.26	108.74/53.792	-1.2402
4933434E20Rik_sg3	4933434E20Rik	15.931/6.9885	12.793/33.62	0.95812
4933434E20Rik_sg4	4933434E20Rik	13.853/66.391	155.92/10.46	1.0337
4933436I01Rik_sg1	4933436I01Rik	47.101/60.276	43.977/0	-1.2503
4933436I01Rik_sg2	4933436I01Rik	15.238/237.61	12.793/63.504	-1.7026
4933436I01Rik_sg3	4933436I01Rik	69.958/8.7356	11.994/9.7124	-1.7672
4933436I01Rik_sg4	4933436I01Rik	6.2339/41.057	19.19/121.78	1.5363
5031410I06Rik_sg1	5031410I06Rik	2.7706/62.896	10.395/0	-2.4487
5031410I06Rik_sg2	5031410I06Rik	15.238/0	80.757/0	2.2633
5031410I06Rik_sg3	5031410I06Rik	34.633/97.839	51.173/0.74711	-1.3184
5031410I06Rik_sg4	5031410I06Rik	23.55/1.7471	34.382/2.9884	0.52834
5430401F13Rik_sg1	5430401F13Rik	109.44/10.483	63.966/56.033	0.00091026
5430401F13Rik_sg2	5430401F13Rik	70.651/68.138	11.994/14.195	-2.3203
5430401F13Rik_sg3	5430401F13Rik	8.3119/102.21	6.3966/112.81	0.10735
5430401F13Rik_sg4	5430401F13Rik	62.339/0	51.173/79.941	1.0489
5430402E10Rik_sg1	5430402E10Rik	10.39/0	46.376/0	1.9651
5430402E10Rik_sg2	5430402E10Rik	33.248/76	55.97/0	-0.94038
5430402E10Rik_sg3	5430402E10Rik	6.9266/76.873	6.3966/200.23	1.2818
5430402E10Rik_sg4	5430402E10Rik	49.179/53.287	116.74/56.78	0.74859
5430427O19Rik_sg1	5430427O19Rik	72.036/30.575	133.53/0.74711	0.3815
5430427O19Rik_sg2	5430427O19Rik	18.009/9.6092	5.597/18.678	-0.17281
5430427O19Rik_sg3	5430427O19Rik	99.05/146.76	0/22.413	-3.3435
5430427O19Rik_sg4	5430427O19Rik	20.087/106.57	0/44.827	-1.4582
5530400C23Rik_sg1	5530400C23Rik	61.647/49.793	19.19/32.873	-1.0692
5530400C23Rik_sg2	5530400C23Rik	10.39/68.138	46.376/61.263	0.4452
5530400C23Rik_sg3	5530400C23Rik	155.85/4.3678	91.152/127.76	0.44553
5530400C23Rik_sg4	5530400C23Rik	79.656/91.724	12.793/42.585	-1.5953
5730409E04Rik_sg1	5730409E04Rik	105.28/82.988	23.987/104.6	-0.5431
5730409E04Rik_sg2	5730409E04Rik	243.82/324.96	82.357/197.24	-1.0193
5730409E04Rik_sg3	5730409E04Rik	18.009/207.03	6.3966/37.356	-2.3111
5730409E04Rik_sg4	5730409E04Rik	56.798/41.057	111.14/92.642	1.0432
5730455P16Rik_sg1	5730455P16Rik	29.784/60.276	134.33/22.413	0.78604
5730455P16Rik_sg2	5730455P16Rik	29.092/228	104.74/18.678	-1.0467
5730455P16Rik_sg3	5730455P16Rik	45.715/208.78	105.54/0	-1.254
5730455P16Rik_sg4	5730455P16Rik	33.248/27.954	47.175/0	-0.36203
5730507C01Rik_sg1	5730507C01Rik	68.573/6.1149	50.373/23.908	-0.0076781
5730507C01Rik_sg2	5730507C01Rik	2.7706/6.9885	7.1962/41.838	2.1177
5730507C01Rik_sg3	5730507C01Rik	11.775/48.919	203.89/102.35	2.2977
5730507C01Rik_sg4	5730507C01Rik	103.21/31.448	40.778/123.27	0.2811
5830411N06Rik_sg1	5830411N06Rik	35.326/36.69	93.551/77.7	1.227
5830411N06Rik_sg2	5830411N06Rik	155.85/98.712	28.785/116.55	-0.80021
5830411N06Rik_sg3	5830411N06Rik	14.546/19.218	75.16/0	1.1093
5830411N06Rik_sg4	5830411N06Rik	47.793/86.482	0/24.655	-2.3541
6030458C11Rik_sg1	6030458C11Rik	29.092/20.965	34.382/103.1	1.4219
6030458C11Rik_sg2	6030458C11Rik	83.812/100.46	72.762/12.701	-1.0907
6030458C11Rik_sg3	6030458C11Rik	54.027/33.195	60.768/66.493	0.5348
6030458C11Rik_sg4	6030458C11Rik	38.096/20.965	0/234.59	1.9541
6030468B19Rik_sg1	6030468B19Rik	18.009/85.609	31.983/19.425	-0.98373
6030468B19Rik_sg2	6030468B19Rik	48.486/0	69.563/0	0.50334
6030468B19Rik_sg3	6030468B19Rik	46.408/164.23	40.778/4.4827	-2.1697
6030468B19Rik_sg4	6030468B19Rik	28.399/23.586	35.181/69.481	0.98242
6030498E09Rik_sg1	6030498E09Rik	17.316/99.586	4.7975/114.31	0.026488
6030498E09Rik_sg2	6030498E09Rik	18.009/29.701	17.591/16.436	-0.46445
6030498E09Rik_sg3	6030498E09Rik	117.06/73.379	117.54/60.516	-0.095966
6030498E09Rik_sg4	6030498E09Rik	20.087/10.483	87.154/0	1.4528
6330409D20Rik_sg1	6330409D20Rik	59.569/31.448	27.186/19.425	-0.93622
6330409D20Rik_sg2	6330409D20Rik	13.853/117.06	38.38/27.643	-0.96636
6330409D20Rik_sg3	6330409D20Rik	15.238/49.793	35.981/34.367	0.11012
6330409D20Rik_sg4	6330409D20Rik	98.357/40.184	95.15/14.195	-0.33596
6430548M08Rik_sg1	6430548M08Rik	3.4633/41.057	32.783/29.137	0.4584
6430548M08Rik_sg2	6430548M08Rik	58.183/36.69	95.949/9.7124	0.15234
6430548M08Rik_sg3	6430548M08Rik	41.559/17.471	27.985/11.954	-0.54124
6430548M08Rik_sg4	6430548M08Rik	20.78/72.505	83.156/5.2298	-0.076154
6430550D23Rik_sg1	6430550D23Rik	10.39/2.6207	57.57/6.724	2.1429
6430550D23Rik_sg2	6430550D23Rik	2.7706/8.7356	100.75/37.356	3.3748
6430550D23Rik_sg3	6430550D23Rik	22.165/14.851	0/75.458	0.98937
6430550D23Rik_sg4	6430550D23Rik	22.858/0	8.7954/101.61	2.1769
6430571L13Rik_sg1	6430571L13Rik	15.238/84.735	62.367/100.11	0.68971
6430571L13Rik_sg2	6430571L13Rik	37.404/59.402	21.589/88.906	0.18719
6430571L13Rik_sg3	6430571L13Rik	53.335/188.69	131.93/126.26	0.092557
6430571L13Rik_sg4	6430571L13Rik	54.72/6.9885	8.7954/50.056	-0.066184
6820408C15Rik_sg1	6820408C15Rik	83.812/36.69	22.388/41.091	-0.90368
6820408C15Rik_sg2	6820408C15Rik	48.486/27.08	0/10.46	-2.6382
6820408C15Rik_sg3	6820408C15Rik	89.353/204.41	16.791/101.61	-1.2966
6820408C15Rik_sg4	6820408C15Rik	25.628/6.1149	0/31.379	-0.015673
7420426K07Rik_sg1	7420426K07Rik	65.802/38.437	56.77/39.597	-0.11107
7420426K07Rik_sg2	7420426K07Rik	42.945/35.816	8.7954/82.929	0.21478
7420426K07Rik_sg3	7420426K07Rik	26.321/262.94	64.766/96.377	-0.83618
7420426K07Rik_sg4	7420426K07Rik	38.096/68.138	21.589/32.873	-0.93881
7530416G11Rik_sg1	7530416G11Rik	21.472/1.7471	7.9958/11.954	-0.20035
7530416G11Rik_sg2	7530416G11Rik	86.582/9.6092	283.05/22.413	1.6467
7530416G11Rik_sg3	7530416G11Rik	45.023/0	11.994/21.666	-0.39906
7530416G11Rik_sg4	7530416G11Rik	173.86/144.14	335.82/191.26	0.72545
8030423J24Rik_sg1	8030423J24Rik	28.399/32.322	69.563/72.47	1.1994
8030423J24Rik_sg2	8030423J24Rik	81.734/2.6207	72.762/57.528	0.61536
8030423J24Rik_sg3	8030423J24Rik	40.867/41.931	27.985/45.574	-0.16642
8030423J24Rik_sg4	8030423J24Rik	132.3/106.57	109.54/105.34	-0.15134
8030462N17Rik_sg1	8030462N17Rik	22.165/121.42	154.32/35.861	0.40055
8030462N17Rik_sg2	8030462N17Rik	89.353/18.345	16.791/5.2298	-2.1912
8030462N17Rik_sg3	8030462N17Rik	289.53/310.11	86.354/72.47	-1.9034
8030462N17Rik_sg4	8030462N17Rik	16.624/119.68	16.791/19.425	-1.8556
9030624G23Rik_sg1	9030624G23Rik	0/0	0/0	-0.42903
9030624G23Rik_sg2	9030624G23Rik	0/95.218	0/0	-5.6032
9030624G23Rik_sg3	9030624G23Rik	22.165/8.7356	0/4.4827	-2.3435
9030624G23Rik_sg4	9030624G23Rik	0.69266/0	0/0	-0.42903
9130008F23Rik_sg1	9130008F23Rik	6.9266/10.483	0/26.896	0.57412
9130008F23Rik_sg2	9130008F23Rik	0.69266/104.83	108.74/81.435	0.83784
9130008F23Rik_sg3	9130008F23Rik	214.72/101.33	39.979/0	-2.9215
9130008F23Rik_sg4	9130008F23Rik	26.321/0	15.992/0	-0.65455
9130019O22Rik_sg1	9130019O22Rik	63.724/56.781	60.768/51.551	-0.099791
9130019O22Rik_sg2	9130019O22Rik	18.702/6.1149	12.793/0	-0.85819
9130019O22Rik_sg3	9130019O22Rik	190.48/308.37	87.954/96.377	-1.4265
9130019O22Rik_sg4	9130019O22Rik	134.38/187.82	74.361/100.11	-0.87739
9130023H24Rik_sg1	9130023H24Rik	122.6/132.78	52.772/14.942	-1.8844
9130023H24Rik_sg2	9130023H24Rik	119.83/55.908	79.958/9.7124	-0.95522
9130023H24Rik_sg3	9130023H24Rik	7.6192/5.2414	11.994/3.7356	0.25464
9130023H24Rik_sg4	9130023H24Rik	10.39/42.804	5.597/35.861	-0.34488
9130401M01Rik_sg1	9130401M01Rik	58.876/75.126	101.55/70.228	0.35359
9130401M01Rik_sg2	9130401M01Rik	22.165/5.2414	93.551/94.883	2.6951
9130401M01Rik_sg3	9130401M01Rik	89.353/28.827	7.1962/72.47	-0.55739
9130401M01Rik_sg4	9130401M01Rik	33.94/34.069	19.19/147.18	1.266
9130409I23Rik_sg1	9130409I23Rik	73.422/69.011	40.778/35.861	-0.87707
9130409I23Rik_sg2	9130409I23Rik	23.55/71.632	15.192/0	-2.499
9130409I23Rik_sg3	9130409I23Rik	92.123/55.908	152.72/68.734	0.57471
9130409I23Rik_sg4	9130409I23Rik	15.238/48.046	45.576/45.574	0.51282
9230112D13Rik_sg1	9230112D13Rik	27.014/20.092	27.186/21.666	0.050416
9230112D13Rik_sg2	9230112D13Rik	85.197/31.448	72.762/73.964	0.326
9230112D13Rik_sg3	9230112D13Rik	11.775/10.483	75.16/124.77	3.0573
9230112D13Rik_sg4	9230112D13Rik	62.339/153.75	41.578/135.97	-0.28049
9330159F19Rik_sg1	9330159F19Rik	288.84/82.988	40.778/121.78	-1.1838
9330159F19Rik_sg2	9330159F19Rik	0/34.069	74.361/0	1.0821
9330159F19Rik_sg3	9330159F19Rik	46.408/94.344	132.73/66.493	0.49528
9330159F19Rik_sg4	9330159F19Rik	4.8486/32.322	8.7954/133.73	1.8835
9330182O14Rik_sg1	9330182O14Rik	5.5413/41.931	147.92/31.379	1.8737
9330182O14Rik_sg2	9330182O14Rik	28.399/29.701	44.776/19.425	0.13949
9330182O14Rik_sg3	9330182O14Rik	90.738/0	241.47/0	1.3925
9330182O14Rik_sg4	9330182O14Rik	9.0045/0	63.167/0	2.566
9430015G10Rik_sg1	9430015G10Rik	6.2339/30.575	6.3966/100.86	1.4933
9430015G10Rik_sg2	9430015G10Rik	79.656/22.713	35.981/63.504	-0.040409
9430015G10Rik_sg3	9430015G10Rik	184.94/23.586	16.791/86.665	-0.99735
9430015G10Rik_sg4	9430015G10Rik	171.78/157.24	177.51/41.838	-0.58062
9430038I01Rik_sg1	9430038I01Rik	43.637/138.02	150.32/106.84	0.49679
9430038I01Rik_sg2	9430038I01Rik	85.197/82.115	28.785/47.815	-1.1071
9430038I01Rik_sg3	9430038I01Rik	90.045/203.54	0/28.39	-3.2819
9430038I01Rik_sg4	9430038I01Rik	108.75/225.38	47.975/43.332	-1.8489
9430069I07Rik_sg1	9430069I07Rik	137.15/17.471	49.574/44.827	-0.70013
9430069I07Rik_sg2	9430069I07Rik	35.326/0	46.376/0	0.37411
9430069I07Rik_sg3	9430069I07Rik	75.5/28.827	15.992/107.58	0.24005
9430069I07Rik_sg4	9430069I07Rik	22.165/103.08	63.167/41.838	-0.24993
9530002B09Rik_sg1	9530002B09Rik	68.573/20.092	59.968/100.11	0.8381
9530002B09Rik_sg2	9530002B09Rik	49.871/93.471	30.384/159.88	0.40365
9530002B09Rik_sg3	9530002B09Rik	56.105/41.057	137.53/29.137	0.76629
9530002B09Rik_sg4	9530002B09Rik	74.807/294.39	0/82.929	-2.1278
9530003J23Rik_sg1	9530003J23Rik	20.78/0	33.582/8.2182	0.9432
9530003J23Rik_sg2	9530003J23Rik	76.192/34.942	63.167/46.321	-0.021159
9530003J23Rik_sg3	9530003J23Rik	127.45/65.517	8.7954/0	-4.1747
9530003J23Rik_sg4	9530003J23Rik	76.885/88.23	61.568/45.574	-0.61464
9530053A07Rik_sg1	9530053A07Rik	153.08/106.57	79.958/60.516	-0.87695
9530053A07Rik_sg2	9530053A07Rik	80.348/8.7356	6.3966/85.918	0.050282
9530053A07Rik_sg3	9530053A07Rik	51.257/6.1149	43.977/37.356	0.4891
9530053A07Rik_sg4	9530053A07Rik	6.2339/47.172	123.93/106.09	2.0662
9530068E07Rik_sg1	9530068E07Rik	94.894/27.08	135.13/69.481	0.73687
9530068E07Rik_sg2	9530068E07Rik	100.44/11.356	77.559/53.792	0.22883
9530068E07Rik_sg3	9530068E07Rik	22.858/13.977	22.388/0	-0.67116
9530068E07Rik_sg4	9530068E07Rik	73.422/37.563	57.57/91.148	0.41572
9530077C05Rik_sg1	9530077C05Rik	30.477/4.3678	45.576/74.711	1.7307
9530077C05Rik_sg2	9530077C05Rik	28.399/89.977	116.74/19.425	0.19883
9530077C05Rik_sg3	9530077C05Rik	31.17/0	59.968/85.918	2.1566
9530077C05Rik_sg4	9530077C05Rik	107.36/27.08	289.45/121.03	1.596
9830107B12Rik_sg1	9830107B12Rik	110.13/124.92	76.759/31.379	-1.1059
9830107B12Rik_sg2	9830107B12Rik	205.03/95.218	167.11/8.9653	-0.76321
9830107B12Rik_sg3	9830107B12Rik	67.88/34.069	92.751/0.74711	-0.12233
9830107B12Rik_sg4	9830107B12Rik	42.252/100.46	15.992/52.298	-1.0418
9930012K11Rik_sg1	9930012K11Rik	54.72/51.54	21.589/20.919	-1.2824
9930012K11Rik_sg2	9930012K11Rik	142.69/82.988	26.386/98.619	-0.8421
9930012K11Rik_sg3	9930012K11Rik	46.408/27.08	40.778/63.504	0.49358
9930012K11Rik_sg4	9930012K11Rik	31.862/141.52	13.593/88.159	-0.75734
9930111J21Rik1_sg1	9930111J21Rik1	36.018/19.218	69.563/57.528	1.1734
9930111J21Rik1_sg2	9930111J21Rik1	11.083/43.678	48.774/23.16	0.38136
9930111J21Rik1_sg3	9930111J21Rik1	92.816/165.98	68.764/124.02	-0.42103
9930111J21Rik1_sg4	9930111J21Rik1	80.348/8.7356	13.593/0	-2.5463
a_sg1	a	31.17/66.391	9.5949/52.298	-0.63992
a_sg2	a	0/42.804	85.555/27.643	1.3624
a_sg3	a	11.775/27.954	31.983/40.344	0.83284
a_sg4	a	9.0045/12.23	60.768/26.896	1.9483
A130010J15Rik_sg1	A130010J15Rik	69.266/64.643	51.173/77.7	-0.05448
A130010J15Rik_sg2	A130010J15Rik	38.096/201.79	49.574/30.632	-1.557
A130010J15Rik_sg3	A130010J15Rik	7.6192/109.19	99.947/88.159	0.6781
A130010J15Rik_sg4	A130010J15Rik	134.38/139.77	47.175/56.78	-1.382
A1bg_sg1	A1bg	36.711/114.44	20.789/40.344	-1.2785
A1bg_sg2	A1bg	56.798/83.862	80.757/38.103	-0.23924
A1bg_sg3	A1bg	104.59/0	57.57/16.436	-0.4879
A1bg_sg4	A1bg	111.52/25.333	145.52/101.61	0.84336
A1cf_sg1	A1cf	2.078/0	0/0	-1.0279
A1cf_sg2	A1cf	42.252/126.67	20.789/12.701	-2.2678
A1cf_sg3	A1cf	33.94/147.63	0/12.701	-3.6424
A1cf_sg4	A1cf	14.546/19.218	15.192/14.942	-0.1544
A26c3_sg1	A26c3	76.885/75.126	132.73/47.068	0.2393
A26c3_sg2	A26c3	106.67/69.885	37.58/59.022	-0.85667
A26c3_sg3	A26c3	67.88/124.92	7.9958/82.929	-1.0678
A26c3_sg4	A26c3	13.16/96.965	31.983/71.723	-0.085062
A2m_sg1	A2m	60.954/75.126	10.395/10.46	-2.595
A2m_sg2	A2m	74.114/46.299	159.92/94.136	1.0647
A2m_sg3	A2m	101.13/0	7.9958/36.608	-1.1459
A2m_sg4	A2m	6.9266/6.1149	44.776/9.7124	1.909
A2ml1_sg1	A2ml1	10.39/29.701	20.789/0	-0.88517
A2ml1_sg2	A2ml1	16.624/19.218	24.787/18.678	0.26475
A2ml1_sg3	A2ml1	9.0045/34.069	24.787/0	-0.75075
A2ml1_sg4	A2ml1	89.353/30.575	165.51/80.688	1.0255
A3galt2_sg1	A3galt2	94.894/1.7471	35.181/72.47	0.15266
A3galt2_sg2	A3galt2	64.417/149.38	224.68/10.46	0.13608
A3galt2_sg3	A3galt2	15.931/121.42	83.156/29.884	-0.27663
A3galt2_sg4	A3galt2	130.91/82.988	188.7/123.27	0.54028
A430005L14Rik_sg1	A430005L14Rik	27.014/69.011	106.34/45.574	0.65094
A430005L14Rik_sg2	A430005L14Rik	110.83/3.4942	15.192/50.804	-0.77458
A430005L14Rik_sg3	A430005L14Rik	76.192/400.09	132.73/106.09	-0.98991
A430005L14Rik_sg4	A430005L14Rik	47.793/27.954	35.181/23.908	-0.34788
A430033K04Rik_sg1	A430033K04Rik	74.807/191.31	177.51/31.379	-0.3464
A430033K04Rik_sg2	A430033K04Rik	17.316/44.552	27.186/44.827	0.21267
A430033K04Rik_sg3	A430033K04Rik	31.17/29.701	99.148/27.643	1.0346
A430033K04Rik_sg4	A430033K04Rik	43.637/23.586	84.755/88.906	1.3435
A4galt_sg1	A4galt	96.279/70.758	155.12/70.228	0.42755
A4galt_sg2	A4galt	67.188/17.471	1.5992/0	-4.5896
A4galt_sg3	A4galt	55.413/27.08	31.983/47.815	-0.046762
A4galt_sg4	A4galt	227.88/34.069	87.154/156.15	-0.10573
A4gnt_sg1	A4gnt	13.16/100.46	2.3987/36.608	-1.4954
A4gnt_sg2	A4gnt	12.468/17.471	27.985/5.2298	0.14087
A4gnt_sg3	A4gnt	3.4633/0	26.386/50.804	3.8575
A4gnt_sg4	A4gnt	130.22/58.529	99.947/48.562	-0.34181
A530016L24Rik_sg1	A530016L24Rik	15.931/0	95.949/71.723	3.2422
A530016L24Rik_sg2	A530016L24Rik	11.083/29.701	127.13/93.389	2.3788
A530016L24Rik_sg3	A530016L24Rik	49.179/2.6207	60.768/0	0.22244
A530016L24Rik_sg4	A530016L24Rik	36.018/256.83	110.34/8.2182	-1.2902
A530032D15Rik_sg1	A530032D15Rik	2.078/4.3678	0/0	-2.0782
A530032D15Rik_sg2	A530032D15Rik	27.014/0	0/0	-3.8587
A530032D15Rik_sg3	A530032D15Rik	24.936/23.586	0/0	-4.6588
A530032D15Rik_sg4	A530032D15Rik	38.096/172.09	75.96/88.906	-0.34665
A530064D06Rik_sg1	A530064D06Rik	160.7/11.356	24.787/0	-2.6999
A530064D06Rik_sg2	A530064D06Rik	105.98/0	55.171/67.24	0.20439
A530064D06Rik_sg3	A530064D06Rik	17.316/160.73	91.951/44.827	-0.37563
A530064D06Rik_sg4	A530064D06Rik	96.279/6.1149	7.9958/13.448	-2.1548
A630001G21Rik_sg1	A630001G21Rik	99.743/19.218	237.47/11.207	1.0513
A630001G21Rik_sg2	A630001G21Rik	41.559/262.94	98.348/85.171	-0.72433
A630001G21Rik_sg3	A630001G21Rik	85.89/150.25	65.565/156.89	-0.085371
A630001G21Rik_sg4	A630001G21Rik	33.248/23.586	152.72/59.769	1.8662
A630023A22Rik_sg1	A630023A22Rik	133.68/84.735	50.373/82.929	-0.70405
A630023A22Rik_sg2	A630023A22Rik	83.812/17.471	11.994/47.068	-0.75826
A630023A22Rik_sg3	A630023A22Rik	47.793/21.839	41.578/44.827	0.30351
A630023A22Rik_sg4	A630023A22Rik	35.326/16.598	103.95/171.84	2.365
A630073D07Rik_sg1	A630073D07Rik	15.238/94.344	72.762/8.2182	-0.42728
A630073D07Rik_sg2	A630073D07Rik	132.99/17.471	59.169/76.952	-0.14251
A630073D07Rik_sg3	A630073D07Rik	2.078/138.9	0/0	-6.1596
A630073D07Rik_sg4	A630073D07Rik	29.092/165.1	166.31/17.184	-0.080898
A630076J17Rik_sg1	A630076J17Rik	0/0	0/0	-0.42903
A630076J17Rik_sg2	A630076J17Rik	43.637/5.2414	10.395/77.7	0.82437
A630076J17Rik_sg3	A630076J17Rik	64.417/7.862	153.52/0	1.0661
A630076J17Rik_sg4	A630076J17Rik	2.7706/32.322	0/64.252	0.83683
A630095N17Rik_sg1	A630095N17Rik	13.853/11.356	65.565/4.4827	1.4049
A630095N17Rik_sg2	A630095N17Rik	171.09/50.666	26.386/0	-2.9787
A630095N17Rik_sg3	A630095N17Rik	170.39/135.4	91.152/128.5	-0.47366
A630095N17Rik_sg4	A630095N17Rik	56.105/127.54	11.994/47.068	-1.6042
A830018L16Rik_sg1	A830018L16Rik	4.1559/6.9885	27.186/25.402	2.0541
A830018L16Rik_sg2	A830018L16Rik	220.96/76.873	109.54/147.93	-0.20858
A830018L16Rik_sg3	A830018L16Rik	21.472/20.965	107.14/43.332	1.7787
A830018L16Rik_sg4	A830018L16Rik	119.83/44.552	5.597/5.2298	-3.6973
A930009A15Rik_sg1	A930009A15Rik	24.243/36.69	103.95/26.149	1.0697
A930009A15Rik_sg2	A930009A15Rik	31.862/0	79.958/56.78	2.0346
A930009A15Rik_sg3	A930009A15Rik	2.078/77.747	6.3966/6.724	-2.436
A930009A15Rik_sg4	A930009A15Rik	162.08/257.7	41.578/114.31	-1.4176
A930018P22Rik_sg1	A930018P22Rik	16.624/0	7.9958/29.137	1.0712
A930018P22Rik_sg2	A930018P22Rik	177.32/0	18.39/20.919	-2.118
A930018P22Rik_sg3	A930018P22Rik	11.083/15.724	0/0	-3.8483
A930018P22Rik_sg4	A930018P22Rik	29.784/17.471	0/30.632	-0.59402
AA467197_sg1	AA467197	26.321/2.6207	19.989/66.493	1.5158
AA467197_sg2	AA467197	25.628/13.977	17.591/0	-1.0866
AA467197_sg3	AA467197	6.9266/47.172	47.975/35.861	0.61361
AA467197_sg4	AA467197	21.472/6.1149	35.981/0	0.3603
AA792892_sg1	AA792892	60.954/47.172	123.93/47.815	0.65785
AA792892_sg2	AA792892	105.98/49.793	45.576/12.701	-1.3881
AA792892_sg3	AA792892	2.078/24.46	9.5949/23.16	0.28437
AA792892_sg4	AA792892	63.724/6.1149	91.152/11.207	0.5387
AA986860_sg1	AA986860	25.628/99.586	76.759/33.62	-0.17888
AA986860_sg2	AA986860	60.261/13.103	73.561/67.987	0.92958
AA986860_sg3	AA986860	20.087/10.483	4.7975/99.366	1.7047
AA986860_sg4	AA986860	61.647/27.954	63.966/49.309	0.33166
Aaas_sg1	Aaas	23.55/6.1149	17.591/0	-0.69273
Aaas_sg2	Aaas	29.784/0	0/31.379	0.070613
Aaas_sg3	Aaas	18.009/27.954	0/7.4711	-2.3403
Aaas_sg4	Aaas	154.46/31.448	65.565/57.528	-0.58705
Aadac_sg1	Aadac	41.559/186.07	103.15/41.091	-0.65099
Aadac_sg2	Aadac	22.165/27.08	8.7954/153.16	1.6778
Aadac_sg3	Aadac	144.77/37.563	191.1/2.2413	0.083712
Aadac_sg4	Aadac	88.66/0	27.186/44.827	-0.2927
Aadacl2_sg1	Aadacl2	45.715/6.1149	0/88.906	0.75596
Aadacl2_sg2	Aadacl2	22.858/11.356	39.979/94.883	1.9181
Aadacl2_sg3	Aadacl2	0/0	0/0	-0.42903
Aadacl2_sg4	Aadacl2	132.3/67.264	168.71/57.528	0.17932
Aadacl2fm1_sg1	Aadacl2fm1	24.936/4.3678	19.19/32.126	0.76824
Aadacl2fm1_sg2	Aadacl2fm1	225.81/179.08	114.34/54.539	-1.2517
Aadacl2fm1_sg3	Aadacl2fm1	43.637/0	64.766/36.608	1.1796
Aadacl2fm1_sg4	Aadacl2fm1	19.394/12.23	43.177/32.873	1.2149
Aadacl2fm2_sg1	Aadacl2fm2	33.248/27.08	7.9958/58.275	0.13138
Aadacl2fm2_sg2	Aadacl2fm2	127.45/24.46	89.553/37.356	-0.25573
Aadacl2fm2_sg3	Aadacl2fm2	26.321/55.034	62.367/11.954	-0.1272
Aadacl2fm2_sg4	Aadacl2fm2	1.3853/0	3.9979/0	0.82516
Aadacl2fm3_sg1	Aadacl2fm3	6.9266/0	29.584/0	1.823
Aadacl2fm3_sg2	Aadacl2fm3	135.07/143.26	34.382/46.321	-1.7611
Aadacl2fm3_sg3	Aadacl2fm3	0/0	0/0	-0.42903
Aadacl2fm3_sg4	Aadacl2fm3	28.399/14.851	25.586/22.413	0.14402
Aadacl3_sg1	Aadacl3	0/43.678	3.1983/17.184	-1.0292
Aadacl3_sg2	Aadacl3	34.633/141.52	126.33/59.769	0.078428
Aadacl3_sg3	Aadacl3	32.555/28.827	90.352/11.207	0.7083
Aadacl3_sg4	Aadacl3	123.29/126.67	53.572/32.873	-1.5103
Aadacl4_sg1	Aadacl4	91.431/41.931	87.154/0	-0.60245
Aadacl4_sg2	Aadacl4	13.853/127.54	107.94/9.7124	-0.26109
Aadacl4_sg3	Aadacl4	13.16/0	42.378/13.448	1.9314
Aadacl4_sg4	Aadacl4	6.2339/72.505	18.39/0	-1.9854
Aadacl4fm1_sg1	Aadacl4fm1	65.11/63.77	60.768/35.861	-0.40815
Aadacl4fm1_sg2	Aadacl4fm1	132.3/104.83	96.749/74.711	-0.46316
Aadacl4fm1_sg3	Aadacl4fm1	22.858/13.977	32.783/56.78	1.2374
Aadacl4fm1_sg4	Aadacl4fm1	26.321/30.575	33.582/124.77	1.445
Aadacl4fm2_sg1	Aadacl4fm2	12.468/99.586	0/53.045	-1.051
Aadacl4fm2_sg2	Aadacl4fm2	78.963/59.402	55.171/41.091	-0.51448
Aadacl4fm2_sg3	Aadacl4fm2	36.018/163.36	51.173/21.666	-1.428
Aadacl4fm2_sg4	Aadacl4fm2	13.853/25.333	15.992/6.724	-0.73675
AAdacl4fm3_sg1	AAdacl4fm3	50.564/30.575	101.55/190.51	1.8225
AAdacl4fm3_sg2	AAdacl4fm3	167.62/27.08	43.177/14.195	-1.7282
AAdacl4fm3_sg3	AAdacl4fm3	18.009/35.816	24.787/44.08	0.34419
AAdacl4fm3_sg4	AAdacl4fm3	32.555/4.3678	79.958/76.205	2.0227
Aadacl4fm4_sg1	Aadacl4fm4	191.17/151.13	141.53/26.896	-1.0146
Aadacl4fm4_sg2	Aadacl4fm4	4.1559/55.908	14.392/38.103	-0.18763
Aadacl4fm4_sg3	Aadacl4fm4	75.5/68.138	47.975/43.332	-0.64232
Aadacl4fm4_sg4	Aadacl4fm4	127.45/37.563	34.382/0	-2.1987
Aadacl4fm5_sg1	Aadacl4fm5	29.092/131.91	15.192/53.045	-1.2146
Aadacl4fm5_sg2	Aadacl4fm5	42.252/95.218	0/49.309	-1.4427
Aadacl4fm5_sg3	Aadacl4fm5	33.94/11.356	16.791/24.655	-0.12252
Aadacl4fm5_sg4	Aadacl4fm5	123.29/18.345	21.589/13.448	-1.9554
Aadat_sg1	Aadat	33.94/0	20.789/79.194	1.5047
Aadat_sg2	Aadat	22.165/64.643	14.392/67.987	-0.073804
Aadat_sg3	Aadat	12.468/22.713	31.983/40.344	0.99935
Aadat_sg4	Aadat	86.582/119.68	68.764/32.126	-1.0173
Aagab_sg1	Aagab	6.9266/26.207	0/20.172	-0.6641
Aagab_sg2	Aagab	4.1559/21.839	126.33/57.528	2.731
Aagab_sg3	Aagab	30.477/13.103	65.565/125.51	2.0827
Aagab_sg4	Aagab	84.504/26.207	0/0	-5.8165
Aak1_sg1	Aak1	76.885/124.05	61.568/112.07	-0.20841
Aak1_sg2	Aak1	50.564/25.333	27.985/62.01	0.23999
Aak1_sg3	Aak1	78.27/21.839	95.949/118.79	1.0859
Aak1_sg4	Aak1	74.114/94.344	165.51/43.332	0.30676
Aamdc_sg1	Aamdc	150.31/4.3678	11.994/9.7124	-2.7244
Aamdc_sg2	Aamdc	23.55/48.919	13.593/47.068	-0.24909
Aamdc_sg3	Aamdc	42.945/192.18	35.181/20.172	-2.0477
Aamdc_sg4	Aamdc	202.26/78.62	35.981/41.838	-1.8254
Aamp_sg1	Aamp	0.69266/57.655	0/17.184	-1.6534
Aamp_sg2	Aamp	0/17.471	0/0	-3.2833
Aamp_sg3	Aamp	139.92/43.678	71.962/150.92	0.27699
Aamp_sg4	Aamp	9.6972/0	26.386/0	1.279
Aanat_sg1	Aanat	58.183/33.195	71.962/0	-0.33631
Aanat_sg2	Aanat	269.44/266.44	224.68/357.87	0.12004
Aanat_sg3	Aanat	7.6192/155.49	80.757/29.884	-0.55171
Aanat_sg4	Aanat	3.4633/62.023	87.154/22.413	0.72525
Aar2_sg1	Aar2	1.3853/8.7356	22.388/11.954	1.5841
Aar2_sg2	Aar2	26.321/26.207	31.983/52.298	0.66205
Aar2_sg3	Aar2	13.16/145.01	131.93/41.838	0.13406
Aar2_sg4	Aar2	11.775/193.93	66.365/165.86	0.17335
Aard_sg1	Aard	65.802/58.529	19.989/145.69	0.40847
Aard_sg2	Aard	6.9266/8.7356	61.568/15.689	2.1659
Aard_sg3	Aard	60.954/9.6092	51.173/38.85	0.34276
Aard_sg4	Aard	123.99/57.655	51.173/64.252	-0.64515
Aars_sg1	Aars	0/0	6.3966/0	1.6408
Aars_sg2	Aars	3.4633/9.6092	3.9979/32.126	1.3388
Aars_sg3	Aars	2.078/0	0/0	-1.0279
Aars_sg4	Aars	33.94/0	45.576/12.701	0.746
Aars2_sg1	Aars2	44.33/8.7356	35.181/52.298	0.7004
Aars2_sg2	Aars2	23.55/7.862	0/0	-4.0623
Aars2_sg3	Aars2	0.69266/36.69	23.188/57.528	1.0706
Aars2_sg4	Aars2	32.555/0	43.977/0	0.41202
Aarsd1_sg1	Aarsd1	129.53/70.758	217.49/62.757	0.48054
Aarsd1_sg2	Aarsd1	37.404/0	90.352/85.171	2.1716
Aarsd1_sg3	Aarsd1	17.316/6.1149	36.781/6.724	0.8394
Aarsd1_sg4	Aarsd1	88.66/102.21	119.14/177.81	0.6323
Aasdh_sg1	Aasdh	4.1559/105.7	59.968/17.931	-0.4854
Aasdh_sg2	Aasdh	13.16/329.33	18.39/2.2413	-3.9281
Aasdh_sg3	Aasdh	58.876/45.425	13.593/91.148	0.0059508
Aasdh_sg4	Aasdh	58.876/46.299	21.589/17.931	-1.3681
Aasdhppt_sg1	Aasdhppt	73.422/0	0/0	-5.2369
Aasdhppt_sg2	Aasdhppt	9.0045/0	55.171/0	2.3772
Aasdhppt_sg3	Aasdhppt	0/10.483	7.9958/0	-0.32054
Aasdhppt_sg4	Aasdhppt	4.8486/0	0/0	-1.7758
Aass_sg1	Aass	95.587/35.816	41.578/76.205	-0.15536
Aass_sg2	Aass	92.816/0	34.382/67.987	0.13849
Aass_sg3	Aass	76.192/6.9885	9.5949/72.47	-0.019028
Aass_sg4	Aass	76.192/80.367	23.188/12.701	-2.0652
Aatf_sg1	Aatf	59.569/41.931	59.968/110.57	0.73731
Aatf_sg2	Aatf	2.078/39.31	0/34.367	-0.25467
Aatf_sg3	Aatf	11.083/0	25.586/0	1.0763
Aatf_sg4	Aatf	2.7706/44.552	0/0.74711	-4.1662
Aatk_sg1	Aatk	4.1559/64.643	78.359/20.172	0.50583
Aatk_sg2	Aatk	31.17/5.2414	141.53/0	1.9017
Aatk_sg3	Aatk	186.32/14.851	0/33.62	-2.512
Aatk_sg4	Aatk	130.91/144.14	31.983/45.574	-1.8001
AB124611_sg1	AB124611	53.335/135.4	84.755/85.918	-0.14354
AB124611_sg2	AB124611	92.123/45.425	0/0	-6.1246
AB124611_sg3	AB124611	191.17/95.218	147.12/108.33	-0.16372
AB124611_sg4	AB124611	123.29/31.448	33.582/11.954	-1.7213
Abat_sg1	Abat	38.096/33.195	153.52/27.643	1.3214
Abat_sg2	Abat	60.261/117.06	46.376/84.424	-0.43328
Abat_sg3	Abat	0/23.586	28.785/34.367	1.3484
Abat_sg4	Abat	24.936/235.86	262.26/40.344	0.21299
Abca1_sg1	Abca1	22.165/24.46	10.395/17.931	-0.68117
Abca1_sg2	Abca1	25.628/0	51.173/24.655	1.4941
Abca1_sg3	Abca1	83.119/98.712	116.74/26.896	-0.33603
Abca1_sg4	Abca1	21.472/151.13	43.177/25.402	-1.3067
Abca12_sg1	Abca12	0/0	0/0	-0.42903
Abca12_sg2	Abca12	28.399/56.781	144.72/107.58	1.5445
Abca12_sg3	Abca12	16.624/118.8	47.175/113.56	0.24386
Abca12_sg4	Abca12	9.6972/33.195	44.776/39.597	0.94411
Abca13_sg1	Abca13	25.628/122.3	303.04/79.941	1.3605
Abca13_sg2	Abca13	14.546/0	51.973/29.884	2.3415
Abca13_sg3	Abca13	7.6192/0	25.586/10.46	1.9838
Abca13_sg4	Abca13	26.321/77.747	27.186/72.47	-0.0613
Abca14_sg1	Abca14	228.58/60.276	103.95/35.114	-1.044
Abca14_sg2	Abca14	58.183/94.344	64.766/107.58	0.17412
Abca14_sg3	Abca14	143.38/50.666	88.753/8.2182	-0.98611
Abca14_sg4	Abca14	65.802/54.161	41.578/13.448	-1.0968
Abca15_sg1	Abca15	56.105/75.126	31.184/138.22	0.36343
Abca15_sg2	Abca15	23.55/58.529	0/21.666	-1.8289
Abca15_sg3	Abca15	65.802/129.29	107.14/94.136	0.044615
Abca15_sg4	Abca15	129.53/30.575	7.9958/65.746	-1.0977
Abca16_sg1	Abca16	39.481/11.356	48.774/72.47	1.2219
Abca16_sg2	Abca16	58.183/8.7356	43.177/0	-0.6093
Abca16_sg3	Abca16	56.105/438.53	353.41/434.82	0.6701
Abca16_sg4	Abca16	146.84/77.747	144.72/89.653	0.061004
Abca17_sg1	Abca17	141.3/95.218	145.52/93.389	0.014395
Abca17_sg2	Abca17	157.93/305.75	259.06/299.59	0.2678
Abca17_sg3	Abca17	38.789/4.3678	30.384/3.7356	-0.32216
Abca17_sg4	Abca17	47.793/6.1149	85.555/10.46	0.80993
Abca2_sg1	Abca2	50.564/108.32	53.572/41.838	-0.72389
Abca2_sg2	Abca2	40.174/9.6092	0/0	-4.6944
Abca2_sg3	Abca2	9.6972/110.94	22.388/82.929	-0.19254
Abca2_sg4	Abca2	83.119/20.092	38.38/91.148	0.32208
Abca3_sg1	Abca3	62.339/42.804	126.33/38.85	0.64188
Abca3_sg2	Abca3	71.344/18.345	16.791/0	-2.2867
Abca3_sg3	Abca3	6.2339/20.965	17.591/13.448	0.17822
Abca3_sg4	Abca3	47.101/40.184	39.979/14.195	-0.66851
Abca4_sg1	Abca4	60.954/48.046	21.589/115.8	0.32858
Abca4_sg2	Abca4	16.624/224.5	38.38/0	-2.59
Abca4_sg3	Abca4	4.1559/23.586	13.593/5.9769	-0.4635
Abca4_sg4	Abca4	88.66/5.2414	107.94/111.32	1.2061
Abca5_sg1	Abca5	87.968/91.724	24.787/172.58	0.13396
Abca5_sg2	Abca5	171.78/169.47	34.382/49.309	-2.002
Abca5_sg3	Abca5	15.238/13.977	21.589/17.931	0.41152
Abca5_sg4	Abca5	1.3853/66.391	0/0	-5.1247
Abca6_sg1	Abca6	20.78/6.1149	39.979/11.207	0.88023
Abca6_sg2	Abca6	78.963/141.52	34.382/50.056	-1.3639
Abca6_sg3	Abca6	25.628/43.678	45.576/41.091	0.31437
Abca6_sg4	Abca6	23.55/69.885	14.392/111.32	0.4203
Abca7_sg1	Abca7	33.248/77.747	219.08/44.08	1.2306
Abca7_sg2	Abca7	4.8486/14.851	27.985/27.643	1.4091
Abca7_sg3	Abca7	25.628/38.437	46.376/91.148	1.0785
Abca7_sg4	Abca7	72.036/5.2414	17.591/23.908	-0.86596
Abca8a_sg1	Abca8a	21.472/75.126	47.175/26.149	-0.38846
Abca8a_sg2	Abca8a	1.3853/13.977	16.791/29.137	1.4649
Abca8a_sg3	Abca8a	27.014/37.563	16.791/51.551	0.079365
Abca8a_sg4	Abca8a	47.793/58.529	32.783/73.217	-0.0042989
Abca8b_sg1	Abca8b	15.238/75.126	14.392/0.74711	-2.43
Abca8b_sg2	Abca8b	27.014/56.781	66.365/40.344	0.3415
Abca8b_sg3	Abca8b	99.05/69.885	21.589/20.172	-1.9657
Abca8b_sg4	Abca8b	27.014/0	64.766/20.172	1.5833
Abca9_sg1	Abca9	158.62/148.51	122.34/33.62	-0.96867
Abca9_sg2	Abca9	23.55/1.7471	123.93/8.2182	2.297
Abca9_sg3	Abca9	52.642/234.11	106.34/36.608	-0.99427
Abca9_sg4	Abca9	9.6972/22.713	18.39/37.356	0.7469
Abcb10_sg1	Abcb10	28.399/13.103	47.975/46.321	1.1464
Abcb10_sg2	Abcb10	16.624/110.94	108.74/54.539	0.35124
Abcb10_sg3	Abcb10	4.1559/22.713	24.787/24.655	0.83344
Abcb10_sg4	Abcb10	9.6972/46.299	19.989/12.701	-0.74142
Abcb11_sg1	Abcb11	124.68/27.08	55.97/118.79	0.20113
Abcb11_sg2	Abcb11	25.628/60.276	19.19/13.448	-1.3436
Abcb11_sg3	Abcb11	164.16/137.15	89.553/201.72	-0.048544
Abcb11_sg4	Abcb11	41.559/5.2414	18.39/20.172	-0.26677
Abcb1a_sg1	Abcb1a	85.197/13.103	34.382/124.77	0.68407
Abcb1a_sg2	Abcb1a	12.468/51.54	15.992/0	-1.8753
Abcb1a_sg3	Abcb1a	166.24/23.586	32.783/38.85	-1.3814
Abcb1a_sg4	Abcb1a	22.165/174.71	83.956/68.734	-0.3625
Abcb1b_sg1	Abcb1b	0/108.32	0/6.724	-3.6606
Abcb1b_sg2	Abcb1b	10.39/20.092	31.184/22.413	0.77537
Abcb1b_sg3	Abcb1b	77.578/93.471	123.93/69.481	0.17537
Abcb1b_sg4	Abcb1b	112.21/155.49	31.184/150.17	-0.55675
Abcb4_sg1	Abcb4	3.4633/5.2414	6.3966/13.448	1.029
Abcb4_sg2	Abcb4	73.422/26.207	22.388/12.701	-1.4542
Abcb4_sg3	Abcb4	154.46/193.93	63.966/76.952	-1.2938
Abcb4_sg4	Abcb4	2.7706/193.06	111.14/56.78	-0.21937
Abcb5_sg1	Abcb5	60.954/34.069	15.992/119.54	0.50335
Abcb5_sg2	Abcb5	18.702/16.598	74.361/71.723	1.9892
Abcb5_sg3	Abcb5	243.82/66.391	79.158/51.551	-1.2342
Abcb5_sg4	Abcb5	0/21.839	64.766/51.551	2.3113
Abcb6_sg1	Abcb6	12.468/81.241	27.985/45.574	-0.34105
Abcb6_sg2	Abcb6	177.32/172.09	67.964/62.757	-1.4048
Abcb6_sg3	Abcb6	90.045/0	15.192/32.873	-0.87855
Abcb6_sg4	Abcb6	41.559/34.942	6.3966/76.952	0.12065
Abcb7_sg1	Abcb7	18.702/0	98.348/0	2.2772
Abcb7_sg2	Abcb7	15.238/0	19.19/19.425	1.2364
Abcb7_sg3	Abcb7	15.931/0	16.791/0	0.067586
Abcb7_sg4	Abcb7	0/7.862	26.386/29.137	2.5442
Abcb9_sg1	Abcb9	97.665/221.88	161.51/207.7	0.2072
Abcb9_sg2	Abcb9	72.729/202.67	322.23/286.89	1.1395
Abcb9_sg3	Abcb9	6.2339/4.3678	23.987/8.2182	1.4406
Abcb9_sg4	Abcb9	67.88/124.05	47.175/23.908	-1.4079
Abcc1_sg1	Abcc1	38.096/44.552	26.386/114.31	0.75338
Abcc1_sg2	Abcc1	70.651/14.851	72.762/29.884	0.25814
Abcc1_sg3	Abcc1	54.027/51.54	36.781/11.207	-1.1056
Abcc1_sg4	Abcc1	20.78/0	0/0	-3.5097
Abcc10_sg1	Abcc10	43.637/199.17	31.184/128.5	-0.59846
Abcc10_sg2	Abcc10	99.743/13.977	0/72.47	-0.63591
Abcc10_sg3	Abcc10	212.65/0.87356	44.776/71.723	-0.86294
Abcc10_sg4	Abcc10	110.13/73.379	107.94/82.929	0.056137
Abcc12_sg1	Abcc12	9.0045/0	110.34/182.3	4.7428
Abcc12_sg2	Abcc12	107.36/330.21	19.19/73.964	-2.2078
Abcc12_sg3	Abcc12	26.321/6.9885	45.576/42.585	1.3525
Abcc12_sg4	Abcc12	41.559/4.3678	43.177/37.356	0.78412
Abcc2_sg1	Abcc2	26.321/89.103	27.186/0	-2.0084
Abcc2_sg2	Abcc2	28.399/99.586	231.88/106.84	1.3902
Abcc2_sg3	Abcc2	93.509/55.908	144.72/103.85	0.7267
Abcc2_sg4	Abcc2	171.78/42.804	25.586/49.309	-1.4939
Abcc3_sg1	Abcc3	69.266/63.77	114.34/72.47	0.48359
Abcc3_sg2	Abcc3	37.404/58.529	33.582/60.516	-0.02727
Abcc3_sg3	Abcc3	1.3853/6.9885	43.177/12.701	2.4801
Abcc3_sg4	Abcc3	25.628/124.05	38.38/24.655	-1.2217
Abcc4_sg1	Abcc4	45.023/48.046	47.175/117.3	0.80824
Abcc4_sg2	Abcc4	69.266/251.59	101.55/85.918	-0.76894
Abcc4_sg3	Abcc4	94.894/13.103	27.985/8.9653	-1.4978
Abcc4_sg4	Abcc4	81.734/57.655	29.584/73.217	-0.43201
Abcc5_sg1	Abcc5	0/30.575	167.11/52.298	2.7649
Abcc5_sg2	Abcc5	28.399/54.161	0/28.39	-1.4764
Abcc5_sg3	Abcc5	115.67/68.138	67.964/91.895	-0.1991
Abcc5_sg4	Abcc5	40.867/64.643	48.774/30.632	-0.40127
Abcc6_sg1	Abcc6	29.092/25.333	37.58/44.08	0.5682
Abcc6_sg2	Abcc6	6.9266/26.207	37.58/17.931	0.71099
Abcc6_sg3	Abcc6	11.775/31.448	31.184/5.2298	-0.23546
Abcc6_sg4	Abcc6	41.559/0	71.162/0	0.74812
Abcc8_sg1	Abcc8	83.119/0.87356	7.9958/0	-3.1048
Abcc8_sg2	Abcc8	287.45/15.724	57.57/97.124	-0.9617
Abcc8_sg3	Abcc8	26.321/43.678	28.785/8.2182	-0.88439
Abcc8_sg4	Abcc8	55.413/22.713	5.597/5.9769	-2.5614
Abcc9_sg1	Abcc9	56.798/23.586	88.753/95.63	1.1778
Abcc9_sg2	Abcc9	41.559/30.575	36.781/32.873	-0.0491
Abcc9_sg3	Abcc9	15.931/18.345	19.989/22.413	0.29164
Abcc9_sg4	Abcc9	115.67/36.69	22.388/0	-2.6621
Abcd2_sg1	Abcd2	19.394/55.034	0/92.642	0.30836
Abcd2_sg2	Abcd2	40.867/4.3678	84.755/75.458	1.78
Abcd2_sg3	Abcd2	33.94/38.437	53.572/8.9653	-0.20473
Abcd2_sg4	Abcd2	30.477/27.954	187.1/77.7	2.1424
Abcd3_sg1	Abcd3	9.6972/109.19	125.53/21.666	0.30353
Abcd3_sg2	Abcd3	40.867/34.942	102.35/7.4711	0.52313
Abcd3_sg3	Abcd3	147.54/55.908	74.361/150.17	0.14096
Abcd3_sg4	Abcd3	47.793/124.92	75.16/23.16	-0.80036
Abcd4_sg1	Abcd4	33.94/24.46	16.791/6.724	-1.2432
Abcd4_sg2	Abcd4	0/24.46	0/44.827	0.82354
Abcd4_sg3	Abcd4	0/5.2414	0/0	-1.8563
Abcd4_sg4	Abcd4	0/5.2414	0/0	-1.8563
Abce1_sg1	Abce1	0/0	17.591/20.172	3.8843
Abce1_sg2	Abce1	10.39/13.977	63.966/0	1.323
Abce1_sg3	Abce1	65.11/165.1	28.785/48.562	-1.5492
Abce1_sg4	Abce1	2.7706/6.9885	16.791/13.448	1.455
Abcf1_sg1	Abcf1	56.105/8.7356	0/35.861	-0.82001
Abcf1_sg2	Abcf1	11.775/23.586	0/0	-4.2235
Abcf1_sg3	Abcf1	8.3119/10.483	0/38.103	0.94749
Abcf1_sg4	Abcf1	7.6192/0	0/0	-2.2659
Abcf2_sg1	Abcf2	112.9/53.287	14.392/0	-3.359
Abcf2_sg2	Abcf2	113.6/102.21	39.979/70.228	-0.95685
Abcf2_sg3	Abcf2	37.404/21.839	8.7954/186.78	1.6898
Abcf2_sg4	Abcf2	200.87/158.99	82.357/56.033	-1.366
Abcf3_sg1	Abcf3	7.6192/6.1149	23.188/31.379	1.846
Abcf3_sg2	Abcf3	10.39/13.103	15.192/28.39	0.83835
Abcf3_sg3	Abcf3	18.009/0	0/24.655	0.41373
Abcf3_sg4	Abcf3	23.55/26.207	15.192/58.275	0.54408
Abcg1_sg1	Abcg1	87.968/47.172	6.3966/18.678	-2.3406
Abcg1_sg2	Abcg1	102.51/16.598	19.19/48.562	-0.79602
Abcg1_sg3	Abcg1	31.862/16.598	32.783/33.62	0.43892
Abcg1_sg4	Abcg1	35.326/294.39	127.93/26.149	-1.0876
Abcg2_sg1	Abcg2	157.93/29.701	61.568/0	-1.5768
Abcg2_sg2	Abcg2	28.399/37.563	19.989/29.137	-0.41065
Abcg2_sg3	Abcg2	324.16/61.149	170.31/54.539	-0.77177
Abcg2_sg4	Abcg2	14.546/105.7	11.194/32.873	-1.408
Abcg3_sg1	Abcg3	113.6/66.391	7.9958/79.194	-1.0289
Abcg3_sg2	Abcg3	5.5413/1.7471	20.789/20.919	2.2344
Abcg3_sg3	Abcg3	9.0045/0	15.992/80.688	3.1647
Abcg3_sg4	Abcg3	66.495/14.851	15.992/4.4827	-1.8908
Abcg4_sg1	Abcg4	123.99/38.437	50.373/35.861	-0.89799
Abcg4_sg2	Abcg4	20.087/13.103	82.357/46.321	1.8928
Abcg4_sg3	Abcg4	69.266/17.471	43.177/120.28	0.89889
Abcg4_sg4	Abcg4	36.018/12.23	17.591/17.931	-0.42135
Abcg5_sg1	Abcg5	27.706/30.575	70.363/89.653	1.4264
Abcg5_sg2	Abcg5	49.179/63.77	62.367/38.103	-0.16579
Abcg5_sg3	Abcg5	78.963/66.391	118.34/5.2298	-0.23082
Abcg5_sg4	Abcg5	45.715/6.9885	50.373/1.4942	-0.022224
Abcg8_sg1	Abcg8	76.192/175.59	65.565/77.7	-0.80488
Abcg8_sg2	Abcg8	44.33/32.322	48.774/79.194	0.72461
Abcg8_sg3	Abcg8	9.0045/15.724	62.367/43.332	2.0106
Abcg8_sg4	Abcg8	43.637/14.851	15.992/81.435	0.71699
Abhd10_sg1	Abhd10	47.793/26.207	3.1983/29.884	-1.1152
Abhd10_sg2	Abhd10	36.018/127.54	19.989/14.195	-2.1939
Abhd10_sg3	Abhd10	81.041/143.26	30.384/11.954	-2.3517
Abhd10_sg4	Abhd10	11.775/5.2414	29.584/34.367	1.7942
Abhd11_sg1	Abhd11	6.2339/0	0/27.643	1.848
Abhd11_sg2	Abhd11	78.963/79.494	79.158/0	-0.98338
Abhd11_sg3	Abhd11	54.72/99.586	33.582/0	-2.1351
Abhd11_sg4	Abhd11	45.023/7.862	84.755/40.344	1.2115
Abhd12_sg1	Abhd12	24.243/76	150.32/53.045	1.0062
Abhd12_sg2	Abhd12	199.49/78.62	109.54/50.804	-0.7869
Abhd12_sg3	Abhd12	17.316/51.54	61.568/7.4711	0.0037039
Abhd12_sg4	Abhd12	27.706/10.483	35.981/137.47	2.1262
Abhd12b_sg1	Abhd12b	85.89/5.2414	0/33.62	-1.3866
Abhd12b_sg2	Abhd12b	86.582/102.21	147.12/53.792	0.088895
Abhd12b_sg3	Abhd12b	20.087/67.264	5.597/75.458	-0.10542
Abhd12b_sg4	Abhd12b	63.032/96.965	165.51/174.08	1.0763
Abhd13_sg1	Abhd13	125.37/15.724	39.979/88.159	-0.13693
Abhd13_sg2	Abhd13	99.05/76.873	15.992/38.85	-1.6462
Abhd13_sg3	Abhd13	18.702/24.46	51.973/22.413	0.75822
Abhd13_sg4	Abhd13	64.417/45.425	23.987/15.689	-1.4242
Abhd14a_sg1	Abhd14a	31.17/114.44	239.87/129.25	1.3301
Abhd14a_sg2	Abhd14a	152.38/340.69	137.53/26.896	-1.5728
Abhd14a_sg3	Abhd14a	45.023/2.6207	45.576/90.4	1.4747
Abhd14a_sg4	Abhd14a	72.036/273.42	163.11/70.228	-0.56209
Abhd14b_sg1	Abhd14b	52.642/6.1149	80.757/0	0.44584
Abhd14b_sg2	Abhd14b	87.275/16.598	11.194/26.896	-1.401
Abhd14b_sg3	Abhd14b	18.009/96.092	47.975/29.884	-0.53985
Abhd14b_sg4	Abhd14b	24.243/76	61.568/47.068	0.11382
Abhd15_sg1	Abhd15	17.316/133.65	80.757/45.574	-0.25339
Abhd15_sg2	Abhd15	36.711/0	39.979/45.574	1.1774
Abhd15_sg3	Abhd15	60.261/18.345	78.359/43.332	0.61778
Abhd15_sg4	Abhd15	32.555/191.31	212.69/76.952	0.36873
Abhd16a_sg1	Abhd16a	24.936/35.816	7.9958/23.908	-0.88823
Abhd16a_sg2	Abhd16a	27.014/25.333	18.39/11.954	-0.7487
Abhd16a_sg3	Abhd16a	22.165/64.643	172.71/57.528	1.3868
Abhd16a_sg4	Abhd16a	15.238/115.31	6.3966/71.723	-0.7263
Abhd16b_sg1	Abhd16b	66.495/213.15	33.582/78.447	-1.3045
Abhd16b_sg2	Abhd16b	52.642/7.862	79.158/62.01	1.1957
Abhd16b_sg3	Abhd16b	51.257/20.965	0/79.941	0.14273
Abhd16b_sg4	Abhd16b	105.28/34.942	162.31/121.03	1.0045
Abhd17a_sg1	Abhd17a	15.931/62.896	55.171/18.678	-0.091721
Abhd17a_sg2	Abhd17a	17.316/38.437	44.776/112.07	1.4596
Abhd17a_sg3	Abhd17a	65.11/49.793	16.791/40.344	-0.98322
Abhd17a_sg4	Abhd17a	167.62/49.793	71.962/44.08	-0.89437
Abhd17b_sg1	Abhd17b	40.174/27.08	44.776/50.056	0.48359
Abhd17b_sg2	Abhd17b	11.775/70.758	31.184/93.389	0.58237
Abhd17b_sg3	Abhd17b	4.8486/34.942	12.793/121.03	1.7005
Abhd17b_sg4	Abhd17b	53.335/66.391	33.582/8.9653	-1.4502
Abhd17c_sg1	Abhd17c	20.087/149.38	63.167/13.448	-1.1251
Abhd17c_sg2	Abhd17c	81.041/1.7471	19.19/17.184	-1.1438
Abhd17c_sg3	Abhd17c	6.2339/27.08	33.582/2.9884	0.12725
Abhd17c_sg4	Abhd17c	139.92/173.84	165.51/29.884	-0.67771
Abhd18_sg1	Abhd18	28.399/4.3678	30.384/14.195	0.42197
Abhd18_sg2	Abhd18	45.715/1.7471	65.565/88.906	1.6615
Abhd18_sg3	Abhd18	112.21/168.6	175.91/70.228	-0.18869
Abhd18_sg4	Abhd18	89.353/11.356	71.962/136.72	1.0365
Abhd2_sg1	Abhd2	83.812/17.471	337.42/35.114	1.8585
Abhd2_sg2	Abhd2	78.27/28.827	192.7/62.01	1.2345
Abhd2_sg3	Abhd2	18.702/59.402	55.97/17.931	-0.07775
Abhd2_sg4	Abhd2	249.36/43.678	59.968/123.27	-0.67148
Abhd3_sg1	Abhd3	106.67/185.19	308.64/156.89	0.66991
Abhd3_sg2	Abhd3	32.555/92.597	35.181/140.46	0.48239
Abhd3_sg3	Abhd3	66.495/19.218	22.388/0	-1.8466
Abhd3_sg4	Abhd3	35.326/91.724	19.19/0	-2.6065
Abhd4_sg1	Abhd4	25.628/23.586	35.981/106.09	1.4922
Abhd4_sg2	Abhd4	28.399/187.82	232.68/18.678	0.21541
Abhd4_sg3	Abhd4	47.101/78.62	42.378/73.217	-0.11918
Abhd4_sg4	Abhd4	15.238/65.517	52.772/0	-0.59541
Abhd5_sg1	Abhd5	27.706/315.36	20.789/188.27	-0.70919
Abhd5_sg2	Abhd5	35.326/84.735	57.57/51.551	-0.13548
Abhd5_sg3	Abhd5	102.51/78.62	25.586/19.425	-1.9618
Abhd5_sg4	Abhd5	87.275/103.08	5.597/19.425	-2.8316
Abhd6_sg1	Abhd6	12.468/144.14	69.563/33.62	-0.59253
Abhd6_sg2	Abhd6	13.16/138.9	5.597/3.7356	-3.7649
Abhd6_sg3	Abhd6	36.711/50.666	29.584/217.41	1.4781
Abhd6_sg4	Abhd6	0/0	0/0	-0.42903
Abhd8_sg1	Abhd8	0/13.977	70.363/36.608	2.7699
Abhd8_sg2	Abhd8	11.083/62.896	0/61.263	-0.26423
Abhd8_sg3	Abhd8	26.321/61.149	36.781/66.493	0.23466
Abhd8_sg4	Abhd8	145.46/158.11	51.973/8.2182	-2.2967
Abi1_sg1	Abi1	21.472/0	110.34/109.08	3.2377
Abi1_sg2	Abi1	24.243/0	59.169/23.16	1.6841
Abi1_sg3	Abi1	25.628/1.7471	67.964/0	1.252
Abi1_sg4	Abi1	22.165/2.6207	42.378/0	0.72837
Abi3_sg1	Abi3	141.99/143.26	70.363/0	-1.989
Abi3_sg2	Abi3	144.07/115.31	55.97/10.46	-1.9335
Abi3_sg3	Abi3	7.6192/0	37.58/38.103	3.0136
Abi3_sg4	Abi3	15.238/19.218	18.39/84.424	1.5236
Abi3bp_sg1	Abi3bp	37.404/15.724	19.989/20.172	-0.38685
Abi3bp_sg2	Abi3bp	22.858/0	42.378/0	0.83614
Abi3bp_sg3	Abi3bp	192.56/13.103	32.783/37.356	-1.5254
Abi3bp_sg4	Abi3bp	22.858/7.862	54.371/31.379	1.4232
Abitram_sg1	Abitram	31.17/110.94	10.395/32.873	-1.6706
Abitram_sg2	Abitram	36.711/0	63.167/159.88	2.5394
Abitram_sg3	Abitram	157.93/651.68	616.47/738.89	0.74197
Abitram_sg4	Abitram	166.24/24.46	24.787/8.9653	-2.4302
Abl1_sg1	Abl1	24.243/32.322	5.597/44.827	-0.15981
Abl1_sg2	Abl1	65.802/55.908	53.572/31.379	-0.5087
Abl1_sg3	Abl1	58.876/82.115	117.54/124.77	0.77277
Abl1_sg4	Abl1	146.15/97.839	100.75/127.76	-0.093812
Abl2_sg1	Abl2	29.784/12.23	36.781/81.435	1.4496
Abl2_sg2	Abl2	15.238/0	19.989/2.9884	0.53502
Abl2_sg3	Abl2	21.472/123.17	27.186/60.516	-0.70911
Abl2_sg4	Abl2	114.98/45.425	83.156/30.632	-0.48813
Ablim2_sg1	Ablim2	56.105/279.54	147.92/301.09	0.41765
Ablim2_sg2	Ablim2	95.587/32.322	56.77/29.137	-0.56344
Ablim2_sg3	Ablim2	29.092/19.218	23.987/103.1	1.3594
Ablim2_sg4	Ablim2	91.431/122.3	211.89/23.16	0.13596
Ablim3_sg1	Ablim3	89.353/62.896	76.759/33.62	-0.45688
Ablim3_sg2	Ablim3	61.647/17.471	115.14/33.62	0.89416
Ablim3_sg3	Ablim3	24.936/13.103	7.1962/41.091	0.32879
Ablim3_sg4	Ablim3	42.252/100.46	51.173/29.884	-0.801
Abo_sg1	Abo	33.248/55.034	0/153.16	0.78123
Abo_sg2	Abo	112.21/76	38.38/86.665	-0.58226
Abo_sg3	Abo	289.53/64.643	14.392/50.056	-2.4223
Abo_sg4	Abo	39.481/23.586	105.54/19.425	0.96447
Abr_sg1	Abr	86.582/58.529	192.7/17.184	0.52636
Abr_sg2	Abr	29.092/42.804	22.388/70.228	0.3566
Abr_sg3	Abr	24.936/6.9885	40.778/67.24	1.6974
Abr_sg4	Abr	4.1559/11.356	0/3.7356	-1.6104
Abra_sg1	Abra	0/0	0/0	-0.42903
Abra_sg2	Abra	202.95/2.6207	182.3/80.688	0.35235
Abra_sg3	Abra	139.92/22.713	11.194/23.908	-2.1497
Abra_sg4	Abra	38.096/202.67	78.359/53.792	-0.85569
Abracl_sg1	Abracl	33.94/17.471	40.778/59.769	0.94107
Abracl_sg2	Abracl	136.45/60.276	53.572/20.172	-1.3916
Abracl_sg3	Abracl	72.036/47.172	11.194/70.976	-0.52612
Abracl_sg4	Abracl	108.05/49.793	203.09/29.137	0.55123
Abraxas1_sg1	Abraxas1	0/0	0/0	-0.42903
Abraxas1_sg2	Abraxas1	33.94/188.69	90.352/11.954	-1.1067
Abraxas1_sg3	Abraxas1	57.491/77.747	9.5949/59.769	-0.94341
Abraxas1_sg4	Abraxas1	81.041/119.68	72.762/90.4	-0.2956
Abraxas2_sg1	Abraxas2	94.894/214.02	84.755/32.126	-1.387
Abraxas2_sg2	Abraxas2	58.183/0	160.72/30.632	1.6838
Abraxas2_sg3	Abraxas2	57.491/108.32	27.186/0	-2.5235
Abraxas2_sg4	Abraxas2	56.798/17.471	51.973/44.827	0.3734
Abt1_sg1	Abt1	18.702/4.3678	0/0	-3.6479
Abt1_sg2	Abt1	2.7706/0	0/0	-1.2542
Abt1_sg3	Abt1	56.105/13.977	13.593/0	-2.2088
Abt1_sg4	Abt1	8.3119/32.322	0/26.149	-0.59891
Abtb1_sg1	Abtb1	26.321/39.31	17.591/72.47	0.44489
Abtb1_sg2	Abtb1	14.546/221.01	0/120.28	-0.95802
Abtb1_sg3	Abtb1	81.041/22.713	90.352/17.184	0.050698
Abtb1_sg4	Abtb1	29.092/27.954	67.964/39.597	0.89183
Abtb2_sg1	Abtb2	127.45/59.402	52.772/123.27	-0.085003
Abtb2_sg2	Abtb2	56.798/43.678	6.3966/72.47	-0.34167
Abtb2_sg3	Abtb2	2.078/72.505	27.186/7.4711	-1.063
Abtb2_sg4	Abtb2	4.1559/17.471	55.97/32.873	1.9429
Acaa1a_sg1	Acaa1a	65.802/30.575	52.772/60.516	0.22885
Acaa1a_sg2	Acaa1a	78.963/91.724	54.371/56.033	-0.61946
Acaa1a_sg3	Acaa1a	54.72/50.666	60.768/67.987	0.28405
Acaa1a_sg4	Acaa1a	29.784/137.15	113.54/53.792	0.0034027
Acaa1b_sg1	Acaa1b	54.72/105.7	75.96/103.85	0.16268
Acaa1b_sg2	Acaa1b	11.083/13.977	17.591/0	-0.46596
Acaa1b_sg3	Acaa1b	49.871/9.6092	19.989/20.919	-0.51886
Acaa1b_sg4	Acaa1b	216.8/2319.3	941.9/1985.8	0.20701
Acaa2_sg1	Acaa2	4.1559/2.6207	0/40.344	2.2704
Acaa2_sg2	Acaa2	24.936/8.7356	53.572/0	0.63959
Acaa2_sg3	Acaa2	117.75/152.87	20.789/25.402	-2.5001
Acaa2_sg4	Acaa2	9.6972/61.149	19.19/40.344	-0.24348
Acaca_sg1	Acaca	78.27/123.17	7.1962/36.608	-2.1511
Acaca_sg2	Acaca	31.862/55.908	0/0	-5.4882
Acaca_sg3	Acaca	93.509/22.713	10.395/100.86	-0.061922
Acaca_sg4	Acaca	108.05/17.471	59.968/124.77	0.55021
Acacb_sg1	Acacb	51.949/10.483	14.392/16.436	-0.97281
Acacb_sg2	Acacb	22.165/107.45	154.32/125.51	1.0985
Acacb_sg3	Acacb	45.715/53.287	49.574/50.056	0.0089386
Acacb_sg4	Acacb	33.94/154.62	68.764/11.207	-1.2171
Acad11_sg1	Acad11	15.931/38.437	22.388/104.6	1.1942
Acad11_sg2	Acad11	47.101/12.23	18.39/0	-1.5887
Acad11_sg3	Acad11	112.9/31.448	27.985/94.883	-0.22903
Acad11_sg4	Acad11	25.628/20.092	113.54/21.666	1.5237
Acad8_sg1	Acad8	8.3119/54.161	28.785/150.92	1.4948
Acad8_sg2	Acad8	0/0	0/0	-0.42903
Acad8_sg3	Acad8	29.784/15.724	101.55/71.723	1.8833
Acad8_sg4	Acad8	20.087/13.977	0/2.9884	-2.8539
Acad9_sg1	Acad9	33.94/28.827	11.194/47.068	-0.10402
Acad9_sg2	Acad9	128.83/9.6092	17.591/32.873	-1.4206
Acad9_sg3	Acad9	35.326/98.712	14.392/31.379	-1.5098
Acad9_sg4	Acad9	14.546/13.977	14.392/20.172	0.26055
Acadl_sg1	Acadl	29.092/37.563	85.555/42.585	0.92264
Acadl_sg2	Acadl	135.76/23.586	58.369/29.137	-0.8501
Acadl_sg3	Acadl	3.4633/101.33	22.388/88.906	0.085216
Acadl_sg4	Acadl	122.6/6.9885	102.35/0	-0.33466
Acadm_sg1	Acadm	27.014/73.379	11.194/20.919	-1.5857
Acadm_sg2	Acadm	20.78/8.7356	47.975/37.356	1.4704
Acadm_sg3	Acadm	4.1559/62.896	0/66.493	-0.011734
Acadm_sg4	Acadm	22.858/99.586	21.589/30.632	-1.1986
Acads_sg1	Acads	96.972/27.08	107.94/69.481	0.50935
Acads_sg2	Acads	12.468/25.333	39.179/5.2298	0.2216
Acads_sg3	Acads	9.6972/8.7356	28.785/8.2182	0.9327
Acads_sg4	Acads	42.252/43.678	15.992/53.045	-0.3078
Acadsb_sg1	Acadsb	27.014/37.563	15.192/67.987	0.35548
Acadsb_sg2	Acadsb	5.5413/12.23	54.371/49.309	2.4182
Acadsb_sg3	Acadsb	6.2339/68.138	18.39/3.7356	-1.6625
Acadsb_sg4	Acadsb	14.546/0.87356	66.365/39.597	2.6318
Acadvl_sg1	Acadvl	66.495/36.69	41.578/3.7356	-1.1526
Acadvl_sg2	Acadvl	87.968/125.79	78.359/84.424	-0.38887
Acadvl_sg3	Acadvl	26.321/125.79	4.7975/23.16	-2.363
Acadvl_sg4	Acadvl	9.6972/48.046	103.15/41.091	1.2915
Acan_sg1	Acan	36.018/178.21	3.1983/47.068	-2.0486
Acan_sg2	Acan	72.729/70.758	184.7/56.78	0.74293
Acan_sg3	Acan	9.0045/38.437	180.7/96.377	2.4969
Acan_sg4	Acan	7.6192/146.76	85.555/20.172	-0.53765
Acap1_sg1	Acap1	84.504/82.115	34.382/8.2182	-1.9186
Acap1_sg2	Acap1	0/0	0/0	-0.42903
Acap1_sg3	Acap1	31.862/1.7471	31.184/59.022	1.3726
Acap1_sg4	Acap1	57.491/34.942	27.985/116.55	0.63388
Acap2_sg1	Acap2	74.807/21.839	41.578/3.7356	-1.06
Acap2_sg2	Acap2	17.316/14.851	113.54/0	1.7577
Acap2_sg3	Acap2	41.559/48.919	34.382/0	-1.3459
Acap2_sg4	Acap2	178.01/0	115.14/41.838	-0.17928
Acap3_sg1	Acap3	9.6972/137.15	219.88/85.171	1.0447
Acap3_sg2	Acap3	279.14/61.149	102.35/124.02	-0.58387
Acap3_sg3	Acap3	81.734/41.931	117.54/33.62	0.28544
Acap3_sg4	Acap3	22.858/20.092	17.591/23.908	-0.047349
Acat1_sg1	Acat1	101.13/99.586	16.791/45.574	-1.6551
Acat1_sg2	Acat1	125.37/50.666	11.994/14.942	-2.6212
Acat1_sg3	Acat1	0/0	17.591/81.435	5.2295
Acat1_sg4	Acat1	110.13/15.724	19.19/59.022	-0.67264
Acat2_sg1	Acat2	22.858/27.954	22.388/41.091	0.31018
Acat2_sg2	Acat2	78.963/6.9885	32.783/0	-1.3383
Acat2_sg3	Acat2	54.027/62.896	47.975/7.4711	-1.0498
Acat2_sg4	Acat2	78.963/30.575	104.74/64.252	0.61644
Acat3_sg1	Acat3	18.009/0	0/20.172	0.14808
Acat3_sg2	Acat3	56.798/63.77	11.194/43.332	-1.1166
Acat3_sg3	Acat3	12.468/67.264	19.989/64.252	0.077474
Acat3_sg4	Acat3	66.495/28.827	142.32/97.124	1.3109
Acbd3_sg1	Acbd3	60.261/19.218	133.53/87.412	1.4522
Acbd3_sg2	Acbd3	30.477/50.666	191.9/14.942	1.3287
Acbd3_sg3	Acbd3	10.39/43.678	19.989/34.367	0.0074097
Acbd3_sg4	Acbd3	34.633/98.712	71.962/15.689	-0.59425
Acbd4_sg1	Acbd4	75.5/59.402	233.48/70.976	1.1625
Acbd4_sg2	Acbd4	158.62/38.437	131.13/86.665	0.14299
Acbd4_sg3	Acbd4	156.54/70.758	153.52/65.746	-0.051456
Acbd4_sg4	Acbd4	46.408/202.67	28.785/47.815	-1.6755
Acbd5_sg1	Acbd5	107.36/27.08	108.74/5.2298	-0.23451
Acbd5_sg2	Acbd5	7.6192/5.2414	0/17.184	0.36838
Acbd5_sg3	Acbd5	5.5413/59.402	130.33/41.838	1.3795
Acbd5_sg4	Acbd5	9.6972/22.713	35.181/5.9769	0.32682
Acbd6_sg1	Acbd6	242.43/13.103	6.3966/35.114	-2.5653
Acbd6_sg2	Acbd6	13.16/41.931	19.19/8.2182	-0.95706
Acbd6_sg3	Acbd6	27.706/38.437	68.764/0	0.054446
Acbd6_sg4	Acbd6	110.13/0	0/5.9769	-3.8132
Acbd7_sg1	Acbd7	29.784/29.701	6.3966/115.8	1.0143
Acbd7_sg2	Acbd7	55.413/51.54	57.57/25.402	-0.35865
Acbd7_sg3	Acbd7	94.201/93.471	116.74/102.35	0.22114
Acbd7_sg4	Acbd7	58.876/57.655	61.568/12.701	-0.63611
Accs_sg1	Accs	27.706/2.6207	48.774/35.114	1.4097
Accs_sg2	Accs	56.798/25.333	7.1962/106.84	0.46382
Accs_sg3	Accs	21.472/18.345	23.188/38.103	0.59789
Accs_sg4	Accs	196.02/53.287	61.568/148.68	-0.24375
Accsl_sg1	Accsl	69.266/51.54	36.781/73.964	-0.12332
Accsl_sg2	Accsl	14.546/8.7356	47.975/0	0.98312
Accsl_sg3	Accsl	23.55/122.3	107.14/6.724	-0.35165
Accsl_sg4	Accsl	34.633/92.597	91.152/72.47	0.35795
Acd_sg1	Acd	4.1559/1.7471	23.987/13.448	2.319
Acd_sg2	Acd	13.853/0	50.373/0	1.7241
Acd_sg3	Acd	14.546/15.724	26.386/25.402	0.73709
Acd_sg4	Acd	5.5413/3.4942	0/18.678	0.90593
Ace_sg1	Ace	8.3119/127.54	63.167/170.34	0.77266
Ace_sg2	Ace	60.261/48.046	123.93/22.413	0.42746
Ace_sg3	Ace	227.88/13.977	61.568/44.08	-1.1798
Ace_sg4	Ace	24.936/13.977	172.71/26.896	2.3009
Ace2_sg1	Ace2	54.72/0	19.19/130	1.4144
Ace2_sg2	Ace2	119.14/49.793	58.369/41.091	-0.75249
Ace2_sg3	Ace2	24.243/78.62	83.956/39.597	0.25978
Ace2_sg4	Ace2	9.6972/103.08	0.79958/37.356	-1.5152
Ace3_sg1	Ace3	16.624/48.919	112.74/97.872	1.6543
Ace3_sg2	Ace3	41.559/69.011	59.169/67.24	0.18991
Ace3_sg3	Ace3	248.66/84.735	183.1/89.653	-0.28773
Ace3_sg4	Ace3	34.633/48.046	42.378/24.655	-0.29473
Acer1_sg1	Acer1	45.715/21.839	22.388/54.539	0.18238
Acer1_sg2	Acer1	77.578/45.425	29.584/12.701	-1.4971
Acer1_sg3	Acer1	6.2339/76.873	16.791/5.2298	-1.825
Acer1_sg4	Acer1	33.248/0	32.783/8.2182	0.28684
Acer2_sg1	Acer2	31.862/109.19	200.69/103.85	1.0995
Acer2_sg2	Acer2	10.39/86.482	22.388/0	-2.0194
Acer2_sg3	Acer2	88.66/6.1149	254.27/29.884	1.5641
Acer2_sg4	Acer2	59.569/128.41	88.753/147.93	0.32922
Acer3_sg1	Acer3	81.734/90.85	127.13/61.263	0.12508
Acer3_sg2	Acer3	39.481/51.54	3.9979/6.724	-2.8703
Acer3_sg3	Acer3	38.096/69.011	59.169/68.734	0.25169
Acer3_sg4	Acer3	22.858/27.08	127.93/32.126	1.6416
Ache_sg1	Ache	44.33/24.46	7.9958/41.091	-0.47059
Ache_sg2	Ache	6.2339/118.8	19.989/20.919	-1.5659
Ache_sg3	Ache	164.85/89.977	131.93/87.412	-0.21453
Ache_sg4	Ache	29.784/53.287	86.354/121.78	1.3046
Acin1_sg1	Acin1	78.963/6.9885	81.557/51.551	0.61933
Acin1_sg2	Acin1	85.89/12.23	46.376/29.137	-0.36921
Acin1_sg3	Acin1	93.509/29.701	139.13/29.137	0.44342
Acin1_sg4	Acin1	174.55/0	7.9958/23.16	-2.4127
Ackr1_sg1	Ackr1	30.477/117.06	10.395/29.137	-1.8482
Ackr1_sg2	Ackr1	29.092/0	17.591/7.4711	-0.20027
Ackr1_sg3	Ackr1	63.724/109.19	45.576/0	-1.8784
Ackr1_sg4	Ackr1	41.559/35.816	59.169/2.9884	-0.30708
Ackr2_sg1	Ackr2	72.036/27.08	38.38/23.16	-0.67028
Ackr2_sg2	Ackr2	94.894/4.3678	74.361/136.72	1.0733
Ackr2_sg3	Ackr2	42.252/48.046	75.16/33.62	0.26333
Ackr2_sg4	Ackr2	13.16/72.505	72.762/46.321	0.4659
Ackr3_sg1	Ackr3	142.69/48.046	87.954/46.321	-0.50009
Ackr3_sg2	Ackr3	80.348/69.011	156.72/12.701	0.17954
Ackr3_sg3	Ackr3	15.931/107.45	11.194/35.861	-1.3538
Ackr3_sg4	Ackr3	13.16/6.9885	0/13.448	-0.51982
Ackr4_sg1	Ackr4	28.399/209.65	61.568/76.952	-0.77258
Ackr4_sg2	Ackr4	97.665/196.55	63.966/35.114	-1.5511
Ackr4_sg3	Ackr4	6.2339/103.95	32.783/55.286	-0.31681
Ackr4_sg4	Ackr4	100.44/116.18	25.586/64.252	-1.2513
Acly_sg1	Acly	6.2339/6.9885	4.7975/5.9769	-0.25294
Acly_sg2	Acly	81.734/20.965	37.58/0	-1.4034
Acly_sg3	Acly	22.858/13.103	0/0	-4.2464
Acly_sg4	Acly	7.6192/15.724	0/0	-3.6635
Acmsd_sg1	Acmsd	153.08/45.425	29.584/29.884	-1.7057
Acmsd_sg2	Acmsd	49.871/36.69	32.783/20.172	-0.68843
Acmsd_sg3	Acmsd	151/34.069	167.91/233.85	1.1099
Acmsd_sg4	Acmsd	103.9/98.712	43.177/26.149	-1.5204
Acnat1_sg1	Acnat1	70.651/13.103	115.14/61.263	1.0569
Acnat1_sg2	Acnat1	172.47/78.62	88.753/39.597	-0.95727
Acnat1_sg3	Acnat1	75.5/1.7471	32.783/57.528	0.22014
Acnat1_sg4	Acnat1	66.495/52.414	22.388/131.49	0.36652
Acnat2_sg1	Acnat2	82.426/48.046	67.964/76.952	0.14931
Acnat2_sg2	Acnat2	46.408/32.322	52.772/12.701	-0.25879
Acnat2_sg3	Acnat2	54.72/1.7471	99.947/126.26	1.9647
Acnat2_sg4	Acnat2	22.858/28.827	143.12/24.655	1.6611
Aco1_sg1	Aco1	40.174/25.333	26.386/131.49	1.2439
Aco1_sg2	Aco1	55.413/130.16	190.3/103.1	0.65522
Aco1_sg3	Aco1	117.06/26.207	37.58/118.04	0.11779
Aco1_sg4	Aco1	56.105/1.7471	7.1962/23.16	-0.88735
Aco2_sg1	Aco2	4.8486/0	109.54/0	4.0256
Aco2_sg2	Aco2	103.9/0	0/6.724	-3.6016
Aco2_sg3	Aco2	102.51/11.356	0/6.724	-3.7314
Aco2_sg4	Aco2	4.1559/0	5.597/0	0.30346
Acod1_sg1	Acod1	69.266/41.931	210.29/57.528	1.2531
Acod1_sg2	Acod1	95.587/92.597	23.188/85.918	-0.77547
Acod1_sg3	Acod1	45.023/17.471	83.956/44.08	1.0117
Acod1_sg4	Acod1	5.5413/99.586	34.382/33.62	-0.61386
Acot1_sg1	Acot1	49.871/41.057	22.388/83.676	0.2177
Acot1_sg2	Acot1	108.05/41.057	0/52.298	-1.4767
Acot1_sg3	Acot1	25.628/47.172	53.572/20.172	0.018077
[truncated: 77,634 more rows]

## Sheet: Sequencing Summary
Sample Label	Mapped Reads	TotalsgRNAs	Zerocounts
MHC_InputLib_L3cells_Rep1	5565075	79633	5896
MHC_InputLib_L3cells_Rep2	3871851	79633	6535
MHCII_positive_Rep1	5979290	79633	9755
MHCII_positive_Rep2	6029325	79633	10560
MHCII_negative_Rep1	6181910	79633	4124
MHCII_negative_Rep2	5640036	79633	8742
